# Supplementary material for: Gold-catalyzed cascade cycloisomerization of 1,7-diyn-3,6-bis(propargyl carbonate)s: stereoselective synthesis of naphtho[b]cyclobutenes
Source: Royal Society of Chemistry journal article supplement (doi:10.1039/c3cc44757j), 2013-01-01

**Supporting Information for**  
**Gold-Catalyzed Cascade Cycloisomerizations of 1,7-Diyn-3,6-bis(propargyl**  
**carbonate)s: Stereoselective Synthesis of Naphtho[b]cyclobutenes**

Ming Chen, Jun Liu, Lu Wang, Xiaobo Zhou and Yuanhong Liu\*

*State Key Laboratory of Organometallic Chemistry*

*Shanghai Institute of Organic Chemistry, Chinese Academy of Sciences,*

*345 Lingling Lu, Shanghai 200032, People's Republic of China*

*Fax: (+86) 021-64166128, E-mail: [yhliu@mail.sioc.ac.cn](mailto:yhliu@mail.sioc.ac.cn)*

**Contents:**

General Methods

Synthesis and characterization of substrates **1**

Synthesis and characterization of products **2** and **3**

X-ray crystal structure of compounds **2f** and **3**

NMR spectra of all new compounds

**General Methods.** All reactions were carried out under argon. THF and toluene were distilled from sodium and benzophenone. Unless noted, all commercial reagents were used without further purification.  $\text{Ph}_3\text{PAuCl}^1$  and  $\text{PPh}_3\text{AuNTf}_2^2$  were prepared according to the published methods. (Acetonitrile)[(2-biphenyl)di-*tert*-butylphosphine]gold(I) hexafluoroantimonate was purchased from Aldrich Chemical Company.  $\text{AgSbF}_6$  was purchased from Stream or Aldrich Chemical Company.  $\text{AgOTf}$  and  $\text{AgBF}_4$  were purchased from Acros Company. 1,2-Phenylenebis(3-phenylprop-2-yne-1,1-diyl) dimethyl dicarbonate **1a-1** was prepared according to published method.<sup>3</sup>

$^1\text{H}$  NMR spectra was recorded at 300 or 400 MHz,  $^{13}\text{C}$  NMR spectra was recorded at 75 or 100 MHz, in  $\text{CDCl}_3$  (containing 0.03% TMS) solutions.  $^1\text{H}$  NMR spectra was recorded with tetramethylsilane ( $\delta = 0.00$  ppm) as internal reference;  $^{13}\text{C}$

NMR spectra was recorded with  $\text{CDCl}_3$  ( $\delta = 77.00$  ppm) as internal reference. High-resolution mass spectra was obtained by using Waters Micromass GCT, Bruker Daltonics, Inc. APEXIII 7.0 TESLA FTMS, IonSpec 4.7 Tesla FTMS or Agilent Technologies 6224 TOF LC/MS mass spectrometer. Single crystal X-ray diffraction data was collected on a Bruker SMART diffractometer at 293(2) K with graphite-monochromated Mo-K $\alpha$  radiation ( $\lambda=0.71073$  Å).

### Synthesis of 1,7-diyn-3,6-bis(propargyl carbonate)s 1a-2, 1a-3, 1h, 1n and 1o.

#### Typical procedure for the synthesis of 1,2-phenylenebis(3-phenylprop-2-yne-1,1-diyl) dibenzyl dicarbonate (1a-2).

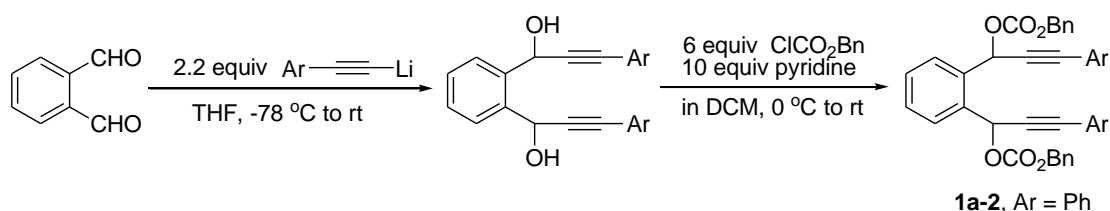

To a solution of ethynylbenzene (13.2 mL, 120.0 mmol) in THF (120.0 mL) was added n-BuLi (44.0 mL, 110.0 mmol, 2.5 M in hexanes) at  $-78$  °C. After stirring at the same temperature for 0.5 h, dry-ice/ acetone bath was withdrawn, then after ca. 10-15 min, phthalaldehyde (6.71 g, 50.0 mmol) was added. The resulting solution was stirred at room temperature for 1.5 h. Then the mixture was quenched with saturated ammonium chloride solution. The reaction mixture was extracted with ethyl acetate, and dried over anhydrous  $\text{Na}_2\text{SO}_4$ . The solvent was evaporated and the residue was purified by chromatography on silica gel (eluent: petroleum ether: acetone = 3:1) to afford 1,1'-(1,2-phenylene)bis(3-phenylprop-2-yn-1-ol) as a sticky yellow oil.

To a solution of above alcohol (1.69 g, 5.0 mmol) in DCM (20 mL) was added pyridine (4.0 mL, 50.0 mmol) at 0 °C. After stirring for several minutes, a DCM solution of benzyl chloroformate (4.3 mL, 30.0 mmol) was added dropwise (in some cases, the benzyl chloroformate was added directly, however, we found that the use of a DCM solution of benzyl chloroformate afforded better yields). The resulting solution was warmed up to room temperature and stirred for 4 h. Then the mixture was quenched with saturated ammonium chloride solution. The reaction mixture was

extracted with dichloromethane and dried over anhydrous  $\text{Na}_2\text{SO}_4$  (in some cases, ethyl acetate was used to extract the reaction mixture). The solvent was evaporated and the residue was purified by chromatography on silica gel (eluent: petroleum ether / ethyl acetate = 10:1) to afford compound **1a-2** as a mixture of two diastereomers with a ratio of 1 : 1.20 (2.75 g, 91% isolated yield) as a yellow oil.  $^1\text{H}$  NMR (400 MHz,  $\text{CDCl}_3$ ) two isomers:  $\delta$  7.80 (dd,  $J = 5.8, 3.2$  Hz), 7.76 (dd,  $J = 5.8, 3.2$  Hz), 7.46-7.38 (m), 7.32-7.20 (m), 7.01 (s, 1H), 6.99 (s, 1H), 5.18 and 5.03 (ABq,  $J = 12.0$  Hz, 2H), 5.16 and 5.01 (ABq,  $J = 12.0$  Hz, 2H).  $^{13}\text{C}$  NMR (100 MHz,  $\text{CDCl}_3$ ) two isomers:  $\delta$  153.83, 153.81, 134.78, 134.72, 134.67, 134.49, 131.82, 131.78, 129.67, 129.56, 129.38, 128.77, 128.70, 128.38, 128.36, 128.32, 128.15, 128.10, 128.07, 128.02, 121.66, 88.63, 88.20, 84.77, 84.69, 69.88, 67.50, 67.17. IR (film): 3064, 3034, 1750, 1490, 1455, 1443, 1382, 1239, 1030, 925, 906, 756, 691  $\text{cm}^{-1}$ ; HRMS (ESI) calcd for  $\text{C}_{40}\text{H}_{30}\text{O}_6\text{Na}$   $[\text{M}+\text{Na}]^+$ : 629.1935, found 629.1946.

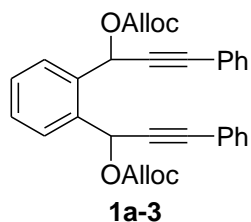

**1,2-Phenylenebis(3-phenylprop-2-yn-1,1-diyl) diallyl dicarbonate (1a-3).** To a solution of 1,1'-(1,2-phenylene)bis(3-phenylprop-2-yn-1-ol) (1.0 g, 3.0 mmol) in DCM (20 mL) were added pyridine (2.4 mL, 30.0 mmol) and DMAP (0.3 mmol, 36.6 mg) at 0 °C. After stirring for several minutes, allyl chloromate (1.9 mL, 18.0 mmol) was added dropwise. The resulting solution was warmed up to room temperature and stirred for 2 h. Then the mixture was quenched with saturated ammonium chloride solution. The reaction mixture was extracted with dichloromethane and dried over anhydrous  $\text{Na}_2\text{SO}_4$ . The solvent was evaporated and the residue was purified by chromatography on silica gel (eluent: petroleum ether / ethyl acetate = 10:1) to afford compound (**1a-3**) as a mixture of two diastereomers with a ratio of 1 : 1.18 (1.52 g, 100% isolated yield) as a yellow oil.  $^1\text{H}$  NMR (400 MHz,  $\text{CDCl}_3$ ) two isomers:  $\delta$  7.80 (dd,  $J = 5.8, 3.6$  Hz), 7.77 (dd,  $J = 5.6, 3.6$  Hz), 7.46-7.40 (m), 7.32-7.22 (m), 7.00 (s),

6.98 (s), 5.94-5.81 (m), 5.35-5.28 (m), 5.23-5.19 (m), 4.69-4.48 (m).  $^{13}\text{C}$  NMR (100 MHz,  $\text{CDCl}_3$ ) two isomers:  $\delta$  153.74, 153.70, 134.74, 134.56, 131.89, 131.86, 131.28, 131.23, 129.72, 129.60, 129.44, 128.85, 128.81, 128.75, 128.13, 128.08, 121.77, 118.95, 118.89, 88.62, 88.17, 84.78, 84.70, 68.83, 67.45, 67.12. IR (film): 3082, 3063, 2985, 2950, 2229, 1751, 1644, 1593, 1491, 1455, 1444, 1384, 1369, 1318, 1233, 1071, 1031, 906, 787, 757, 691  $\text{cm}^{-1}$ . HRMS (ESI) calcd for  $\text{C}_{32}\text{H}_{26}\text{O}_6$   $[\text{M}+\text{Na}]^+$ : 529.1627, found 529.1612.

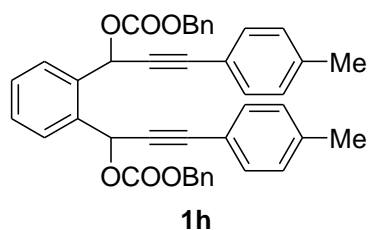

**1,2-Phenylenebis(3-(*p*-tolyl)prop-2-yne-1,1-diyl) dibenzyl dicarbonate (1h).**

Column chromatography on silica gel (eluent: petroleum ether: ethyl acetate =5:1) afforded the title product as a mixture of two diastereomers with a ratio of 1 : 1.27 in ca. 57% yield over two steps as a yellow oil.  $^1\text{H}$  NMR (400 MHz,  $\text{CDCl}_3$ ) two isomers:  $\delta$  7.79 (dd,  $J = 6.0, 3.2$  Hz), 7.75 (dd,  $J = 5.8, 3.2$  Hz), 7.43-7.40 (m), 7.32-7.26 (m), 7.05-7.00 (m), 5.16 and 5.01 (ABq,  $J = 12.0$  Hz, 2H), 5.15 and 5.00 (ABq,  $J = 12.0$  Hz, 2H), 2.30 (s), 2.29 (s).  $^{13}\text{C}$  NMR (100 MHz,  $\text{CDCl}_3$ ) two isomers:  $\delta$  153.90, 153.89, 138.96, 138.88, 134.90, 134.86, 134.83, 134.65, 131.83, 131.78, 129.64, 129.53, 129.40, 128.86, 128.82, 128.42, 128.41, 128.37, 128.34, 128.20, 128.17, 118.75, 118.73, 88.86, 88.45, 84.15, 84.07, 69.89, 67.64, 67.31, 21.42, 21.41. IR (film): 3064, 3032, 2956, 1751, 1509, 1498, 1455, 1382, 1319, 1241, 1022, 1007, 924, 906, 817, 785, 754, 697  $\text{cm}^{-1}$ . HRMS (ESI) calcd for  $\text{C}_{42}\text{H}_{34}\text{O}_6\text{Na}$   $[\text{M}+\text{Na}]^+$ : 657.22476, found 657.22694.

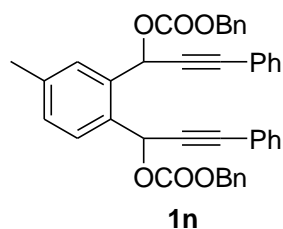

**Dibenzyl ((4-methyl-1,2-phenylene)bis(3-phenylprop-2-yne-1,1-diyl)) dicarbonate (1n).** Column chromatography on silica gel (eluent: petroleum ether: ethyl acetate =10:1) afforded the title product as a mixture of two diastereomers with a ratio of 1 : 1 in 34% yield over two steps as a yellow oil.  $^1\text{H}$  NMR (400 MHz,  $\text{CDCl}_3$ ) two isomers:  $\delta$  7.67 (d,  $J = 8.0$  Hz), 7.64 (d,  $J = 8.0$  Hz), 7.58 (s), 7.55 (s), 7.42-7.37 (m), 7.29-7.19 (m), 7.01 (s), 7.00 (s), 6.96 (s), 5.17 and 5.02 (ABq,  $J = 12.4$  Hz), 5.16 and 5.01 (ABq,  $J = 12.4$  Hz), 5.14 and 4.99 (ABq,  $J = 12.4$  Hz), 2.36 (s).  $^{13}\text{C}$  NMR (100 MHz,  $\text{CDCl}_3$ ) two isomers:  $\delta$  153.91, 153.89, 153.88, 153.85, 139.85, 139.73, 134.89, 134.86, 134.82, 134.80, 134.58, 134.37, 131.87, 131.83, 131.82, 131.79, 131.58, 130.37, 130.28, 129.99, 129.50, 129.33, 128.96, 128.75, 128.74, 128.69, 128.42, 128.41, 128.40, 128.36, 128.33, 128.23, 128.20, 128.17, 128.15, 128.10, 128.05, 121.82, 121.80, 88.49, 88.47, 88.06, 88.02, 84.94, 84.90, 84.86, 69.90, 69.86, 69.85, 67.58, 67.52, 67.22, 21.16. IR (film): 3063, 3034, 2957, 1751, 1490, 1456, 1443, 1382, 1319, 1234, 1030, 923, 904, 787, 756, 692  $\text{cm}^{-1}$ . HRMS (ESI) calcd for  $\text{C}_{41}\text{H}_{32}\text{O}_6\text{Na}$   $[\text{M}+\text{Na}]^+$ : 643.20911, found 643.20697.

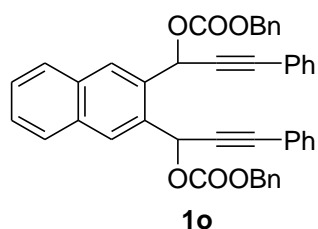

**Dibenzyl (naphthalene-2,3-diylbis(3-phenylprop-2-yne-1,1-diyl)) dicarbonate (1o).** Column chromatography on silica gel (eluent: petroleum ether: ethyl acetate =20:1 to 10:1) afforded the title product as a mixture of two diastereomers with a ratio of 1 : 1.4 in 53% yield over two steps as a yellow oil.  $^1\text{H}$  NMR (400 MHz,  $\text{CDCl}_3$ ) two isomers:  $\delta$  8.27 (s), 8.24 (s), 7.82-7.79 (m), 7.47-7.38 (m), 7.29-7.15 (m), 5.17 and 5.00 (ABq,  $J = 12.0$  Hz, 2H), 5.15 and 4.98 (ABq,  $J = 12.0$  Hz, 2H).  $^{13}\text{C}$  NMR

(100 MHz, CDCl<sub>3</sub>) two isomers:  $\delta$  153.88, 153.84, 134.76, 134.68, 133.01, 132.99, 131.82, 131.79, 131.77, 131.76, 129.55, 128.81, 128.76, 128.68, 128.34, 128.32, 128.27, 128.11, 128.06, 128.05, 128.00, 127.99, 127.89, 127.85, 127.24, 127.15, 121.65, 88.78, 88.35, 84.91, 84.82, 69.86, 69.84, 67.92, 67.62. IR (film): 3062, 3034, 2958, 1755, 1598, 1491, 1456, 1443, 1383, 1226, 1180, 1098, 1071, 1030, 1008, 994, 895, 788, 755, 691 cm<sup>-1</sup>. HRMS (ESI) calcd for C<sub>44</sub>H<sub>32</sub>O<sub>6</sub>Na [M+Na]<sup>+</sup>: 679.2091, found 679.2063.

### Synthesis of 1,7-diyn-3,6-bis(propargyl carbonate)s **1b-1g**, **1i** and **1j**.

#### Typical procedure for the synthesis of 1,2-phenylenebis(3-(4-chlorophenyl)prop-2-yne-1,1-diyl) dibenzyl dicarbonate (**1b**).

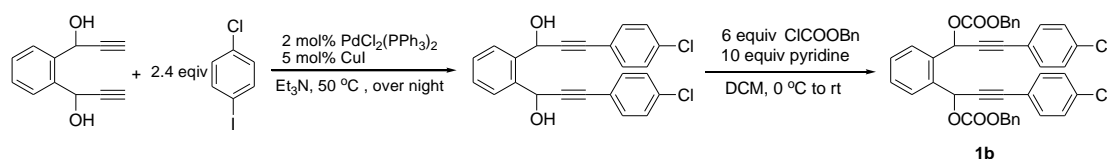

To a solution of 1,1'-(1,2-phenylene)bis(prop-2-yn-1-ol) (558.6 mg, 3.0 mmol) in triethylamine (20 mL) were added 1-chloro-4-iodobenzene (1.72 g, 7.2 mmol), PdCl<sub>2</sub>(PPh<sub>3</sub>)<sub>2</sub> (42.1 mg, 0.06 mmol) and CuI (28.6 mg, 0.15 mmol) at room temperature, then the mixture was heated overnight at 50 °C. After the starting material was consumed, the reaction mixture was quenched with saturated NH<sub>4</sub>Cl solution, extracted with ethyl acetate, and dried over anhydrous Na<sub>2</sub>SO<sub>4</sub>. The solvent was evaporated and the residue was used directly for the next step.

To a solution of above diol in DCM (20 mL) were added pyridine (2.4 mL, 30 mmol) at 0 °C. After stirring for several minutes, a DCM solution of benzyl chloroformate (2.6 mL, 18.0 mmol) was added dropwise. The resulting solution was warmed up to room temperature and stirred for 2.5 h. Then the mixture was quenched with saturated ammonium chloride solution. The reaction mixture was extracted with dichloromethane and dried over anhydrous Na<sub>2</sub>SO<sub>4</sub>. The solvent was evaporated and

the residue was purified by chromatography on silica gel (eluent: petroleum ether / ethyl acetate = 5:1) to afford compound (**1b**) as a mixture of two diastereomers with a ratio of 1 : 1.58 in 80% isolated yield (1.62 g) over two steps as a yellow oil.  $^1\text{H}$  NMR (400 MHz,  $\text{CDCl}_3$ ) two isomers:  $\delta$  7.77 (dd,  $J = 5.8, 3.2$  Hz), 7.72 (dd,  $J = 5.8, 3.2$  Hz), 7.41-7.37 (m), 7.25-7.23 (m), 7.16-7.11 (m), 7.043 (s), 7.037 (s), 5.15 and 5.01 (ABq,  $J = 12.0$  Hz, 2H), 5.13 and 5.00 (ABq,  $J = 12.0$  Hz, 2H).  $^{13}\text{C}$  NMR (100 MHz,  $\text{CDCl}_3$ ) two isomers:  $\delta$  153.81, 153.80, 134.93, 134.84, 134.71, 134.63, 134.48, 134.34, 133.04, 129.80, 129.68, 129.32, 128.81, 128.47, 128.45, 128.42, 128.41, 128.21, 128.18, 120.12, 87.47, 87.00, 85.68, 85.60, 70.01, 70.00, 67.33, 67.15. IR (film): 3036, 2950, 1751, 1489, 1382, 1242, 1091, 1016, 927, 907, 828, 755, 696  $\text{cm}^{-1}$ . HRMS (ESI) calcd for  $\text{C}_{40}\text{H}_{28}\text{Cl}_2\text{O}_6\text{Na}$   $[\text{M}+\text{Na}]^+$ : 697.1155, found 697.1162.

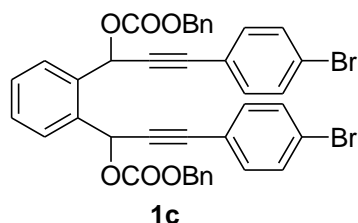

**1,2-Phenylenebis(3-(4-bromophenyl)prop-2-yne-1,1-diyl) dibenzyl dicarbonate (**1c**).** Column chromatography on silica gel (eluent: petroleum ether: ethyl acetate =10:1) afforded the title product as a mixture of two diastereomers with a ratio of 1 : 1 in 72% yield over two steps as a yellow oil.  $^1\text{H}$  NMR (400 MHz,  $\text{CDCl}_3$ ) two isomers:  $\delta$  7.77 (dd,  $J = 5.6, 3.2$  Hz), 7.72 (dd,  $J = 5.6, 3.2$  Hz), 7.40-7.36 (m), 7.30-7.21 (m), 7.18-7.14 (m), 7.05 (s), 7.04 (s), 5.14 and 5.00 (ABq,  $J = 12.0$  Hz, 2H), 5.12 and 4.98 (ABq,  $J = 12.0$  Hz, 2H).  $^{13}\text{C}$  NMR (100 MHz,  $\text{CDCl}_3$ ) two isomers:  $\delta$  153.65, 153.62, 134.54, 134.45, 134.30, 134.17, 133.03, 133.01, 131.21, 131.15, 129.67, 129.56, 129.18, 128.73, 128.26, 128.24, 128.00, 127.97, 123.08, 123.00, 120.34, 120.31, 87.40, 86.92, 85.81, 85.73, 69.81, 69.79, 67.17, 67.03. IR (film): 3065, 3033, 2957, 1751, 1487, 1383, 1318, 1242, 1096, 1071, 1012, 927, 907, 825, 786, 754, 697  $\text{cm}^{-1}$ . HRMS (ESI) calcd for  $\text{C}_{40}\text{H}_{28}\text{O}_6\text{Br}_2\text{Na}$   $[\text{M}+\text{Na}]^+$ : 785.0145, found 785.0133.

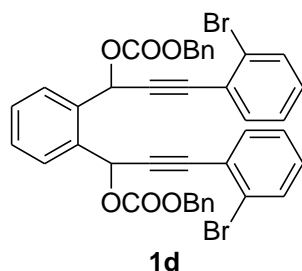

**1,2-Phenylenebis(3-(2-bromophenyl)prop-2-yne-1,1-diyl) dibenzyl dicarbonate**

**(1d).** Column chromatography on silica gel (eluent: petroleum ether: ethyl acetate =10:1) afforded the title product as a mixture of two diastereomers with a ratio of 1 : 1.63 in 63% yield over two steps as a yellow oil.  $^1\text{H}$  NMR (400 MHz,  $\text{CDCl}_3$ ) two isomers:  $\delta$  7.90-7.85 (m), 7.52-7.38 (m), 7.33-7.26 (m), 7.18-7.08 (m), 7.07 (s), 7.03 (s), 5.18 and 5.03 (ABq,  $J = 12.0$  Hz, 2H), 5.17 and 5.00 (ABq,  $J = 12.4$  Hz, 2H).  $^{13}\text{C}$  NMR (100 MHz,  $\text{CDCl}_3$ ) two isomers:  $\delta$  153.83, 134.85, 134.77, 134.36, 134.02, 133.77, 133.65, 132.25, 132.23, 130.01, 129.95, 129.85, 129.71, 129.07, 128.44, 128.41, 128.37, 128.23, 128.18, 126.80, 126.77, 125.80, 125.77, 123.98, 123.93, 89.08, 89.05, 87.06, 86.79, 69.99, 69.94, 67.70, 66.95. IR (film): 3060, 3030, 2964, 1751, 1470, 1382, 1315, 1248, 1007, 907, 785, 754, 697  $\text{cm}^{-1}$ . HRMS (ESI) calcd for  $\text{C}_{40}\text{H}_{28}\text{O}_6\text{Br}_2\text{Na}$   $[\text{M}+\text{Na}]^+$ : 785.0145, found 785.0143.

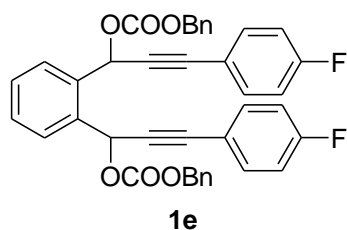

**1,2-Phenylenebis(3-(4-fluorophenyl)prop-2-yne-1,1-diyl) dibenzyl dicarbonate**

**(1e).** Column chromatography on silica gel (eluent: petroleum ether: ethyl acetate =10:1) afforded the title product as a mixture of two diastereomers with a ratio of 1 : 1.54 in 85% yield over two steps as a yellow oil.  $^1\text{H}$  NMR (400 MHz,  $\text{CDCl}_3$ ) two isomers:  $\delta$  7.78 (dd,  $J = 5.8, 3.6$  Hz), 7.73 (dd,  $J = 5.4, 4.0$  Hz), 7.44-7.41 (m), 7.38-7.26 (m), 7.01 (s), 7.00 (s), 6.94-6.86 (m), 5.17 and 5.03 (ABq,  $J = 12.0$  Hz, 2H), 5.16 and 5.02 (ABq,  $J = 12.0$  Hz, 2H).  $^{13}\text{C}$  NMR (100 MHz,  $\text{CDCl}_3$ ) two isomers:  $\delta$  162.72 (d,  $^1J_{\text{C-F}} = 250.5$  Hz), 162.66 (d,  $^1J_{\text{C-F}} = 250.5$  Hz), 153.86, 153.84, 134.77,



134.71, 134.60, 134.44, 133.84 (d,  $^3J_{C-F} = 8.3$  Hz), 133.83 (d,  $^3J_{C-F} = 8.6$  Hz), 129.75, 129.63, 129.32, 128.77, 128.44, 128.41, 128.40, 128.19, 128.16, 117.77 (d,  $^4J_{C-F} = 3.2$  Hz), 115.44 (d,  $^2J_{C-F} = 22.0$  Hz), 115.37 (d,  $^2J_{C-F} = 22.1$  Hz), 87.58, 87.12, 84.51 (d,  $^5J_{C-F} = 1.5$  Hz), 84.45 (d,  $^5J_{C-F} = 1.1$  Hz), 69.97, 69.96, 67.41, 67.19. IR (film): 3066, 3034, 2958, 1751, 1600, 1507, 1455, 1382, 1319, 1236, 1156, 1093, 1014, 926, 907, 837, 755, 697  $\text{cm}^{-1}$ . HRMS (ESI) calcd for  $\text{C}_{40}\text{H}_{28}\text{O}_6\text{F}_2\text{Na}$   $[\text{M}+\text{Na}]^+$ : 665.1746, found 665.1740.

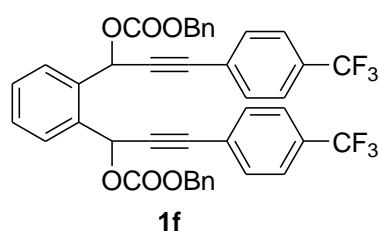

**1,2-phenylenebis(3-(4-(trifluoromethyl)phenyl)prop-2-yn-1,1-diyl) dibenzyl dicarbonate (1f).** Column chromatography on silica gel (eluent: petroleum ether: ethyl acetate =10:1) afforded the title product as a mixture of two diastereomers with a ratio of 1 : 1.69 in 50% yield over two steps as a yellow oil.  $^1\text{H}$  NMR (400 MHz,  $\text{CDCl}_3$ ) two isomers:  $\delta$  7.78 (dd,  $J = 5.4, 3.2$  Hz), 7.74 (dd,  $J = 5.8, 3.2$  Hz), 7.48-7.42 (m), 7.32-7.27 (m), 7.03 (s), 7.02 (s), 5.19 and 5.06 (ABq,  $J = 11.6$  Hz, 2H), 5.16 and 5.03 (ABq,  $J = 11.6$  Hz, 2H).  $^{13}\text{C}$  NMR (100 MHz,  $\text{CDCl}_3$ ) two isomers:  $\delta$  153.87, 153.86, 134.72, 134.62, 134.39, 134.26, 132.11, 132.07, 130.57 (q,  $^2J_{C-F} = 32.8$  Hz), 130.49 (q,  $^2J_{C-F} = 33.0$  Hz), 129.98, 129.86, 129.37, 128.94, 128.60, 128.55, 128.53, 128.51, 128.27, 128.26, 125.48, 125.47, 125.14 (q,  $^3J_{C-F} = 3.7$  Hz), 125.03 (q,  $^3J_{C-F} = 3.9$  Hz), 123.70 (q,  $^1J_{C-F} = 272.2$  Hz), 123.68 (q,  $^1J_{C-F} = 272.4$  Hz), 87.21, 87.06, 86.98, 86.72, 70.18, 67.24, 67.13. IR (film): 3067, 3035, 2959, 1752, 1615, 1498, 1456, 1406, 1383, 1325, 1242, 1170, 1126, 1106, 1068, 1018, 929, 908, 843, 784, 754, 697  $\text{cm}^{-1}$ . HRMS (ESI) calcd for  $\text{C}_{42}\text{H}_{28}\text{O}_6\text{F}_6\text{Na}$   $[\text{M}+\text{Na}]^+$ : 765.1682, found 765.1673.

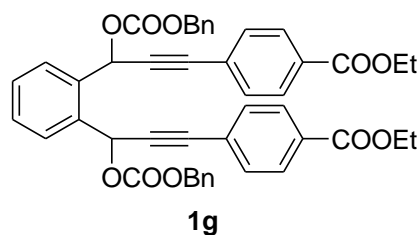

**Diethyl 4,4'-(1,2-phenylenebis(3-(((benzyloxy)carbonyl)oxy)prop-1-yne-3,1-diyl))-dibenzoate (1g).** Column chromatography on silica gel (eluent: petroleum ether: ethyl acetate =10:1) afforded the title product as a mixture of two diastereomers with a ratio of 1 : 1.6 in 79% yield over two steps as a yellow oil.  $^1\text{H}$  NMR (400 MHz,  $\text{CDCl}_3$ ) two isomers:  $\delta$  7.93-7.88 (m), 7.80 (dd,  $J = 5.6, 3.6$  Hz), 7.76 (dd,  $J = 5.4, 3.6$  Hz), 7.46-7.42 (m), 7.28-7.25 (m), 7.08 (s), 5.18 and 5.05 (ABq,  $J = 11.6$  Hz, 2H), 5.15 and 5.02 (ABq,  $J = 12.0$  Hz, 2H), 4.32 (q,  $J = 6.8$ , 4H), 1.34 (t,  $J = 6.8$ , 6H).  $^{13}\text{C}$  NMR (100 MHz,  $\text{CDCl}_3$ ) two isomers:  $\delta$  165.39, 165.38, 153.63, 153.61, 134.56, 134.47, 134.25, 134.11, 131.48, 130.23, 130.15, 129.72, 129.59, 129.22, 129.02, 128.97, 128.77, 128.26, 128.24, 128.22, 128.00, 127.96, 125.92, 125.89, 87.61, 87.35, 87.26, 87.13, 69.84, 67.11, 66.97, 60.84, 13.97. IR (film): 2981, 1752, 1717, 1606, 1456, 1405, 1272, 1243, 1176, 1106, 1021, 928, 908, 754, 769, 696  $\text{cm}^{-1}$ . HRMS (ESI) calcd for  $\text{C}_{46}\text{H}_{38}\text{O}_{10}\text{Na}$   $[\text{M}+\text{Na}]^+$ : 773.2357, found 773.2342.

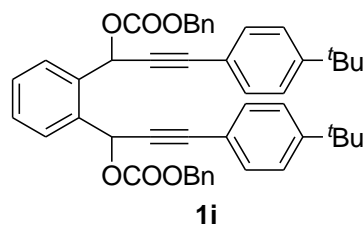

**1,2-Phenylenebis(3-(4-(tert-butyl)phenyl)prop-2-yne-1,1-diyl) dibenzyl dicarbonate (1i).** Column chromatography on silica gel (eluent: petroleum ether: ethyl acetate =5:1) afforded the title product as a mixture of two diastereomers with a ratio of 1 : 1.52 in 29% yield over two steps as a yellow oil.  $^1\text{H}$  NMR (400 MHz,  $\text{CDCl}_3$ ) two isomers:  $\delta$  7.79 (dd,  $J = 5.8, 3.2$  Hz), 7.76 (dd,  $J = 5.6, 3.2$  Hz), 7.40-7.33 (m), 7.28-7.21 (m), 7.06 (s), 7.04 (s), 5.15 and 5.01 (ABq,  $J = 12.0$  Hz), 5.13 and 4.98 (ABq,  $J = 12.4$  Hz, 2H), 1.25 (s), 1.24 (s).  $^{13}\text{C}$  NMR (100 MHz,  $\text{CDCl}_3$ ) two isomers:  $\delta$  153.83, 153.80, 151.94, 151.87, 134.79, 134.77, 134.74, 134.58, 131.61, 131.56,

129.57, 129.46, 129.33, 128.78, 128.34, 128.33, 128.29, 128.26, 128.12, 128.09, 125.03, 124.99, 118.71, 88.77, 88.33, 84.20, 84.14, 69.78, 67.58, 67.26, 34.57, 34.56, 30.95. IR (film): 3033, 2962, 2863, 1751, 1505, 1456, 1383, 1243, 1021, 926, 907, 836, 696  $\text{cm}^{-1}$ . HRMS (ESI) calcd for  $\text{C}_{48}\text{H}_{46}\text{O}_6\text{Na}$   $[\text{M}+\text{Na}]^+$ : 741.3187, found 741.3178.

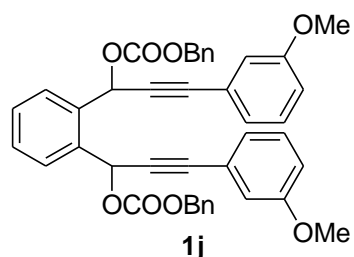

**1,2-Phenylenebis(3-(3-methoxyphenyl)prop-2-yn-1,1-diyl) dibenzyl dicarbonate**

**(1j).** Column chromatography on silica gel (eluent: petroleum ether: ethyl acetate =5:1) afforded the title product as a mixture of two diastereomers with a ratio of 1 : 1.30 in 33% yield over two steps as a yellow oil.  $^1\text{H}$  NMR (400 MHz,  $\text{CDCl}_3$ ) two isomers:  $\delta$  7.79 (dd,  $J = 5.8, 3.6$  Hz), 7.75 (dd,  $J = 5.8, 3.6$  Hz), 7.42-7.39 (m), 7.28-7.23 (m), 7.14-6.93 (m), 6.83-6.79 (m), 5.15 and 5.00 (ABq,  $J = 12.0$  Hz, 2H), 5.13 and 4.98 (ABq,  $J = 12.0$  Hz, 2H), 3.62 (s).  $^{13}\text{C}$  NMR (100 MHz,  $\text{CDCl}_3$ ) two isomers:  $\delta$  158.97, 158.94, 153.77, 153.75, 134.68, 134.61, 134.58, 134.39, 129.66, 129.56, 129.30, 129.13, 129.09, 128.80, 128.32, 128.31, 128.28, 128.08, 128.04, 124.26, 124.22, 122.52, 116.35, 116.31, 115.50, 115.44, 88.49, 88.05, 84.48, 84.39, 69.83, 67.38, 67.09, 54.92. IR (film): 3066, 3033, 2959, 2835, 1751, 1596, 1574, 1489, 1456, 1382, 1320, 1249, 1206, 1175, 1165, 1045, 928, 908, 785, 755, 698, 687  $\text{cm}^{-1}$ . HRMS (ESI) calcd for  $\text{C}_{42}\text{H}_{34}\text{O}_8\text{Na}$   $[\text{M}+\text{Na}]^+$ : 689.2146, found 689.2174.

**Synthesis of 1,7-diyn-3,6-bis(propargyl carbonate)s 1k, 1l and 1m. Typical procedure for the synthesis of ethyl 4-(3-(((benzyloxy)carbonyl)oxy)-3-(2-(1-(((benzyloxy)carbonyl)oxy)-3-phenylprop-2-yn-1-yl)phenyl)prop-1-yn-1-yl)benzoate (1l).**

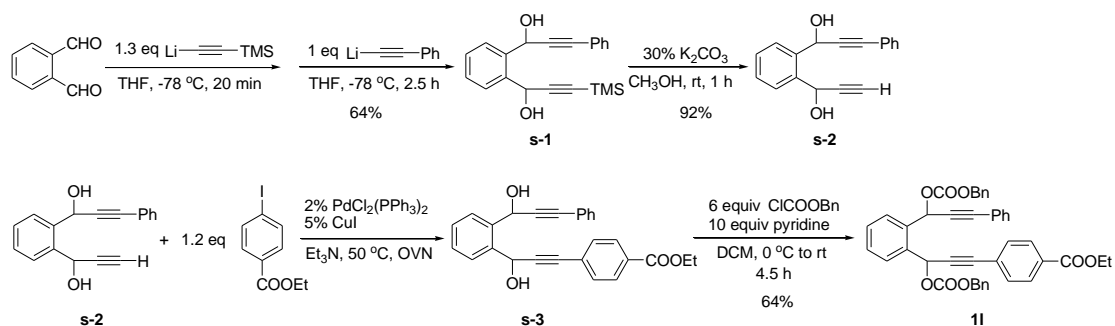

A THF solution of ethynyltrimethylsilane (1.84 mL, 13.0 mmol in 20 mL THF) and phenylacetylene (1.1 mL, 10 mmol in 20 mL THF) were placed in two 100 mL round bottom flasks respectively. *n*-BuLi (2.5 M in hexane, 5.2 mL, 13.0 mmol) was added to the ethynyltrimethylsilane solution, and *n*-BuLi (2.5 M in hexane, 4.0 mL, 10.0 mmol) was added to the phenylacetylene solution at  $-78\text{ }^{\circ}\text{C}$ . This deprotonation reaction was stirred for 10 min. (deprotonation of phenylacetylene was also accomplished accordingly). To the solution of lithium trimethylsilylacetylide was then added a THF solution of phthalaldehyde (1.34 g, 10.0 mmol in 20 mL). The mixture was stirred for 10 minutes at  $-78\text{ }^{\circ}\text{C}$  before a solution of lithium phenylacetylide was added. The reaction mixture was warmed up to room temperature and stirred for 2.5 h. Then the mixture was quenched with saturated ammonium chloride solution. The reaction mixture was extracted with ethyl acetate and dried over anhydrous  $\text{Na}_2\text{SO}_4$ . The solvent was evaporated and the residue was purified by chromatography on silica gel (eluent: petroleum ether / ethyl acetate = 3:1) to afford the diol **s-1** as a colorless oil.

To a solution of above diol **s-1** (2.96 g, 8.8 mmol) were added MeOH (30 mL) and  $\text{K}_2\text{CO}_3$  (364 mg, 2.64 mmol), after stirring for 1 h at room temperature. The mixture was quenched with  $\text{H}_2\text{O}$ , extracted with ethyl acetate and dried over anhydrous  $\text{Na}_2\text{SO}_4$ . The solvent was evaporated and the residue was purified by chromatography on silica gel (eluent: petroleum ether: acetone = 3:1) to afford diol **s-2** as a mixture of two diastereomers with a ratio of 1 : 4.8 in 92% isolated yield (2.12 g) as a colorless oil.  $^1\text{H}$  NMR (400 MHz,  $\text{CDCl}_3$ ) two isomers:  $\delta$  7.91-7.82 (m), 7.69-7.60 (m), 7.50-7.45 (m), 7.40-7.27 (m), 6.16 (s), 6.04 (s), 5.98 (s), 5.85 (d), 4.38 (s), 4.27 (s), 3.93 (s), 3.86 (s), 2.70-2.67 (m).  $^{13}\text{C}$  NMR (100 MHz,  $\text{CDCl}_3$ ) two

isomers:  $\delta$  137.98, 137.72, 137.56, 137.22, 131.72, 129.13, 129.10, 128.64, 128.60, 128.26, 128.25, 127.98, 127.89, 122.18, 122.15, 87.75, 87.65, 87.47, 82.69, 82.34, 75.90, 75.56, 63.75, 62.92, 62.16, 61.43. IR (film): 3360, 3289, 1597, 1489, 1453, 1442, 1323, 1300, 1199, 1176, 1098, 1046, 1027, 1014, 997, 965, 939, 811, 773, 758, 736, 694, 664  $\text{cm}^{-1}$ . HRMS (MALDI/DHB) calcd for  $\text{C}_{18}\text{H}_{14}\text{O}_2\text{Na}$   $[\text{M}+\text{Na}]^+$ : 285.0886, found 285.0883.

To a solution of diol **s-2** (524.6 mg, 2.0 mmol) in triethylamine (20 mL) were added ethyl 4-iodobenzoate (662.57 mg, 2.4 mmol),  $\text{PdCl}_2(\text{PPh}_3)_2$  (28.0 mg, 0.04 mmol) and CuI (19.0 mg, 0.10 mmol) at room temperature, then the mixture was heated overnight at 50 °C. After the starting material was consumed, the mixture was quenched with saturated ammonium chloride solution, extracted with ethyl acetate, and dried over anhydrous  $\text{Na}_2\text{SO}_4$ . The solvent was evaporated, and the residue was purified by chromatography on silica gel (petroleum: acetone = 3:1) to afford diol **s-3** as a yellow oil.

To a solution of above diol **s-3** (646.8 mg, 1.57 mmol) in DCM (20 mL) was added pyridine (1.3 mL, 15.7 mmol) at 0 °C. After stirring for several minutes, benzyl chloroformate (1.3 mL, 9.4 mmol) was added. The resulting solution was warmed up to room temperature and stirred for 1 h. Then the mixture was quenched with saturated ammonium chloride solution. The reaction mixture was extracted with dichloromethane and dried over anhydrous  $\text{Na}_2\text{SO}_4$ . The solvent was evaporated and the residue was purified by chromatography on silica gel (eluent: petroleum ether / ethyl acetate = 10:1) to afford the title product (**11**) as a mixture of two diastereomers (dr = ca. 4.5:1) in 64% yield (0.87 g) over two steps as a yellow oil.  $^1\text{H}$  NMR (400 MHz,  $\text{CDCl}_3$ ) two isomers:  $\delta$  7.92-7.88 (m), 7.76-7.74 (m), 7.46-7.38 (m), 7.31-7.20 (m), 7.05 (s), 7.03 (s), 6.98 (s), 5.18-5.15 (m), 5.05-4.99 (m), 4.35 (q,  $J = 7.2$  Hz), 1.38 (t,  $J = 7.2$ , 3H).  $^{13}\text{C}$  NMR (100 MHz,  $\text{CDCl}_3$ ) major isomer:  $\delta$  165.84, 153.89, 153.83, 134.74, 134.58, 134.26, 131.87, 131.73, 130.30, 129.72, 129.67, 129.22, 129.18, 128.88, 128.83, 128.48, 128.28, 128.25, 128.11, 126.28, 121.72, 88.34, 87.59, 87.28, 84.67, 84.59, 70.06, 70.03, 67.33, 67.01, 61.11, 14.23. Minor isomer: 134.82,

134.80, 134.78, 131.76, 130.38, 129.81, 128.20, 128.16, 88.41, 87.50, 84.59, 67.64, 67.10, 61.22. Other peaks are overlapped with the signal of the major isomer. IR (film): 3024, 2964, 1747, 1715, 1490, 1455, 1382, 1231, 1176, 1105, 1020, 924, 905, 785, 769, 754, 736, 692  $\text{cm}^{-1}$ . HRMS (ESI) calcd for  $\text{C}_{43}\text{H}_{34}\text{O}_8\text{Na}$   $[\text{M}+\text{Na}]^+$ : 701.2146, found 701.2120.

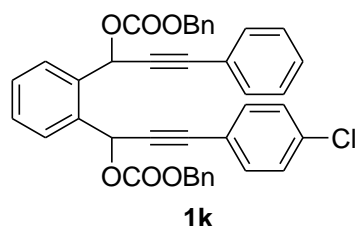

(**1k**). Column chromatography on silica gel (eluent: petroleum ether: ethyl acetate =10:1) afforded the title product as a mixture of two diastereomers (dr = ca. 1:7.1) in 78% yield over two steps from **s-2** as a yellow oil.  $^1\text{H}$  NMR (400 MHz,  $\text{CDCl}_3$ ) two isomers:  $\delta$  7.77-7.71 (m), 7.44-7.36 (m), 7.29-7.14 (m), 7.01(s), 7.00 (s), 5.16 and 5.02 (ABq,  $J = 12.4$  Hz), 5.15 and 5.02 (ABq,  $J = 11.6$  Hz), 5.14 and 4.99 (ABq,  $J = 12.0$  Hz).  $^{13}\text{C}$  NMR (100 MHz,  $\text{CDCl}_3$ ) major isomer:  $\delta$  153.86, 153.81, 134.79, 134.72, 134.53, 134.36, 133.06, 131.82, 129.64, 129.61, 128.84, 128.77, 128.70, 128.43, 128.40, 128.23, 128.18, 128.07, 121.68, 120.20, 88.25, 86.99, 85.79, 84.72, 69.97, 67.24, 67.06. Minor isomer: 134.86, 134.69, 134.56, 133.08, 129.76, 129.74, 129.44, 129.31, 128.15, 128.13, 88.72, 87.44, 85.72, 84.66, 67.53, 67.38. Other peaks are overlapped with the signal of the major isomer. IR (film): 3057, 3028, 1746, 1489, 1455, 1381, 1317, 1232, 1180, 1090, 1015, 996, 924, 905, 828, 785, 754, 736, 692  $\text{cm}^{-1}$ . HRMS (ESI) calcd for  $\text{C}_{40}\text{H}_{29}\text{O}_6\text{ClNa}$   $[\text{M}+\text{Na}]^+$ : 663.1545, found 663.1530.

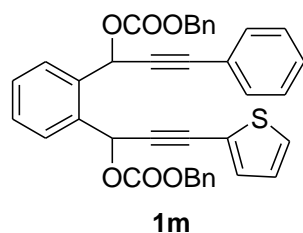

(**1m**). Column chromatography on silica gel (eluent: petroleum ether: ethyl acetate =10:1) afforded the title product as a mixture of two diastereomers (dr = ca. 1:4.14) in

70% yield over two steps from **s-2** as a brown oil.  $^1\text{H}$  NMR (400 MHz,  $\text{CDCl}_3$ ) two isomers:  $\delta$  7.75-7.72 (m), 7.44-7.37 (m), 7.32-7.16 (m), 7.08 (s), 7.02 (s), 6.97 (s), 6.95 (s), 6.89-6.86 (m), 5.17 and 5.05 (ABq,  $J = 12.0$  Hz), 5.14 and 4.98 (ABq,  $J = 12.0$  Hz). Some peaks of minor isomer are overlapped with the signal of the major isomer.  $^{13}\text{C}$  NMR (100 MHz,  $\text{CDCl}_3$ ) major isomers:  $\delta$  153.85, 153.81, 134.81, 134.74, 134.53, 134.24, 133.24, 131.83, 129.66, 129.63, 128.93, 128.74, 128.44, 128.43, 128.42, 128.25, 128.22, 128.07, 127.98, 126.86, 126.82, 121.72, 121.55, 88.56, 88.32, 84.67, 81.64, 69.99, 69.97, 67.25, 67.18. Minor isomer: 134.84, 134.67, 134.46, 133.31, 131.91, 129.78, 129.76, 129.49, 129.41, 128.83, 128.38, 128.18, 128.17, 128.13, 128.02, 126.86, 88.79, 84.59, 67.64, 67.45. Other peaks are overlapped with the signal of the major isomer. IR (film): 3073, 3028, 1745, 1490, 1455, 1381, 1314, 1231, 1192, 1178, 923, 904, 784, 754, 692  $\text{cm}^{-1}$ . HRMS (ESI) calcd for  $\text{C}_{38}\text{H}_{28}\text{O}_6\text{SNa}$   $[\text{M}+\text{Na}]^+$ : 635.1499, found 635.1489.

### Typical procedure for the synthesis of *cis*-dihydrocyclobuta[*b*]naphthalene **2a**.

(All reactions were carried out on 0.2 mmol scale).

Condition A:

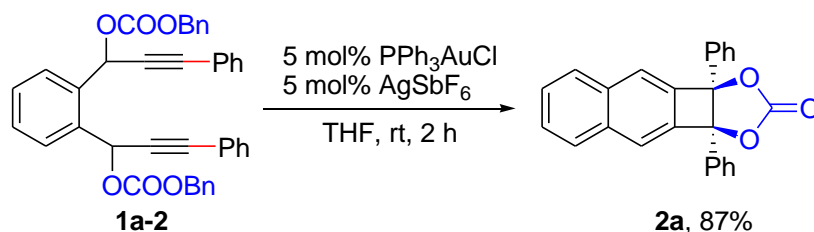

**Condition A:** In a glovebox, to a Schlenk tube was added  $\text{AgSbF}_6$  (3.4 mg, 0.01 mmol). Then the Schlenk tube was removed from the glovebox,  $\text{PPh}_3\text{AuCl}$  (5 mg, 0.01 mmol) and THF (0.5 mL) were successively added and the mixture was stirred at room temperature for 15-20 min. Then a THF solution of **1a-2** (121.3 mg, 0.2 mmol in 1.5 mL THF) was added. After the reaction mixture was stirred at room temperature for 2 h, the solvent was evaporated under the reduced pressure and the residue was purified by chromatography on silica gel (petroleum: ethyl acetate = 20:1) to afford **2a** (63.4 mg, 87%) as a white solid. In a separate experiment, we also isolated a byproduct of benzyl alcohol in 23% yield. It is noted that under condition A,

the reaction mixture became viscous as the reaction progressed. It was found that partial polymerization of THF solvent occurred under the conditions as evidenced by the NMR spectra of the crude reaction mixture.

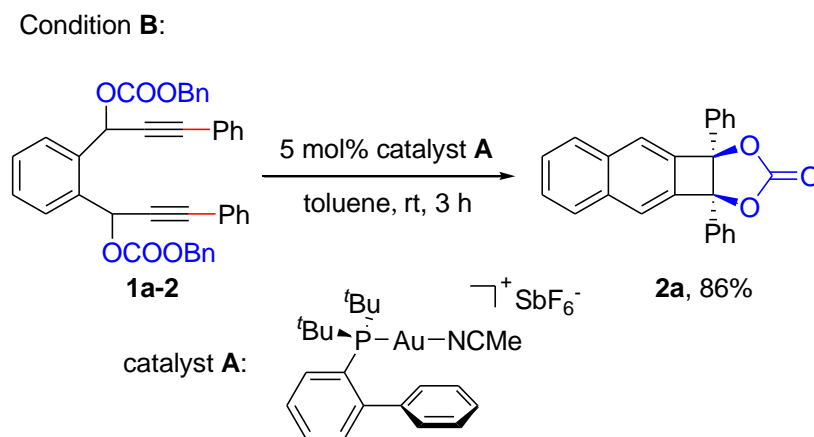

**Condition B:** To a solution of 1,2-phenylenebis(3-phenylprop-2-yn-1,1-diyl) dibenzyl dicarbonate **1a-2** (121.3 mg, 0.2 mmol) in toluene (2 mL) was added [Johnphos(MeCN)Au]SbF<sub>6</sub> (7.7 mg, 0.01 mmol). After the reaction mixture was stirred at room temperature for 3 h, the solvent was evaporated under the reduced pressure and the residue was purified by chromatography on silica gel (petroleum: ethyl acetate = 20:1) to afford **2a** (62.7 mg, 86%) as a white solid.

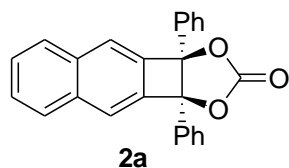

(3aR\*,9bS\*)-3a,9b-Diphenyl-3a,9b-dihydronaphtho[2',3':3,4]cyclobuta[1,2-d][1,3]dioxol-2-one (**2a**). M.p. 206-207 °C. <sup>1</sup>H NMR (400 MHz, CDCl<sub>3</sub>) δ 8.04 (s, 2H), 7.98 (dd, *J* = 6.0, 3.6 Hz, 2H), 7.59 (dd, *J* = 6.4, 3.2 Hz, 2H), 7.23-7.21 (m, 4H), 7.16-7.15 (m, 6H). <sup>13</sup>C NMR (100 MHz, CDCl<sub>3</sub>) δ 154.51, 141.54, 135.74, 132.39, 129.15, 129.04, 128.12, 127.19, 126.78, 123.95, 95.24. IR (film): 3064, 1803, 1594, 1499, 1450, 1268, 1221, 1207, 1139, 1039, 1029, 1006, 881, 753, 729, 696 cm<sup>-1</sup>. HRMS (EI) calcd for C<sub>25</sub>H<sub>16</sub>O<sub>3</sub>: 364.1099, found 364.1101.



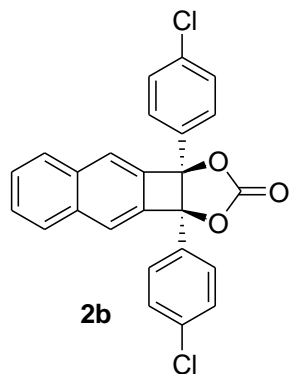

**(3aR\*,9bS\*)-3a,9b-Bis(4-chlorophenyl)-3a,9b-dihydronaphtho[2',3':3,4]cyclobut a[1,2-d][1,3]dioxol-2-one (2b).** Condition A was used. Column chromatography on silica gel (petroleum ether: ethyl acetate =20:1) afforded the title product in 76% (65.6 mg) yield as a white solid. M.p. 239-240 °C.  $^1\text{H}$  NMR (400 MHz,  $\text{CDCl}_3$ )  $\delta$  8.07 (s, 2H), 8.01 (dd,  $J = 6.2, 3.2$  Hz, 2H), 7.64 (dd,  $J = 6.4, 3.2$  Hz, 2H), 7.21-7.14 (m, 8H).  $^{13}\text{C}$  NMR (100 MHz,  $\text{CDCl}_3$ )  $\delta$  154.02, 140.94, 135.88, 135.48, 130.88, 129.25, 128.69, 128.14, 127.52, 124.09, 94.67. IR (film): 3060, 2920, 2849, 1799, 1597, 1505, 1494, 1410, 1399, 1310, 1228, 1206, 1149, 1138, 1094, 1036, 1018, 1004, 885, 839, 797, 767, 754  $\text{cm}^{-1}$ . HRMS (ESI) calcd for  $\text{C}_{25}\text{H}_{14}\text{Cl}_2\text{O}_3\text{Na}$   $[\text{M}+\text{Na}]^+$ : 455.0214, found 455.0212.

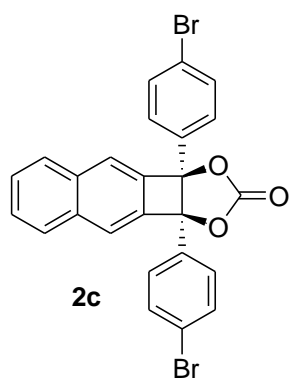

**(3aR\*,9bS\*)-3a,9b-Bis(4-bromophenyl)-3a,9b-dihydronaphtho[2',3':3,4]cyclobut a[1,2-d][1,3]dioxol-2-one (2c).** Condition A: Column chromatography on silica gel (petroleum ether: ethyl acetate =20:1) and recrystallization afforded the title product in 75% yield (77.5 mg) as a white solid. Condition B: Column chromatography on silica gel (petroleum ether: ethyl acetate =20:1) afforded the title product in 62% yield (65.2 mg) as a white solid. M.p. 238-240 °C.  $^1\text{H}$  NMR (400 MHz,  $\text{CDCl}_3$ )  $\delta$  8.07 (s,

2H), 8.01 (dd,  $J = 6.2, 3.2$  Hz, 2H), 7.65 (dd,  $J = 6.0, 3.2$  Hz, 2H), 7.37-7.34 (m, 4H), 7.11-7.08 (m, 4H).  $^{13}\text{C}$  NMR (100 MHz,  $\text{CDCl}_3$ )  $\delta$  153.96, 140.85, 135.84, 131.63, 131.36, 129.23, 128.39, 127.51, 124.06, 123.81, 94.63. IR (film): 3060, 2920, 2846, 1809, 1755, 1597, 1505, 1489, 1410, 1396, 1265, 1220, 1206, 1150, 1140, 1074, 1039, 1012, 920, 882, 841, 820, 765, 753, 737, 699  $\text{cm}^{-1}$ . HRMS (ESI) calcd for  $\text{C}_{25}\text{H}_{14}\text{Br}_2\text{O}_3\text{Na}$   $[\text{M}+\text{Na}]^+$ : 542.9202, found 542.9208.

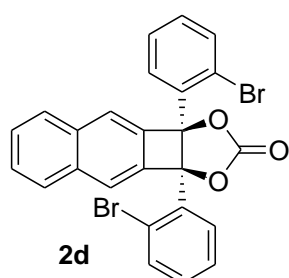

**(3aR\*,9bS\*)-3a,9b-Bis(2-bromophenyl)-3a,9b-dihydronaphtho[2',3':3,4]cyclobut a[1,2-d][1,3]dioxol-2-one (2d).** Condition A was used. Column chromatography on silica gel (petroleum ether: ethyl acetate =20:1) afforded the title product in 72% yield (74.9 mg) as a white solid. M.p. 229-230  $^{\circ}\text{C}$ .  $^1\text{H}$  NMR (400 MHz,  $\text{CDCl}_3$ )  $\delta$  8.12 (dd,  $J = 8.0, 1.2$  Hz, 2H), 8.05 (s, 2H), 7.98 (dd,  $J = 6.2, 3.2$  Hz, 2H), 7.61 (dd,  $J = 6.4, 3.2$  Hz, 2H), 7.38-7.35 (m, 4H), 7.21-7.17 (m, 2H).  $^{13}\text{C}$  NMR (100 MHz,  $\text{CDCl}_3$ )  $\delta$  153.53, 141.65, 135.42, 134.52, 132.25, 131.60, 131.00, 129.26, 127.19, 126.83, 123.37, 121.73, 95.39. IR (film): 3054, 1809, 1590, 1563, 1506, 1471, 1436, 1296, 1282, 1222, 1061, 1032, 1021, 882, 756, 743, 695  $\text{cm}^{-1}$ . HRMS (EI) calcd for  $\text{C}_{25}\text{H}_{14}\text{O}_3\text{Br}_2$ :519.9310, found 519.9314.

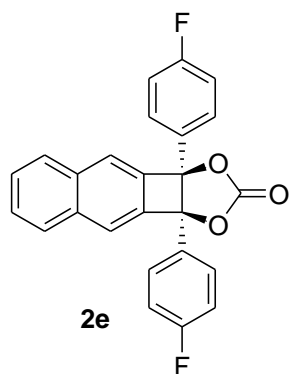



IR (film): 3069, 2926, 2849, 1816, 1620, 1504, 1416, 1328, 1220, 1205, 1169, 1127, 1070, 1041, 1018, 853, 754  $\text{cm}^{-1}$ . HRMS (EI) calcd for  $\text{C}_{27}\text{H}_{14}\text{O}_3\text{F}_6$ : 500.0847, found 500.0848.

Characterization data for **3**:  $^1\text{H}$  NMR (400 MHz,  $\text{CDCl}_3$ ) two isomers:  $\delta$  8.26 (s, 2H), 8.01 (dd,  $J = 5.8, 2.8$ , 2H), 7.63-7.61 (m, 6H), 7.46-7.44 (m, 4H), 7.27-7.26 (m, 6H), 7.12-7.11 (m, 4H), 4.96 and 4.87 (ABq,  $J = 12.0$  Hz, 4H).  $^{13}\text{C}$  NMR (100 MHz,  $\text{CDCl}_3$ ) two isomers:  $\delta$  152.78, 141.22, 139.37, 135.88, 134.64, 130.50 (q,  $^2J_{\text{C-F}} = 32.8$  Hz), 129.24, 128.54, 128.49, 128.08, 127.96, 127.59, 127.02, 126.82, 125.30 (q,  $^3J_{\text{C-F}} = 3.7$  Hz), 124.01 (q,  $^1J_{\text{C-F}} = 271.7$  Hz), 91.92, 69.68. IR (film): 3063, 3030, 2950, 2923, 1751, 1620, 1505, 1456, 1413, 1377, 1326, 1242, 1166, 1114, 1066, 1030, 1018, 946, 889, 850, 802, 787, 752, 706, 696  $\text{cm}^{-1}$ . HRMS (ESI) calcd for  $\text{C}_{42}\text{H}_{28}\text{F}_6\text{O}_6\text{Na}$   $[\text{M}+\text{Na}]^+$ : 765.1713, found 765.1682.

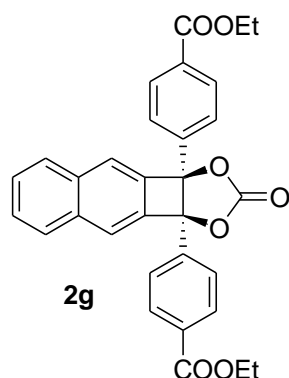

**Diethyl 4,4'-((3aR\*,9bS\*)-2-oxo-3a,9b-dihydronaphtho[2',3':3,4]cyclobuta-**

**[1,2-d][1,3]dioxole-3a,9b-diyl)dibenzoate (2g).** Condition A was used. Column chromatography on silica gel (petroleum ether: ethyl acetate =20:1) afforded the title product in 74% yield (75.2 mg) as a white solid. M.p. 157-159 °C.  $^1\text{H}$  NMR (400 MHz,  $\text{CDCl}_3$ )  $\delta$  8.11 (s, 2H), 8.04 (dd,  $J = 6.0, 3.6$  Hz, 2H), 7.88-7.86 (m, 4H), 7.66 (dd,  $J = 6.2, 3.6$  Hz, 2H), 7.31-7.29 (m, 4H), 4.32 (q,  $J = 7.2$ , 4H), 1.35 (t,  $J = 7.2$ , 6H).  $^{13}\text{C}$  NMR (100 MHz,  $\text{CDCl}_3$ )  $\delta$  165.68, 154.01, 140.80, 136.80, 135.90, 131.22, 129.51, 129.27, 127.56, 126.71, 124.17, 94.81, 61.21, 14.15. IR (film): 3057, 2982, 2959, 2926, 1813, 1718, 1413, 1367, 1276, 1219, 1205, 1108, 1041, 1020, 854, 763, 737  $\text{cm}^{-1}$ . HRMS (ESI) calcd for  $\text{C}_{31}\text{H}_{24}\text{O}_7\text{Na}$   $[\text{M}+\text{Na}]^+$ : 531.1414, found 531.1438.

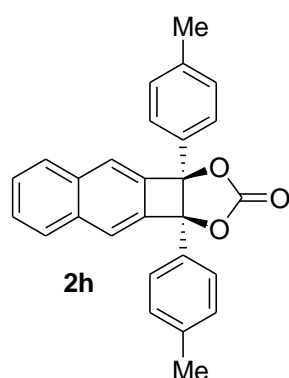

**(3aR\*,9bS\*)-3a,9b-Di-*p*-tolyl-3a,9b-dihydronaphtho[2',3':3,4]cyclobuta[1,2-*d*][1,3]dioxol-2-one (2h).** Condition A was used. Column chromatography on silica gel (petroleum ether: ethyl acetate =10:1) afforded the title product in 82% yield (64.3 mg) as a white solid. M.p. 199-201 °C. <sup>1</sup>H NMR (400 MHz, CDCl<sub>3</sub>) δ 8.04 (s, 2H), 7.98 (dd, *J* = 6.4, 3.2 Hz, 2H), 7.60 (dd, *J* = 6.4, 3.2 Hz, 2H), 7.13-7.11 (m, 4H), 7.00-6.98 (m, 4H), 2.22 (s, 6H). <sup>13</sup>C NMR (100 MHz, CDCl<sub>3</sub>) δ 154.65, 142.01, 138.95, 135.76, 129.57, 129.18, 128.91, 127.12, 126.83, 123.85, 95.38, 21.09. IR (film): 3051, 3024, 2917, 2858, 1801, 1506, 1453, 1415, 1270, 1223, 1186, 1148, 1139, 1038, 1022, 882, 836, 795, 767, 753, 737 cm<sup>-1</sup>. HRMS (EI) calcd for C<sub>27</sub>H<sub>20</sub>O<sub>3</sub>: 392.1412, found 392.1406.

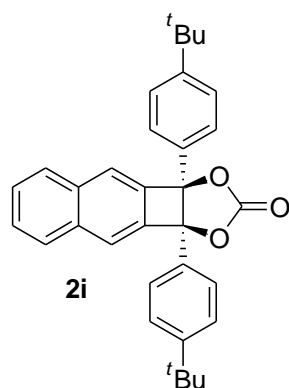

**(3aR\*,9bS\*)-3a,9b-Bis(4-*tert*-butylphenyl)-3a,9b-dihydronaphtho[2',3':3,4]cyclobuta[1,2-*d*][1,3]dioxol-2-one (2i).** Condition A was used. Column chromatography on silica gel (petroleum ether: ethyl acetate =20:1) afforded the title product in 70% yield (66.7 mg) as a white solid. M.p. 179-180 °C. <sup>1</sup>H NMR (400 MHz, CDCl<sub>3</sub>) δ 8.08 (s, 2H), 8.01 (dd, *J* = 6.2, 3.2 Hz, 2H), 7.63 (dd, *J* = 6.6, 3.2 Hz, 2H), 7.17-7.15 (m, 4H),

7.11-7.09 (m, 4H), 1.18 (s, 18H).  $^{13}\text{C}$  NMR (100 MHz,  $\text{CDCl}_3$ )  $\delta$  154.85, 152.09, 141.87, 135.76, 129.54, 129.20, 127.10, 126.57, 124.89, 123.97, 95.33, 34.43, 31.02. IR (film): 3057, 2962, 2868, 1812, 1617, 1590, 1510, 1459, 1413, 1272, 1221, 1040, 1020, 1005, 881, 845, 767, 748  $\text{cm}^{-1}$ . HRMS (EI) calcd for  $\text{C}_{33}\text{H}_{32}\text{O}_3$ : 476.2351, found 476.2348.

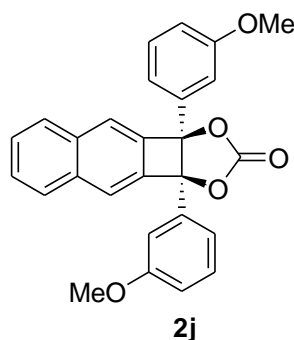

**(3aR\*,9bS\*)-3a,9b-bis(3-methoxyphenyl)-3a,9b-dihydronaphtho[2',3':3,4]cyclobuta[1,2-d][1,3]dioxol-2-one (2j).** Condition B was used. Column chromatography on silica gel (petroleum ether: ethyl acetate =10:1) afforded the title product in 45% yield (38.2 mg) as a white solid. M.p. 208-210 °C.  $^1\text{H}$  NMR (400 MHz,  $\text{CDCl}_3$ )  $\delta$  8.08 (s, 2H), 8.01 (dd,  $J = 6.2, 3.6$  Hz, 2H), 7.63 (dd,  $J = 6.4, 3.2$  Hz, 2H), 7.13-7.09 (m, 2H), 6.83-6.81 (m, 2H), 6.76-6.75 (m, 4H), 3.65 (s, 6H).  $^{13}\text{C}$  NMR (100 MHz,  $\text{CDCl}_3$ )  $\delta$  159.32, 154.51, 141.65, 135.82, 133.99, 129.29, 129.25, 127.25, 123.94, 119.42, 114.81, 112.42, 95.18, 55.24. IR (film): 3072, 3000, 2959, 2911, 2840, 1794, 1748, 1600, 1491, 1465, 1432, 1291, 1226, 1161, 1147, 1136, 1032, 1013, 951, 889, 873, 832, 809, 756, 696  $\text{cm}^{-1}$ . HRMS (MALDI/DHB) calcd for  $\text{C}_{27}\text{H}_{21}\text{O}_5$   $[\text{M}+\text{H}]^+$ : 425.1384, found 425.1383.

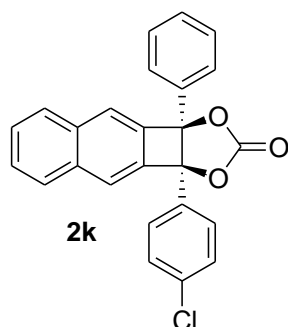

**(3aR\*,9bS\*)-3a-(4-Chlorophenyl)-9b-phenyl-3a,9b-dihydronaphtho[2',3':3,4]cyclobuta[1,2-*d*][1,3]dioxol-2-one (2k).** Condition A was used. Column chromatography on silica gel (petroleum ether: ethyl acetate =20:1) afforded the title product in 76% yield (61.2 mg) as a white solid. M.p. 181-183 °C. <sup>1</sup>H NMR (400 MHz, CDCl<sub>3</sub>) δ 8.09 (s, 1H), 8.06 (s, 1H), 8.02-8.00 (m, 2H), 7.64 (dd, *J* = 6.2, 3.2 Hz, 2H), 7.22 (s, 5H), 7.15 (s, 4H). <sup>13</sup>C NMR (100 MHz, CDCl<sub>3</sub>) δ 154.29, 141.39, 141.24, 135.88, 135.84, 135.21, 132.19, 131.20, 129.36, 129.25, 129.24, 128.47, 128.39, 128.21, 127.40, 127.38, 126.80, 124.18, 123.94, 95.30, 94.68. IR (film): 1797, 1595, 1507, 1495, 1452, 1404, 1268, 1230, 1198, 1089, 1043, 1033, 1005, 886, 836, 811, 757, 734, 693, 678 cm<sup>-1</sup>. HRMS (ESI) calcd for C<sub>25</sub>H<sub>15</sub>O<sub>3</sub>ClNa [M+Na]<sup>+</sup>: 421.0602, found 421.0598.

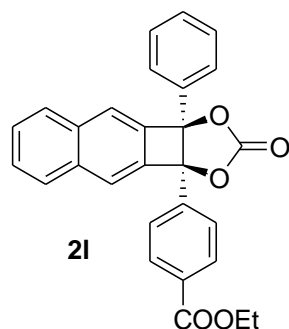

**Ethyl 4-((3aR\*,9bS\*)-2-Oxo-9b-phenyl-3a,9b-dihydronaphtho[2',3':3,4]-cyclobuta[1,2-*d*][1,3]dioxol-3a-yl)benzoate (2l).** Condition A was used. Column chromatography on silica gel (petroleum ether: ethyl acetate =20:1) afforded the title product in 82% yield (71.9 mg) as a white solid. M.p. 199-200 °C. <sup>1</sup>H NMR (400 MHz, CDCl<sub>3</sub>) δ 8.11 (s, 1H), 8.07 (s, 1H), 8.03-8.00 (m, 2H), 7.87-7.85 (m, 2H), 7.65-7.62 (m, 2H), 7.31-7.28 (m, 2H), 7.25-7.18 (m, 5H), 4.30 (q, *J* = 7.2 Hz, 2H), 1.34 (t, *J* = 7.2 Hz, 3H). <sup>13</sup>C NMR (100 MHz, CDCl<sub>3</sub>) δ 165.78, 154.26, 141.30, 141.12, 137.28, 135.84, 132.00, 130.97, 129.35, 129.33, 129.23, 128.35, 127.40, 127.37, 126.80, 126.73, 124.18, 123.96, 95.39, 94.70, 61.12, 14.15. IR (film): 3063, 2956, 2925, 2852, 1811, 1716, 1614, 1593, 1450, 1411, 1277, 1221, 1206, 1140, 1108, 1040, 883, 761, 732, 696 cm<sup>-1</sup>. HRMS (MALDI/DHB) calcd for C<sub>28</sub>H<sub>21</sub>O<sub>5</sub> [M+H]<sup>+</sup>: 437.1384, found 437.1383.

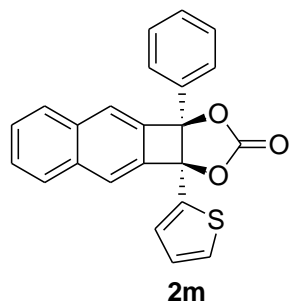

**(3aR\*,9bS\*)-3a-Phenyl-9b-(thien-2-yl)-3a,9b-dihydronaphtho[2',3':3,4]cyclobuta[1,2-*d*][1,3]dioxol-2-one (2m).** Condition B was used. Column chromatography on silica gel (petroleum ether: ethyl acetate =20:1) afforded the title product in 55% yield (40.5 mg) as a little yellow solid. M.p. 191-192 °C. <sup>1</sup>H NMR (400 MHz, CDCl<sub>3</sub>) δ 8.15 (s, 1H), 8.05 (s, 1H), 8.03 -7.99 (m, 2H), 7.64 (dd, *J* = 6.2, 3.6 Hz, 2H), 7.30-7.20 (m, 6H), 6.91-6.90 (m, 1H), 6.84-6.82 (m, 1H). <sup>13</sup>C NMR (100 MHz, CDCl<sub>3</sub>) δ 153.88, 141.91, 141.17, 136.05, 135.79, 135.43, 132.30, 129.32, 129.26, 128.36, 128.21, 128.03, 127.40, 127.32, 126.98, 126.73, 124.02, 123.74, 95.45, 92.84. IR (film): 3101, 3069, 2917, 1805, 1593, 1510, 1451, 1358, 1262, 1240, 1206, 1136, 1028, 875, 848, 764, 738, 711, 698 cm<sup>-1</sup>. HRMS (MALDI/DHB) calcd for C<sub>23</sub>H<sub>15</sub>O<sub>3</sub>S [M+H]<sup>+</sup>: 371.0736, found 371.0731.

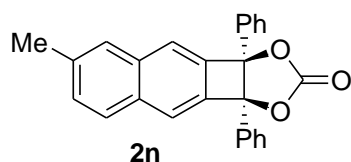

**(3aR\*,9bS\*)-6-Methyl-3a,9b-diphenyl-3a,9b-dihydronaphtho[2',3':3,4]cyclobuta[1,2-*d*][1,3]dioxol-2-one (2n).** Condition B was used. Column chromatography on silica gel (petroleum ether: ethyl acetate =20:1) afforded the title product in 79% yield (60.0 mg) as a white solid. M.p. 213-214 °C. <sup>1</sup>H NMR (400 MHz, CDCl<sub>3</sub>) δ 8.02 (s, 1H), 7.98 (s, 1H), 7.89 (d, *J* = 8.4, 1H), 7.76 (s, 1H), 7.46 (dd, *J* = 8.8, 2.0 Hz, 1H), 7.24-7.15 (m, 10H), 2.57 (s, 3H). <sup>13</sup>C NMR (100 MHz, CDCl<sub>3</sub>) δ 154.68, 141.63, 140.70, 137.24, 136.08, 134.09, 132.57, 132.56, 129.59, 129.03, 128.93, 128.14, 128.12, 126.86, 126.84, 123.71, 123.17, 95.33, 95.27, 21.73. IR (film): 3064, 2922, 1805, 1620, 1593, 1499, 1450, 1319, 1304, 1269, 1226, 1197, 1139, 1041, 1030, 1007,



891, 809, 784, 767, 730, 696, 676  $\text{cm}^{-1}$ . HRMS (MALDI/DHB) calcd for  $\text{C}_{26}\text{H}_{19}\text{O}_3$   $[\text{M}+\text{H}]^+$ : 379.1329, found 379.1328.

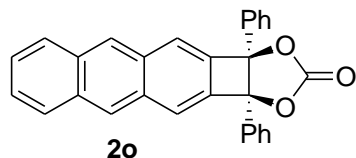

**(3aR\*,11bS\*)-3a,11b-Diphenyl-3a,11b-dihydroanthra[2',3':3,4]cyclobuta[1,2-d][1,3]dioxol-2-one (2o).** Condition A: Column chromatography on silica gel (petroleum ether: ethyl acetate =20:1) afforded the title product in 44% yield (36.5 mg) as a little yellow solid. Condition B: Column chromatography on silica gel (petroleum ether: ethyl acetate =20:1) afforded the title product in 77% yield (63.9 mg) as a little yellow solid. M.p. 236-237 °C.  $^1\text{H}$  NMR (400 MHz,  $\text{CDCl}_3$ )  $\delta$  8.54 (s, 2H), 8.18 (s, 2H), 8.02 (dd,  $J = 6.4, 3.2$  Hz, 2H), 7.53 (dd,  $J = 6.4, 3.2$  Hz, 2H), 7.27-7.25 (m, 4H), 7.19-7.16 (m, 6H).  $^{13}\text{C}$  NMR (100 MHz,  $\text{CDCl}_3$ )  $\delta$  154.67, 140.76, 133.05, 132.46, 132.04, 129.10, 128.18, 128.08, 128.06, 126.85, 126.44, 124.31, 95.48. IR (film): 3059, 1813, 1580, 1498, 1450, 1421, 1301, 1220, 1149, 1041, 1005, 901, 781, 740, 718, 696  $\text{cm}^{-1}$ . HRMS (ESI) calcd for  $\text{C}_{29}\text{H}_{18}\text{O}_3\text{Na}$   $[\text{M}+\text{Na}]^+$ : 437.1148, found 437.1131.

### Reference:

- (1) P. Braunstein, H. Lehner and D. Matt, *Inorg. Synth.* **1990**, 27, 218.
- (2) N. Mezailles, L. Ricard and F. Gagosz, *Org. Lett.* **2005**, 7, 4133.
- (3) M. Chen, Y. Chen and Y. Liu, *Chem. Commun.*, **2012**, 48, 12189.

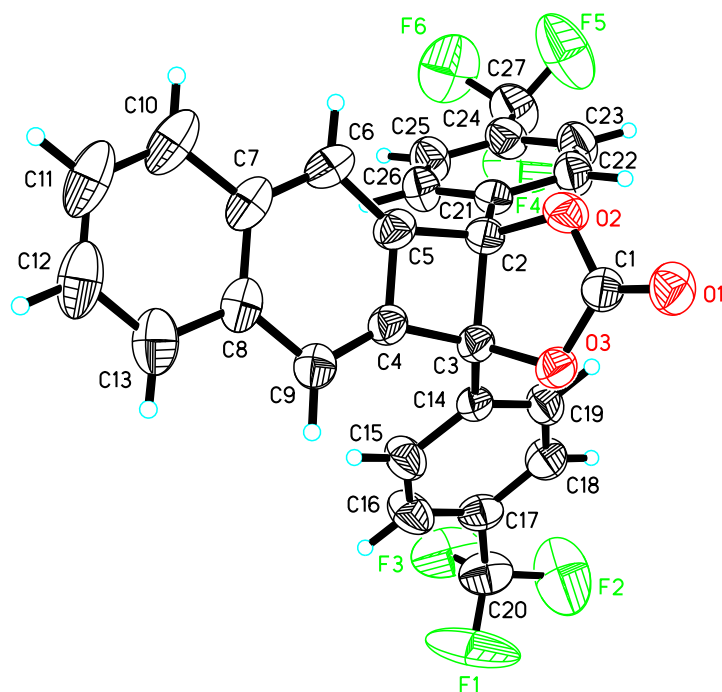

X-ray crystal structure of compound **2f** (fluoro atoms on  $\text{CF}_3$  groups are disordered)

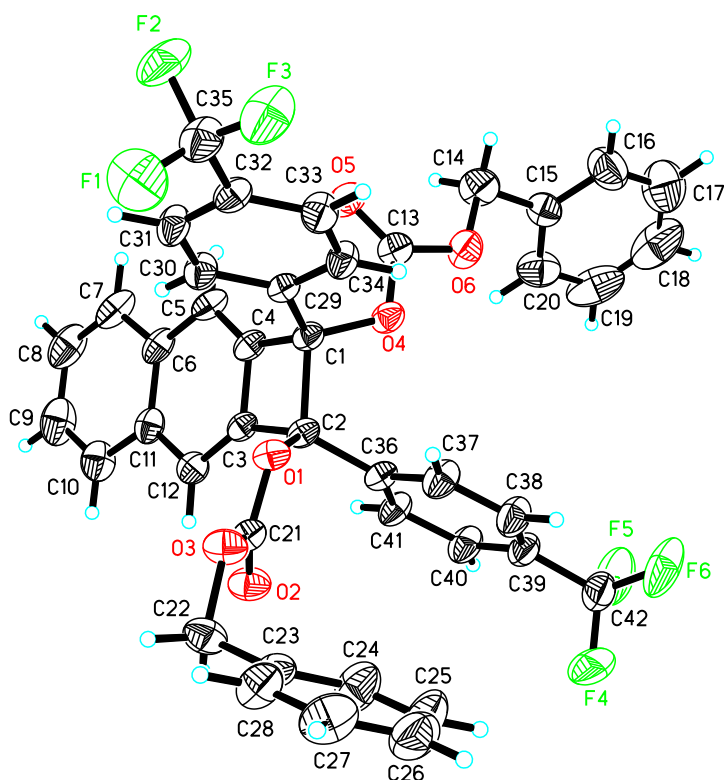

X-ray crystal structure of the *trans*-isomer of **3** (fluoro atoms on one of the  $\text{CF}_3$  groups are disordered)

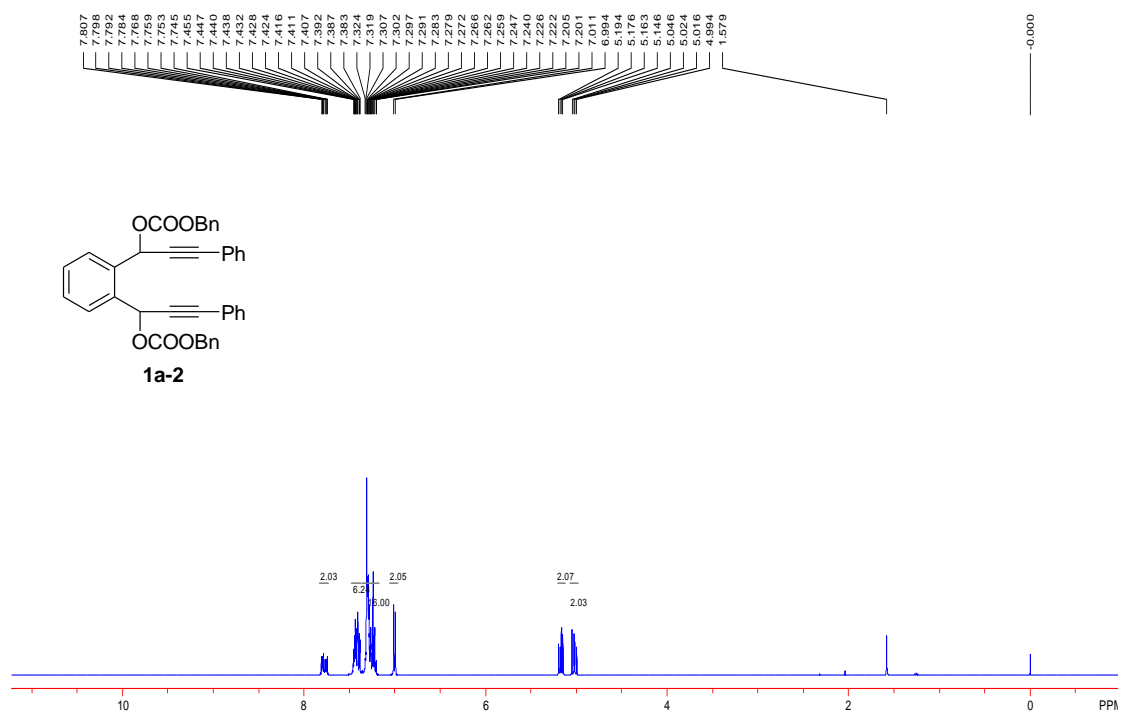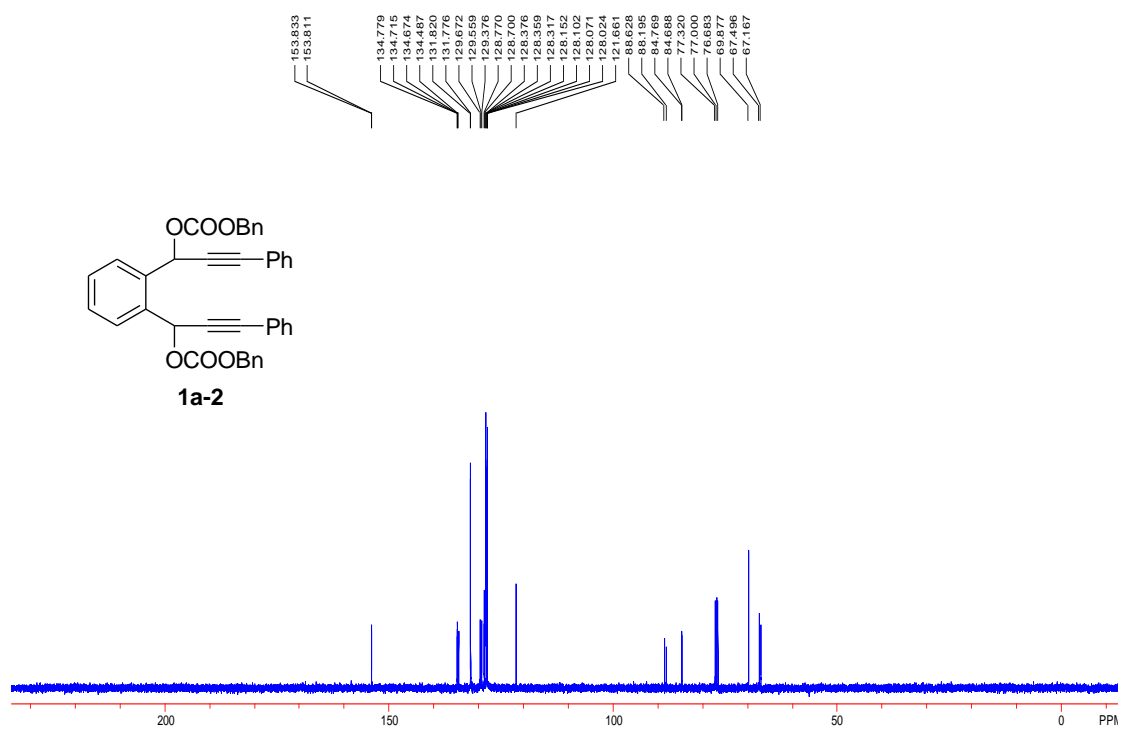

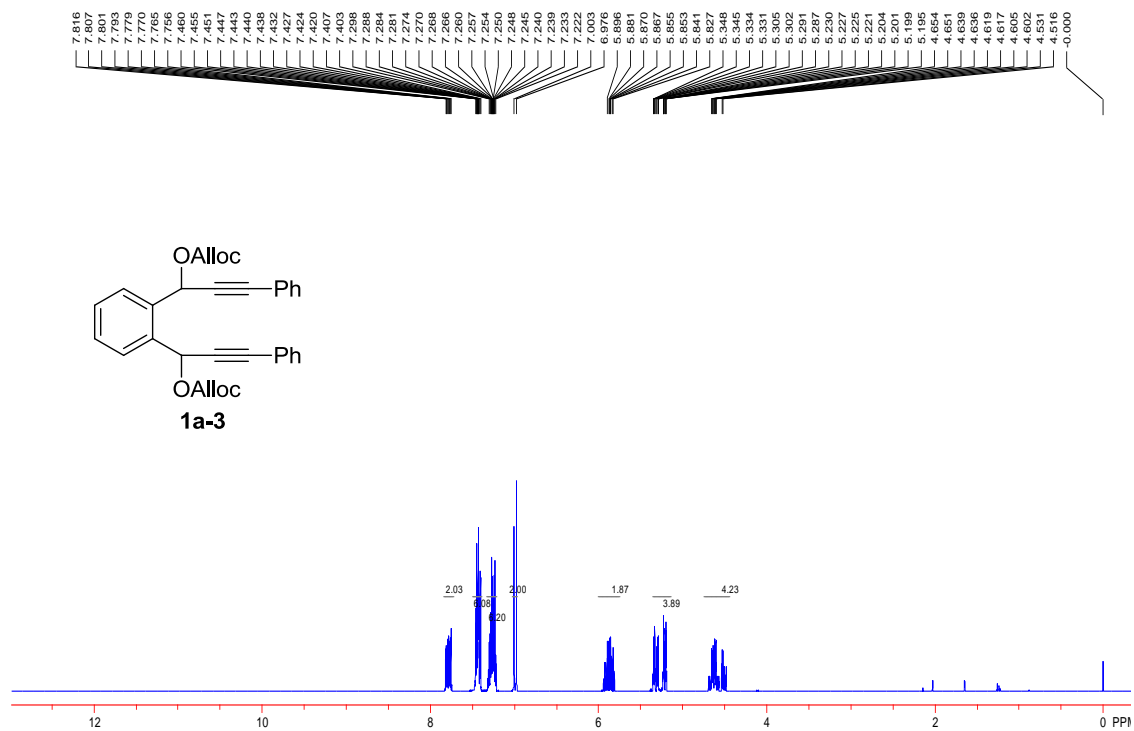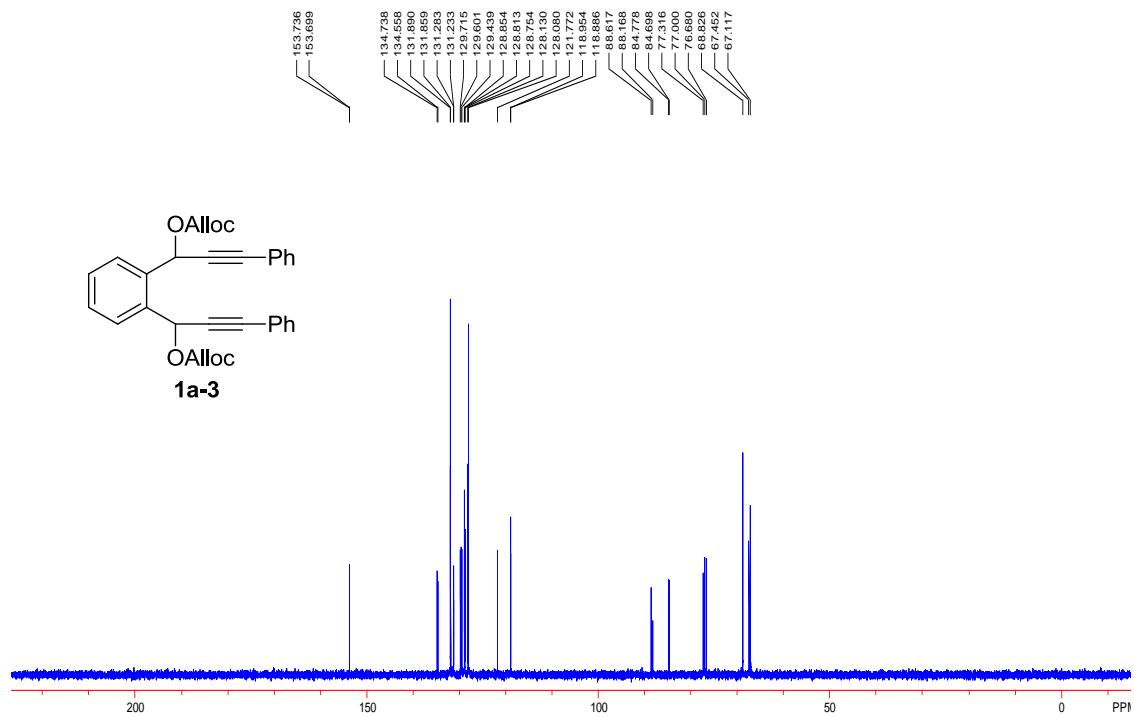

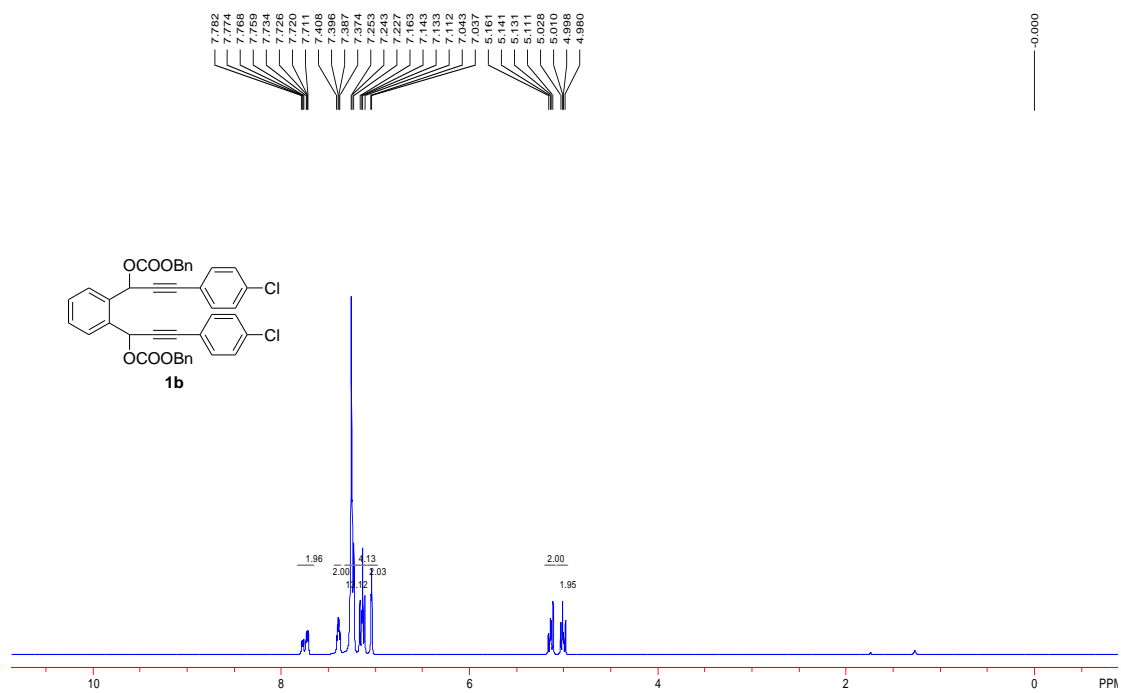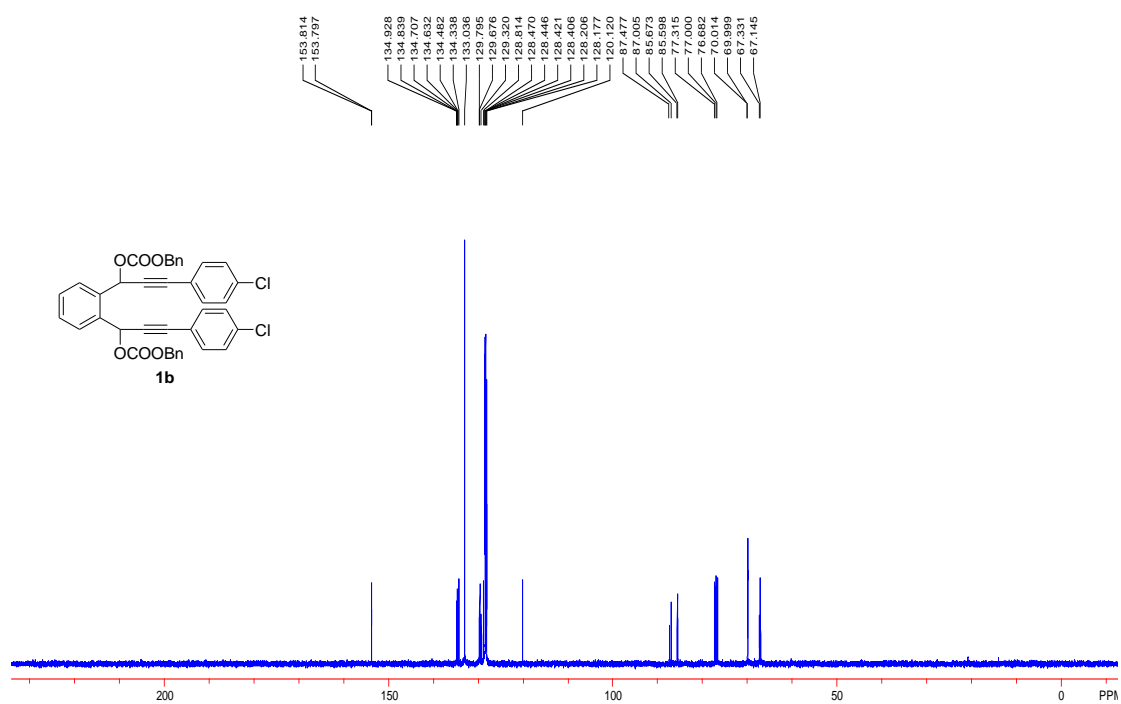

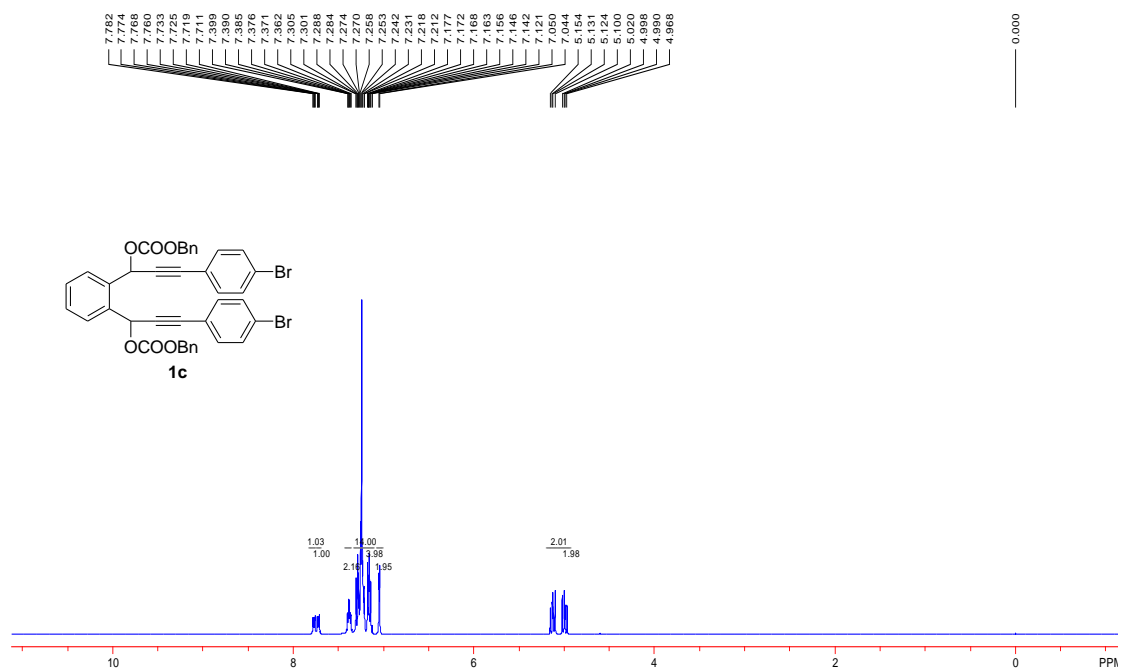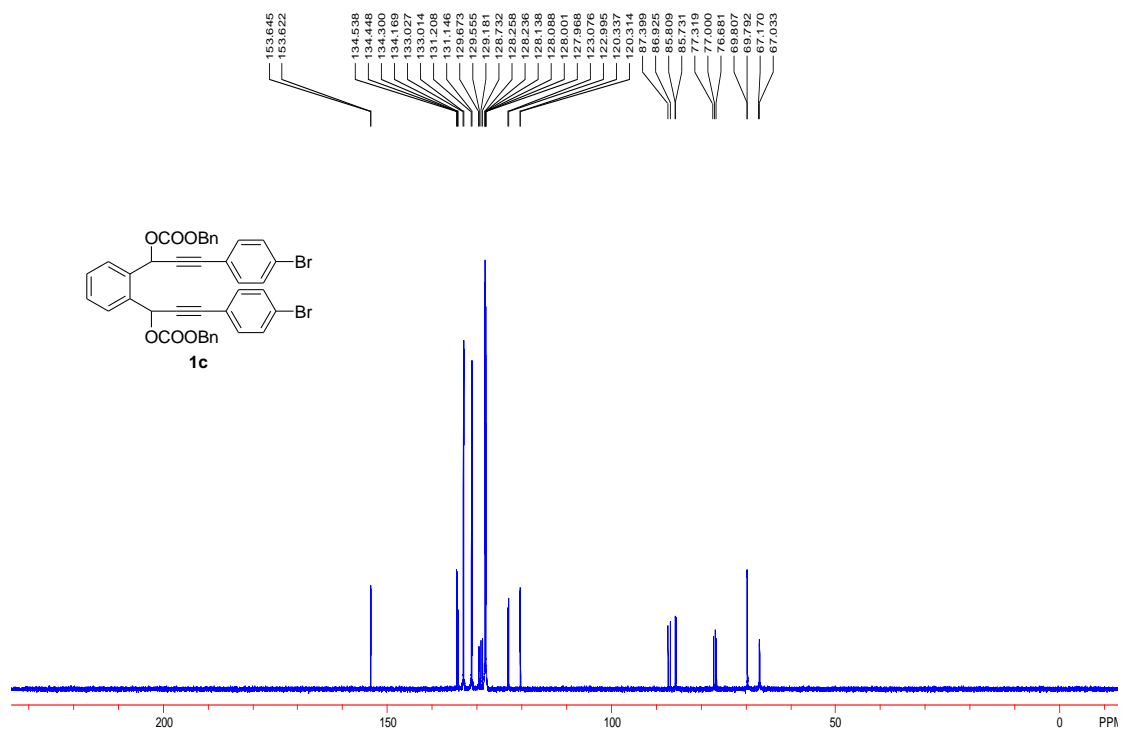

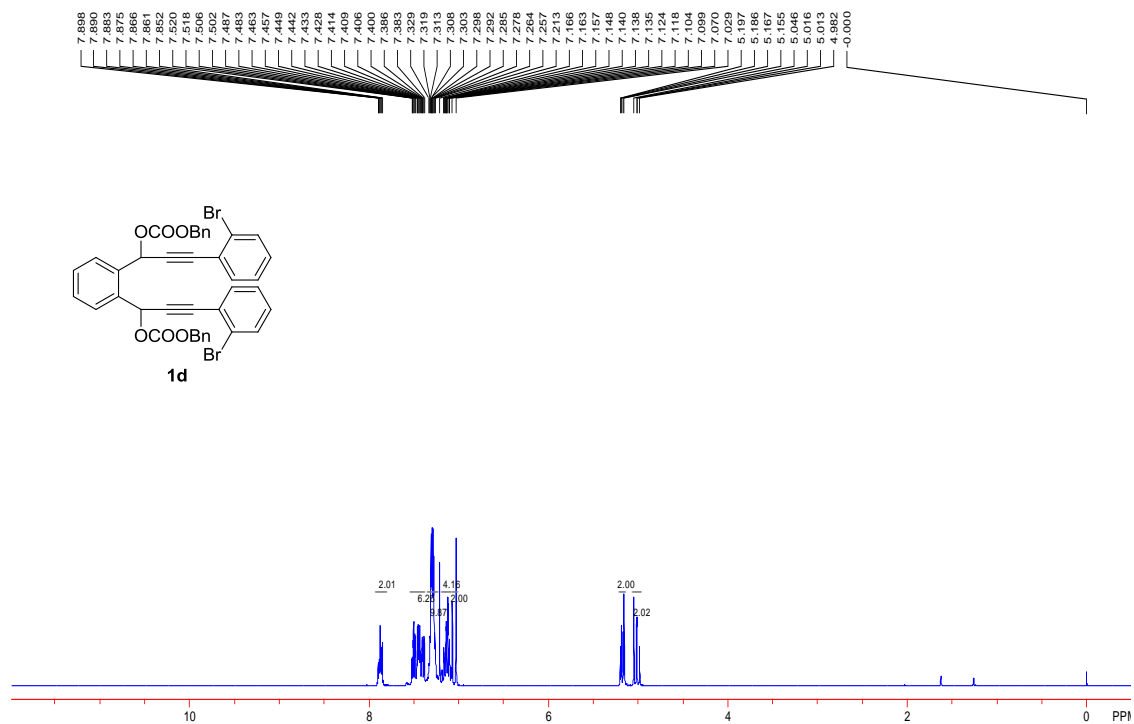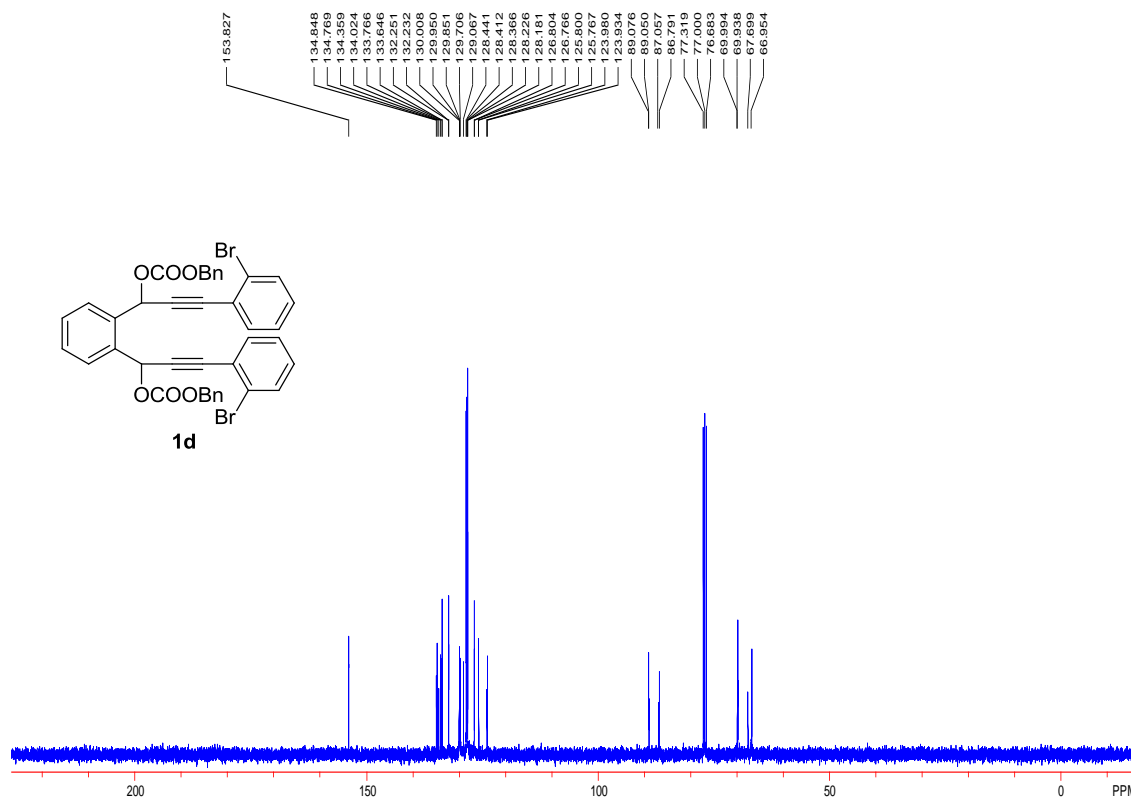

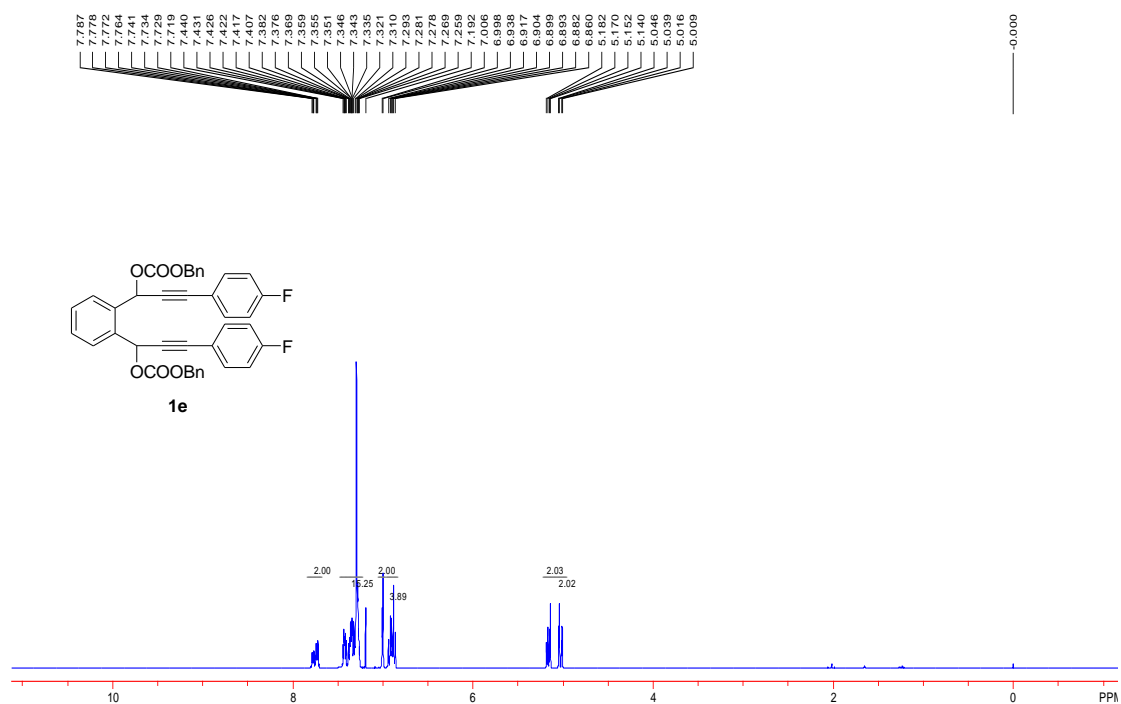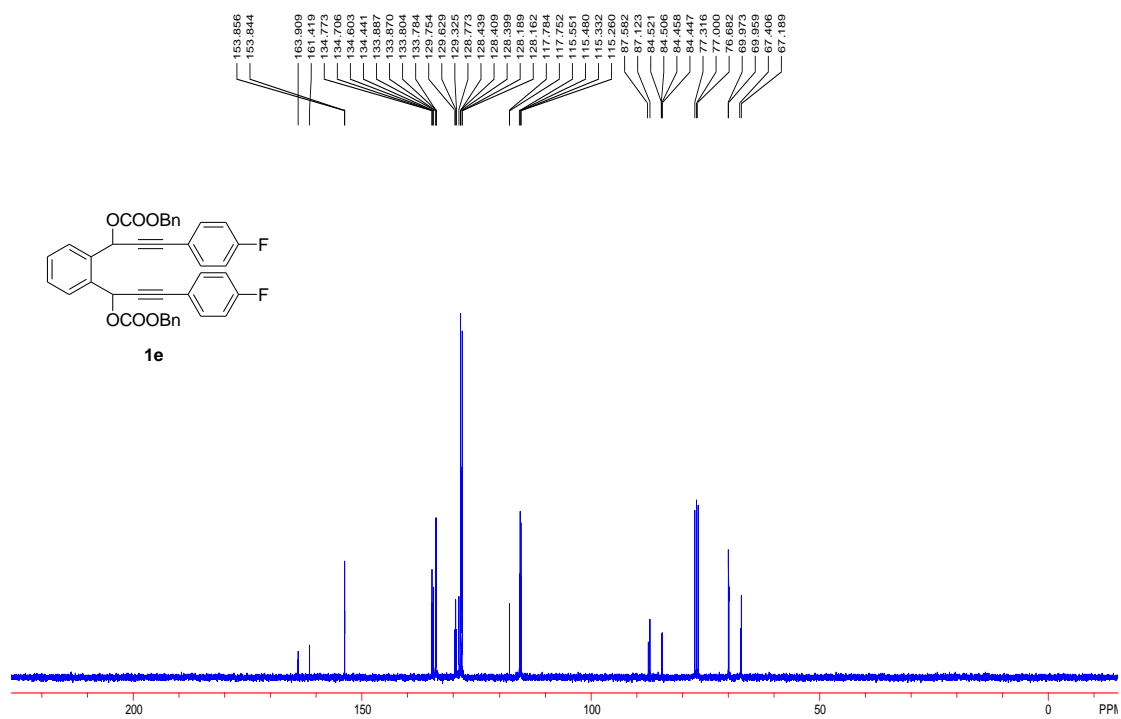



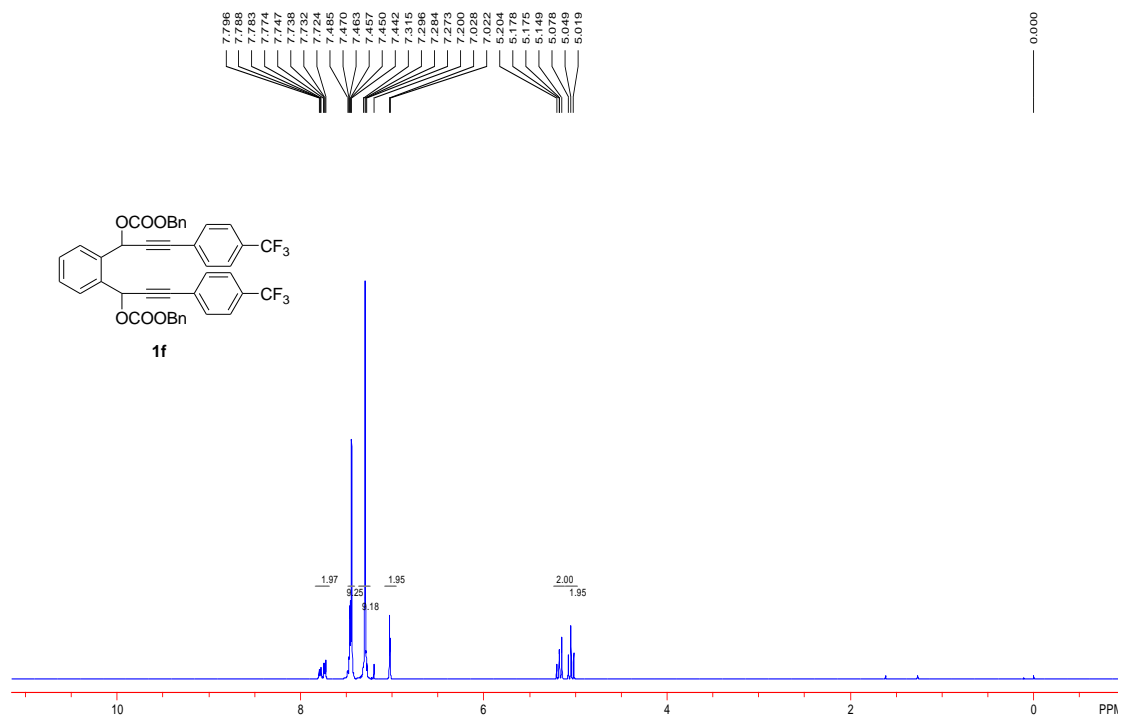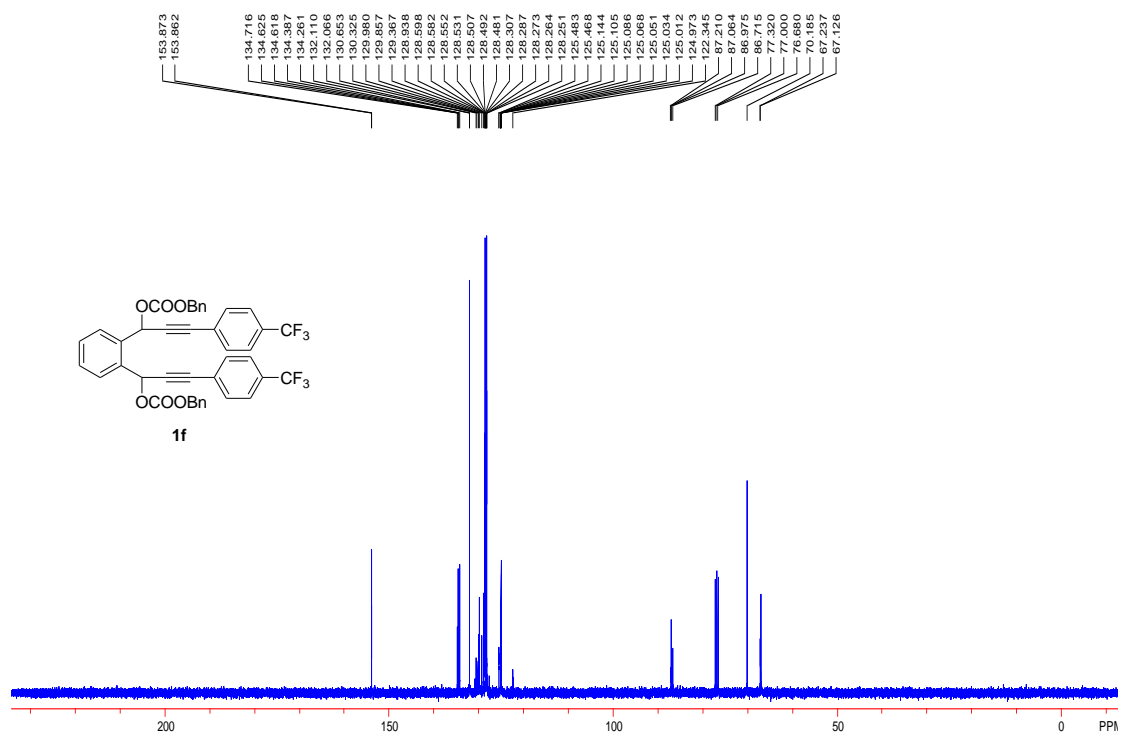

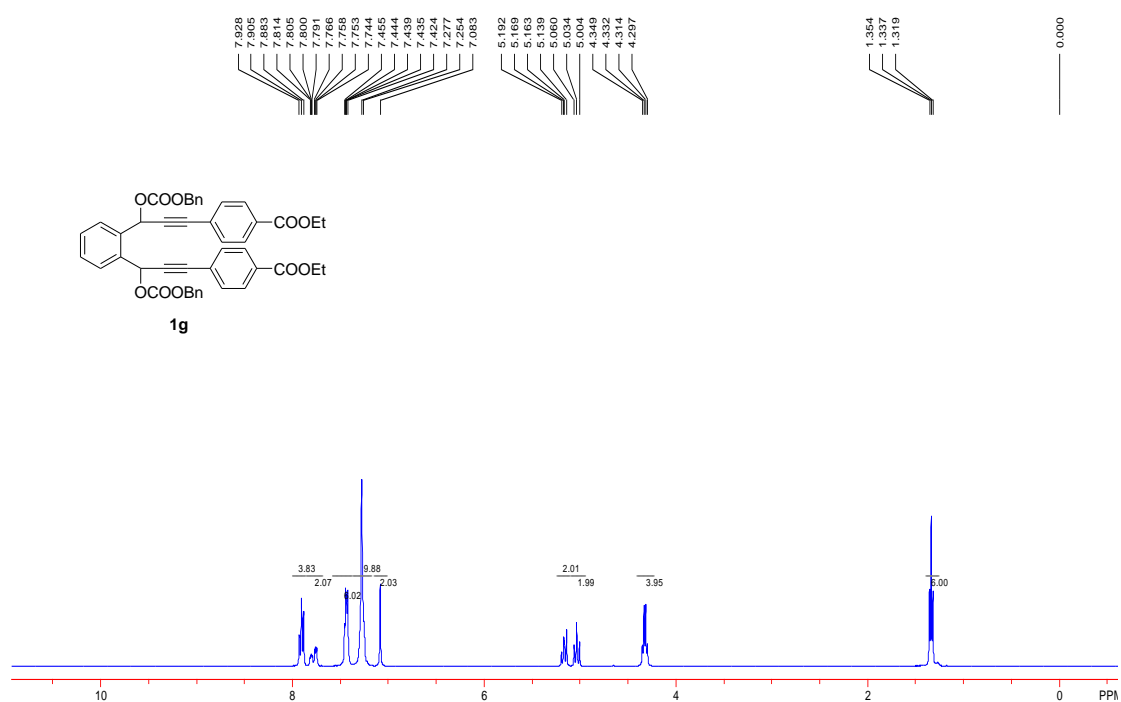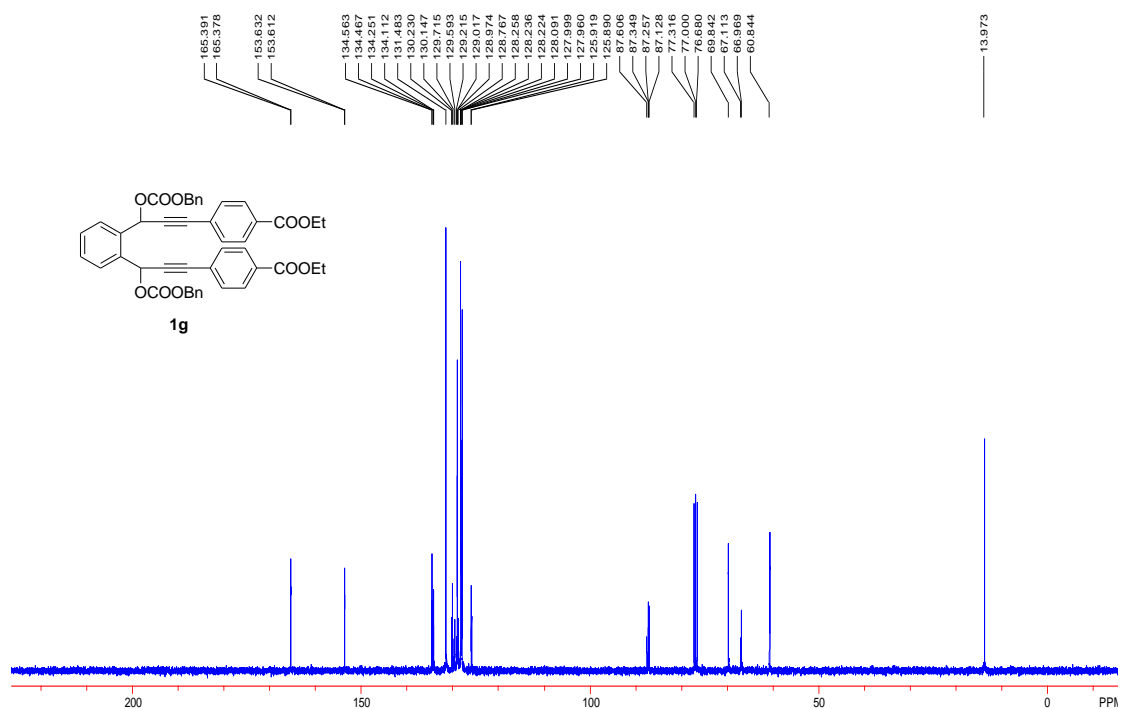

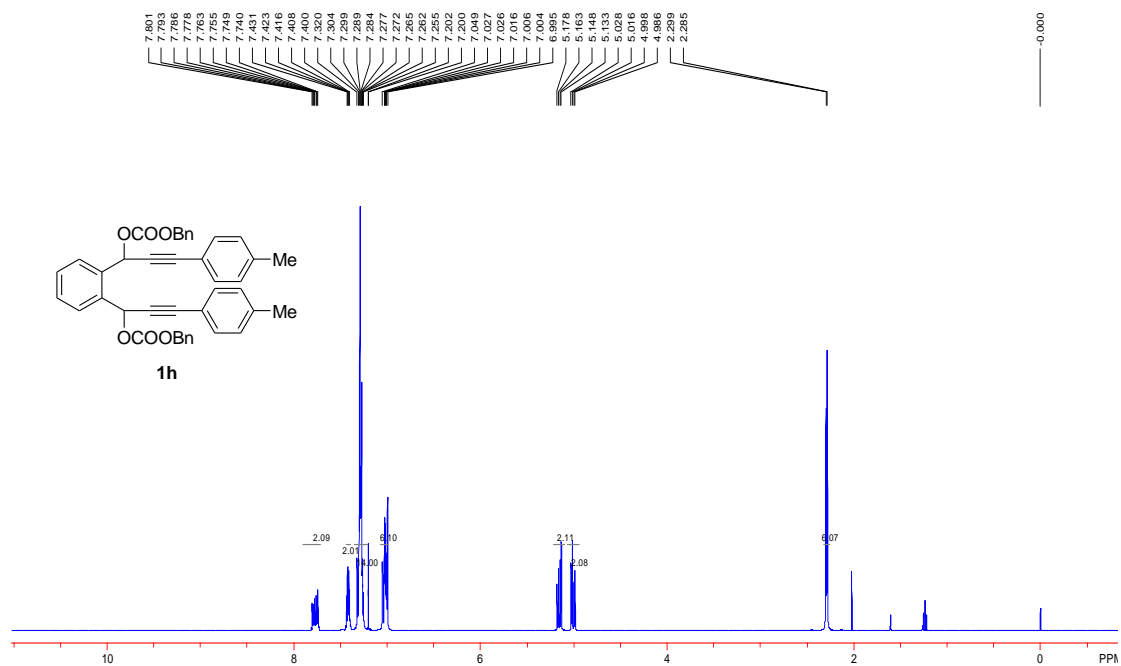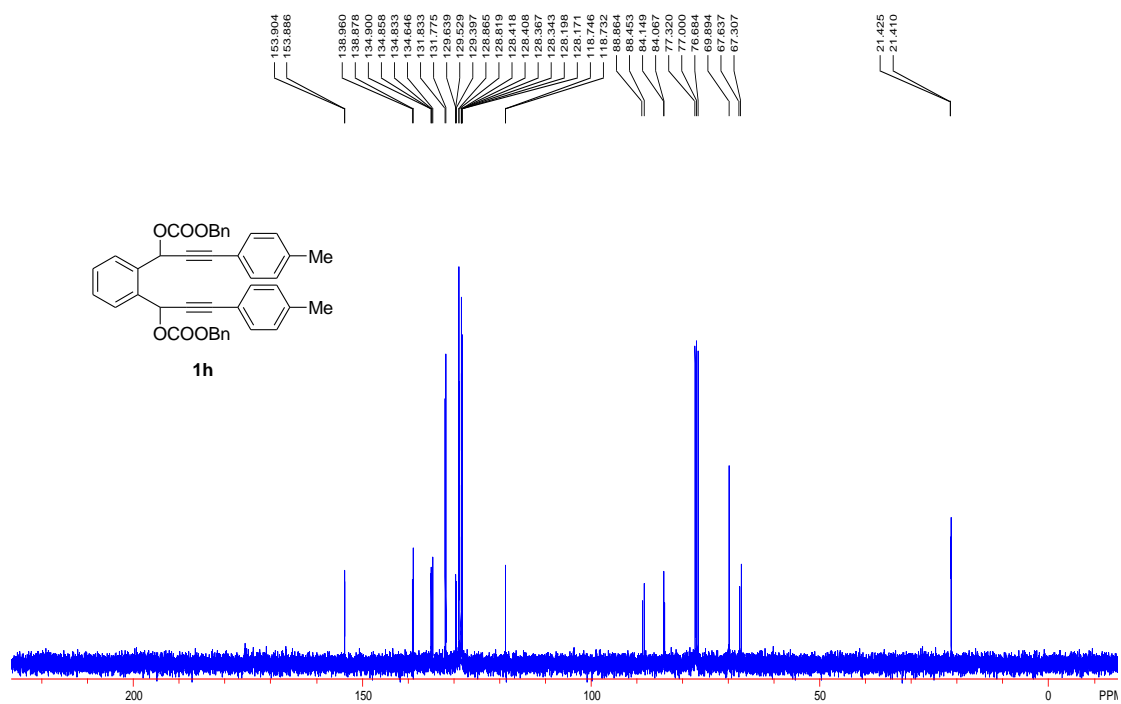

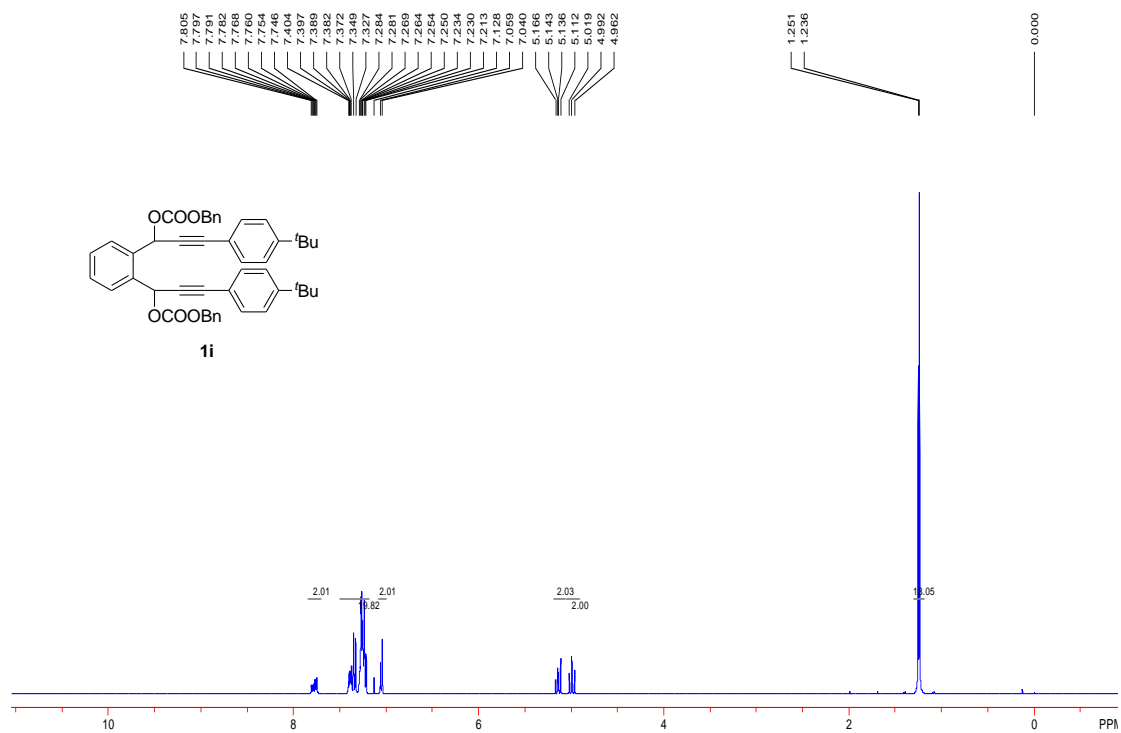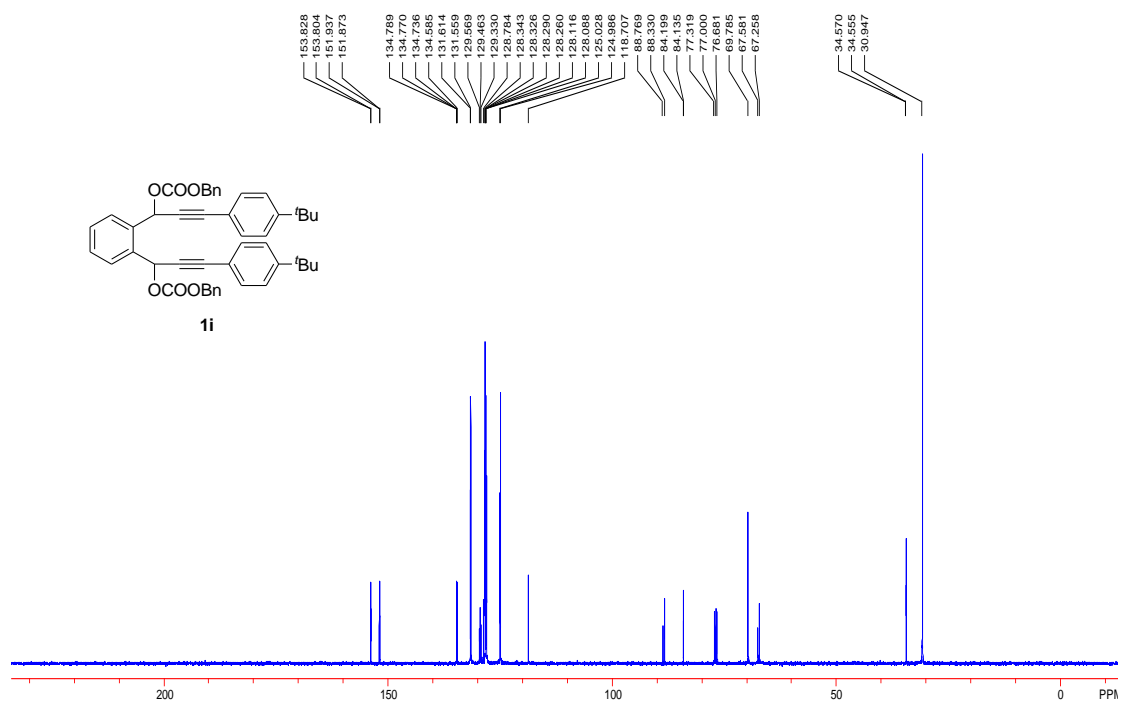

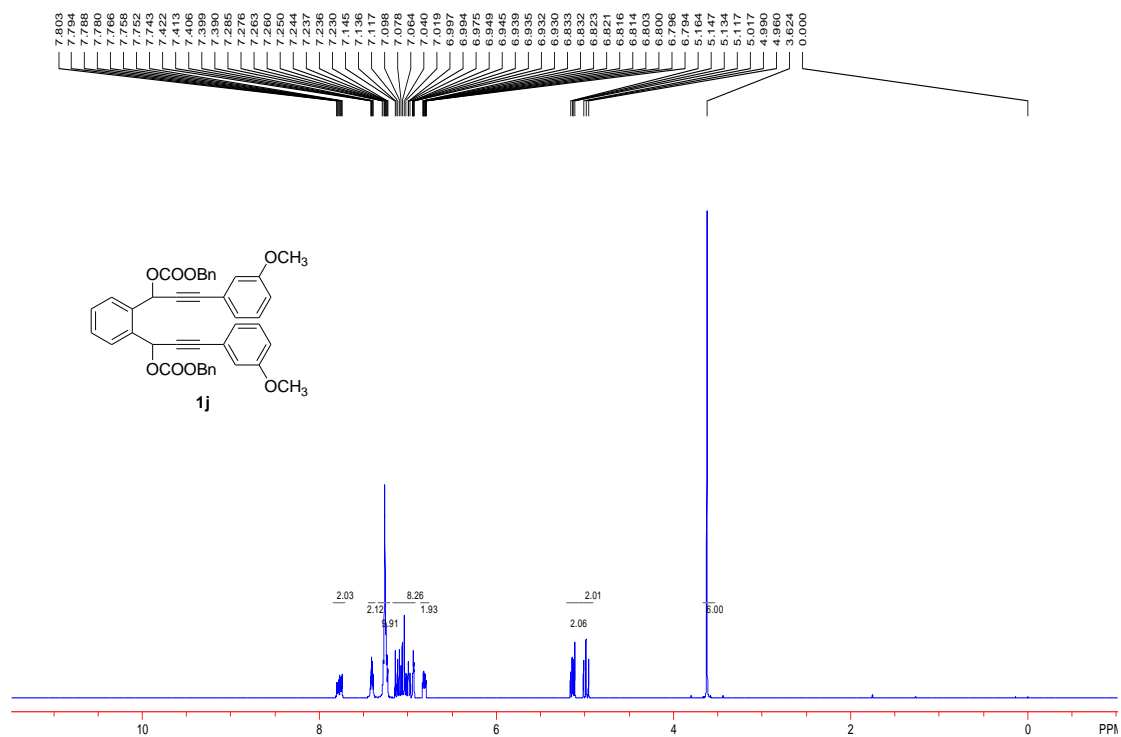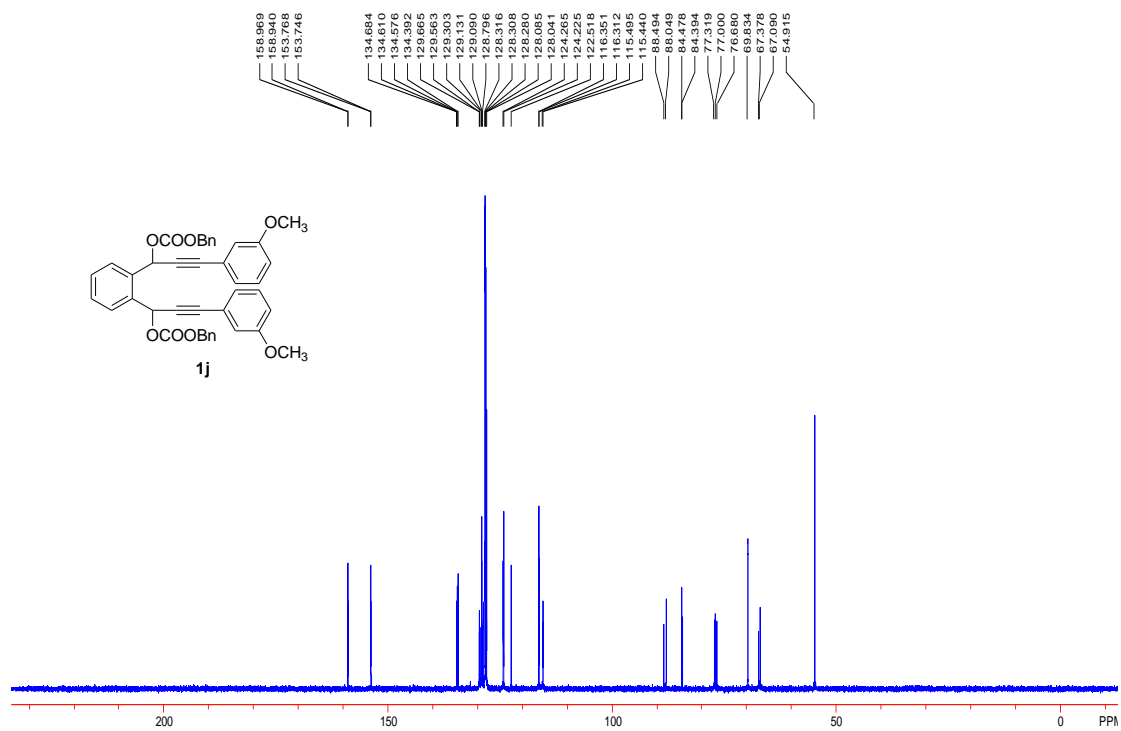

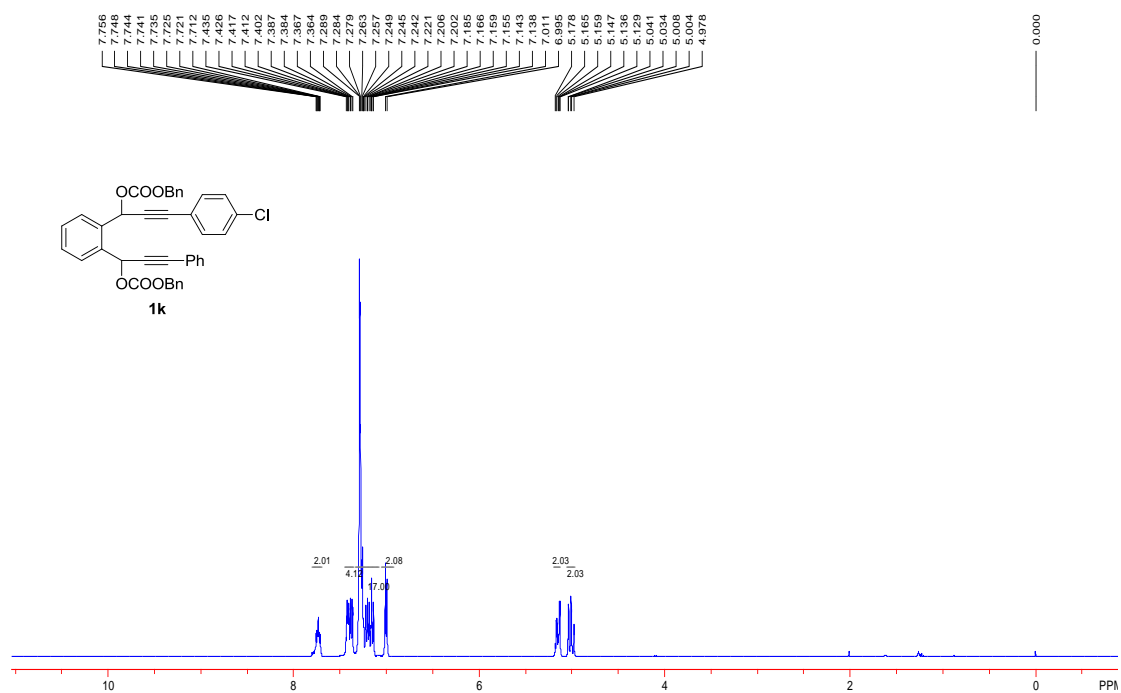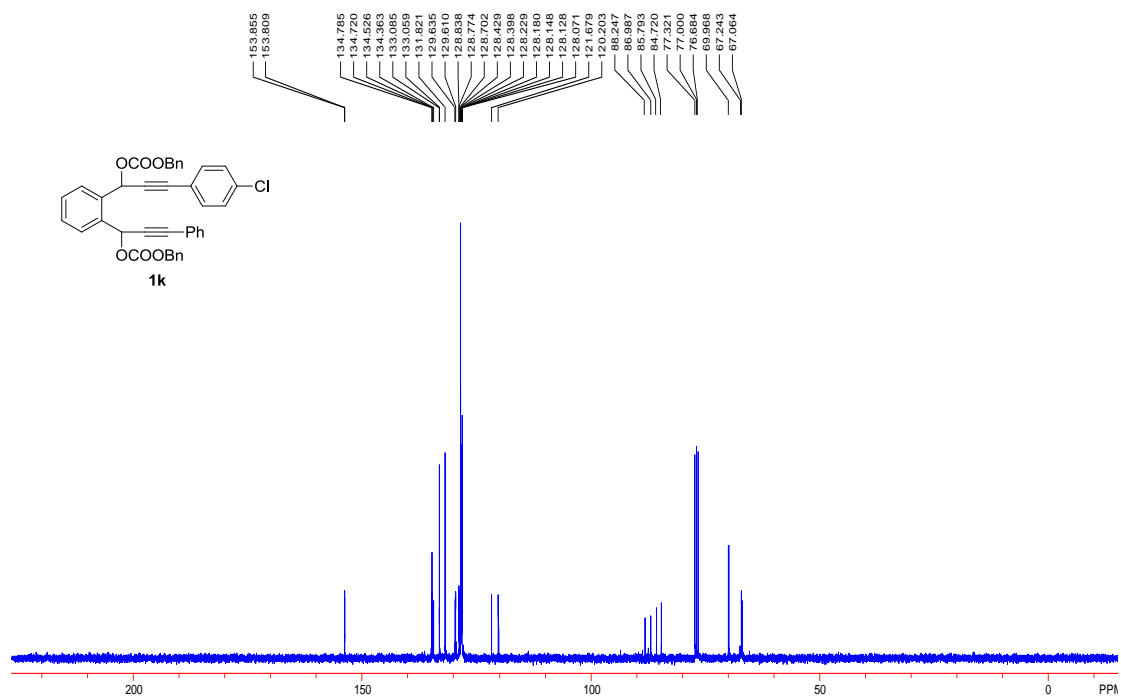

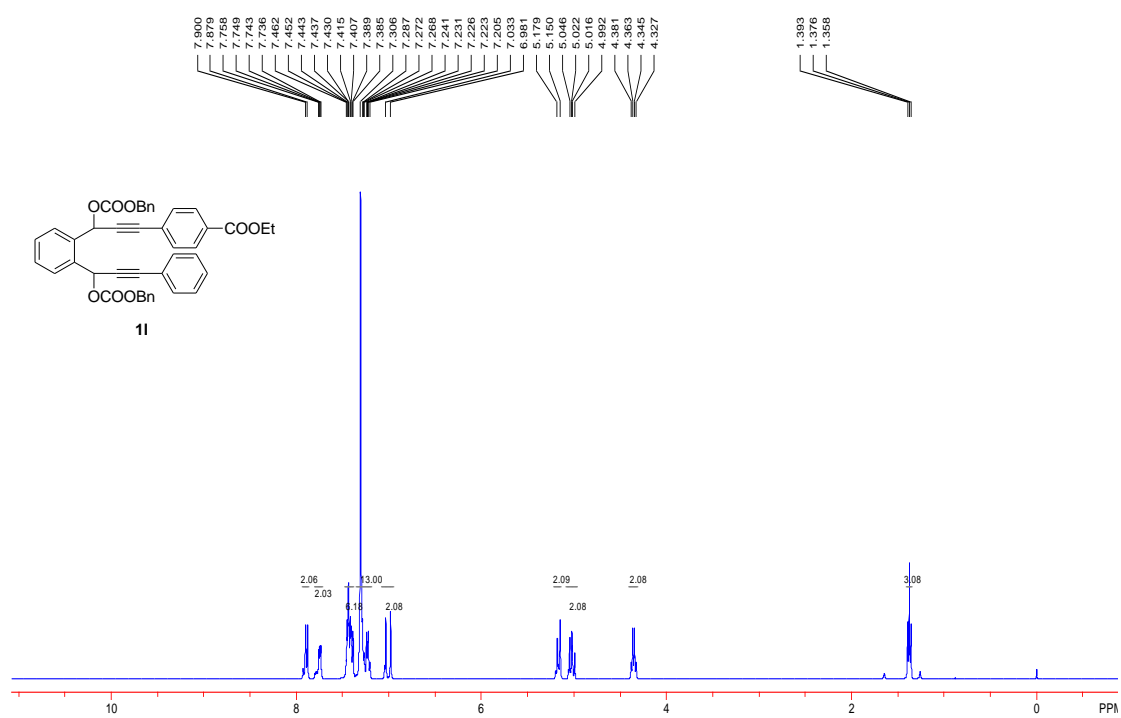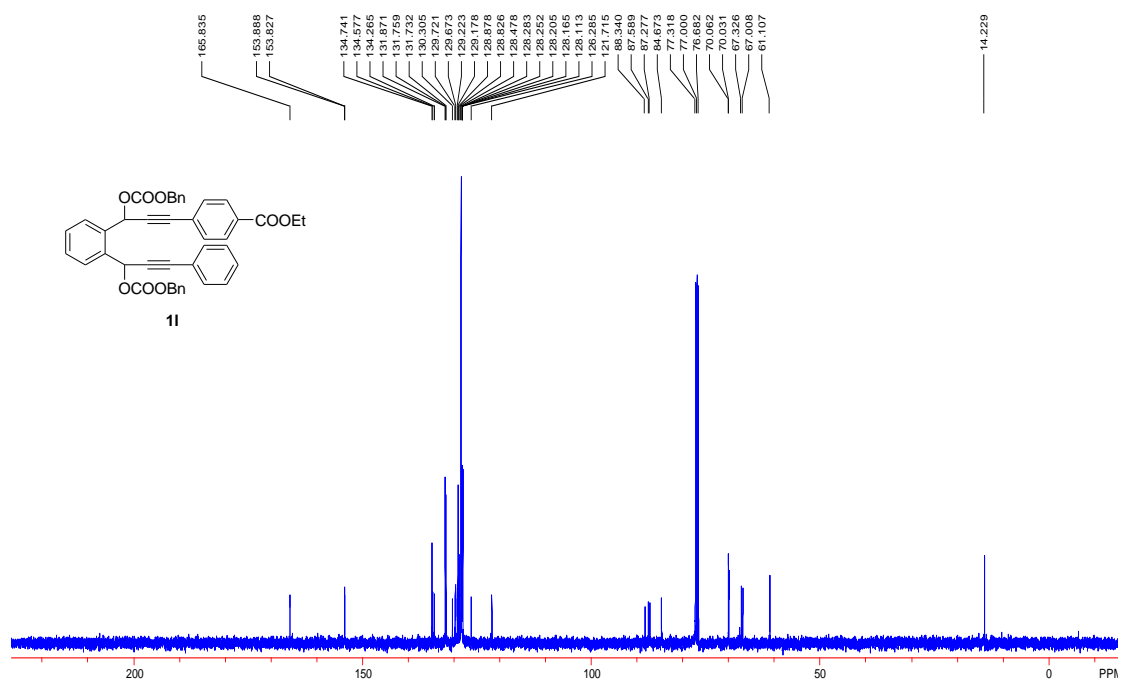

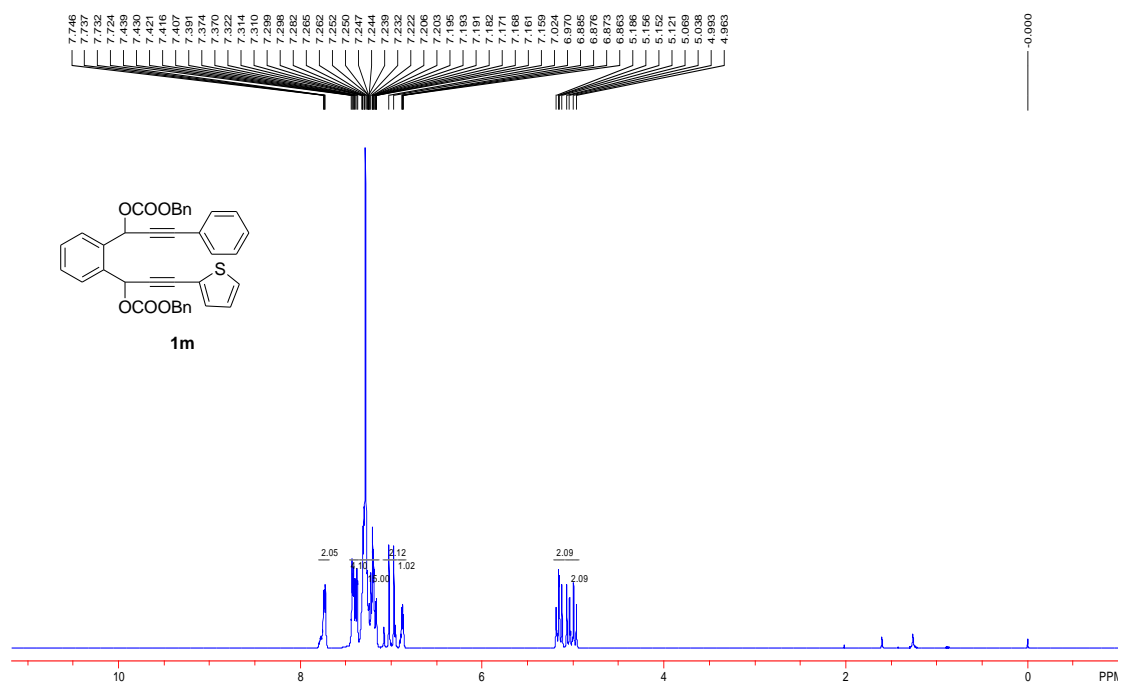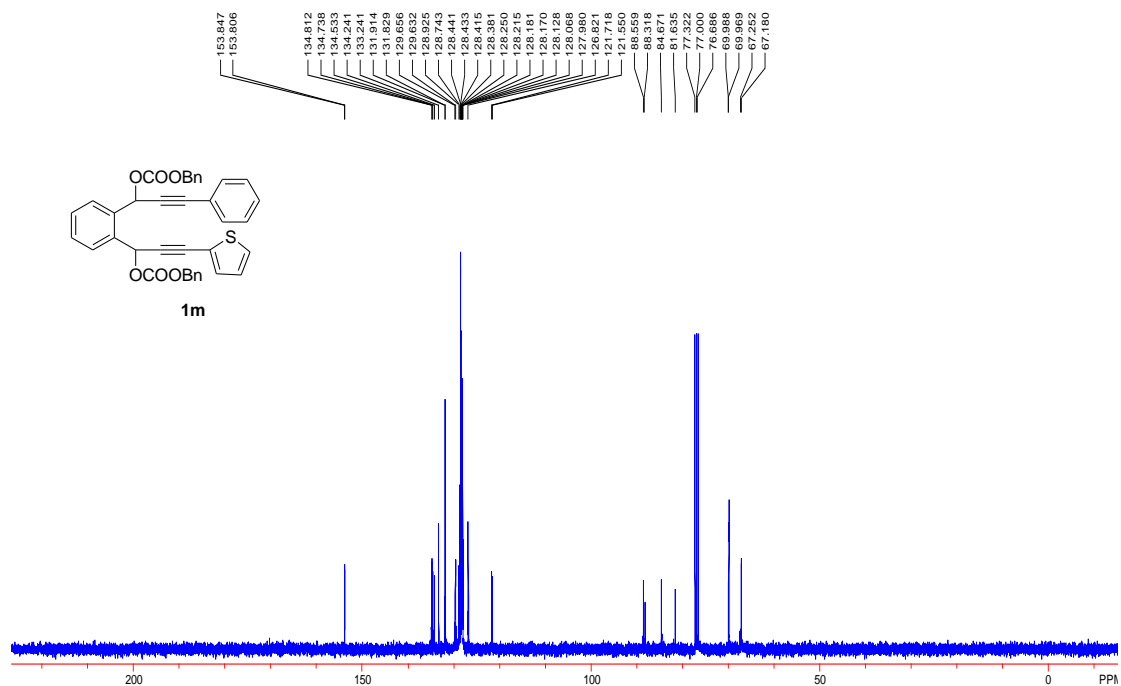



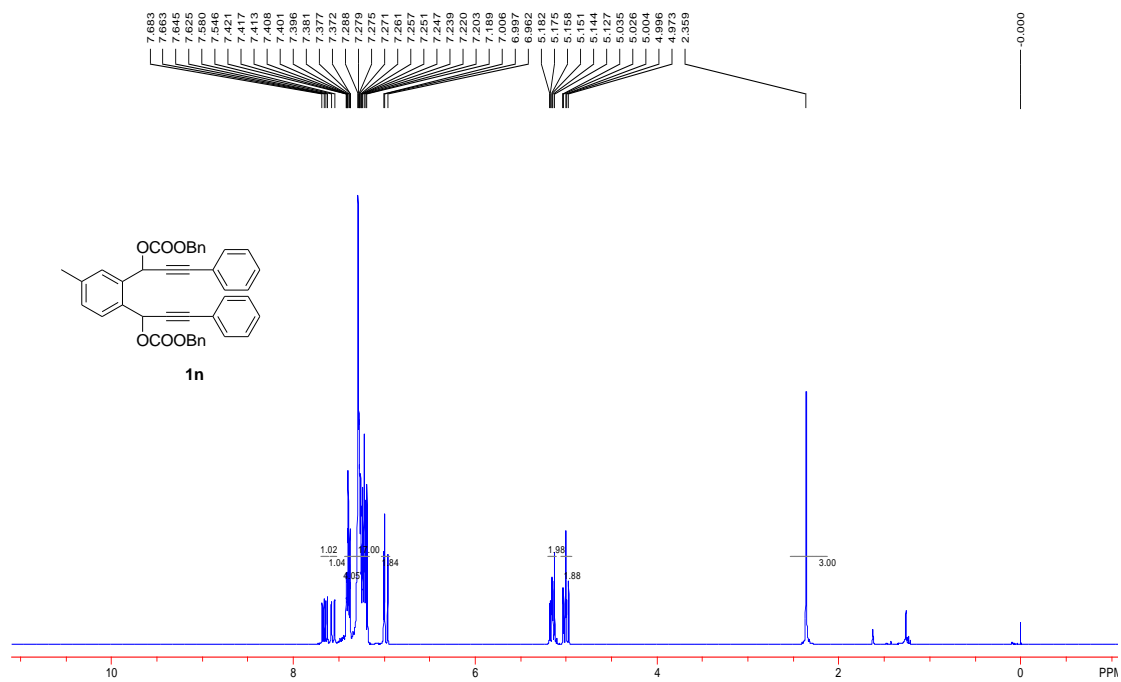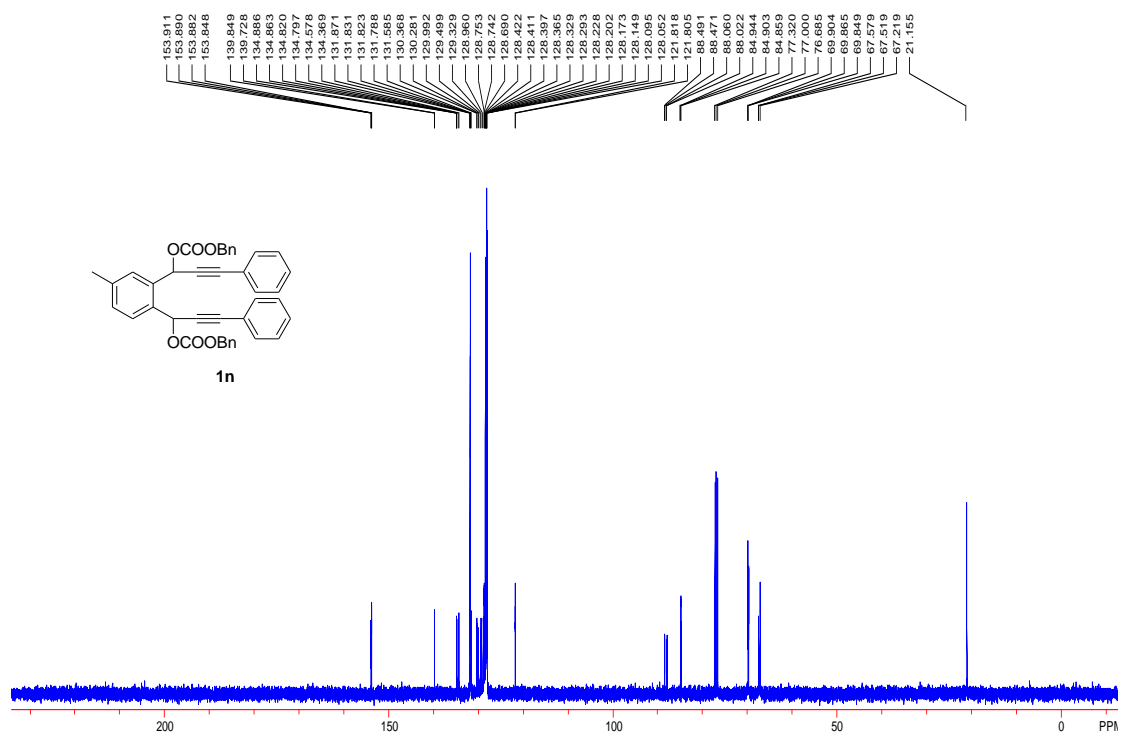

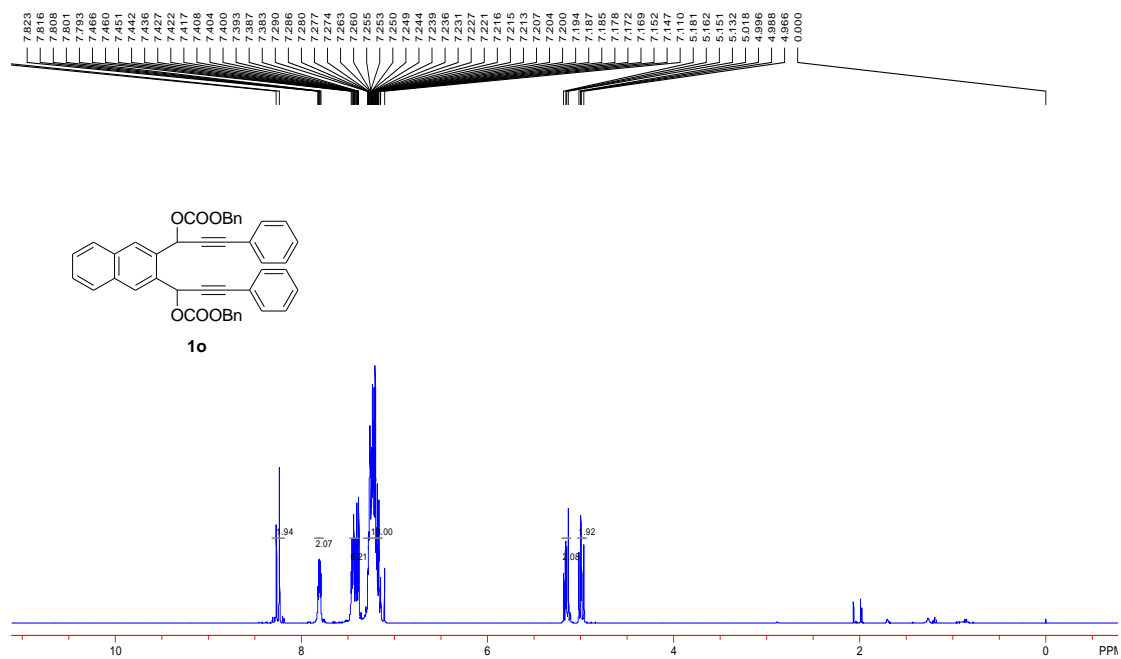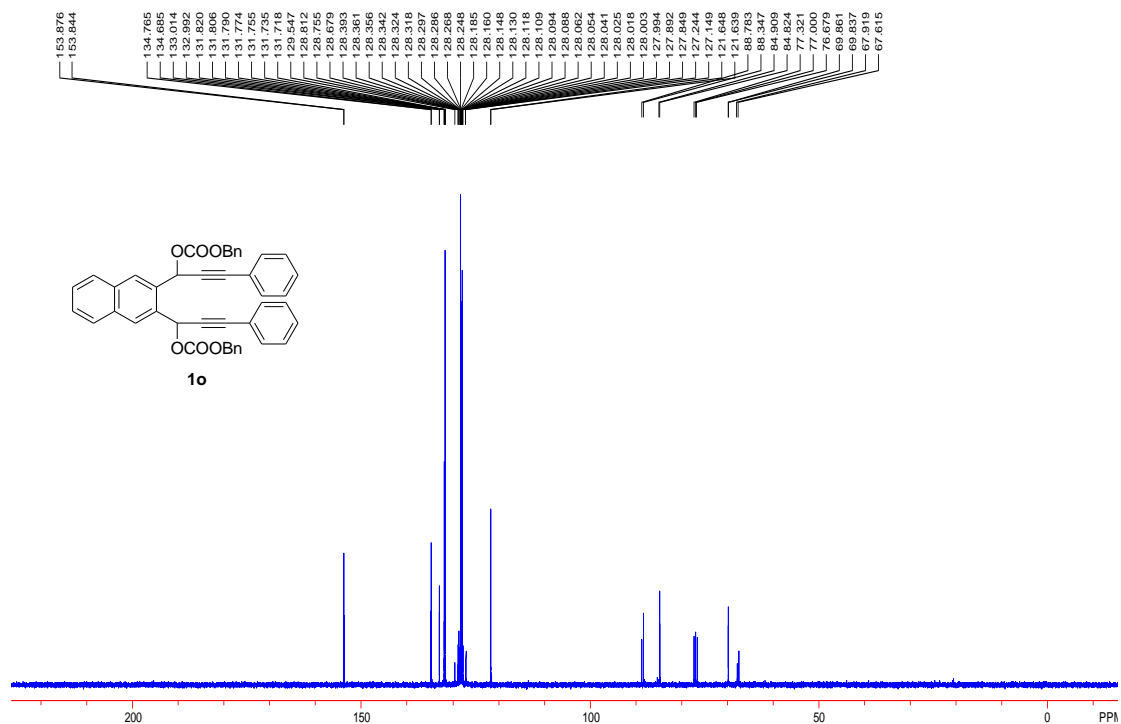

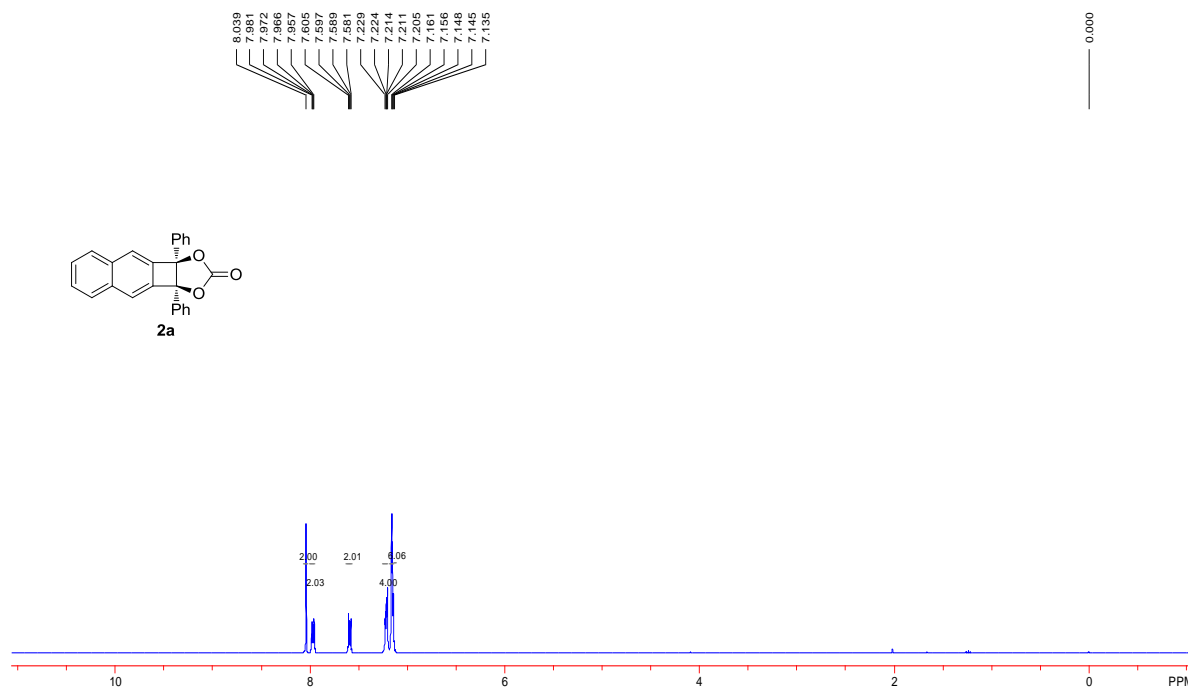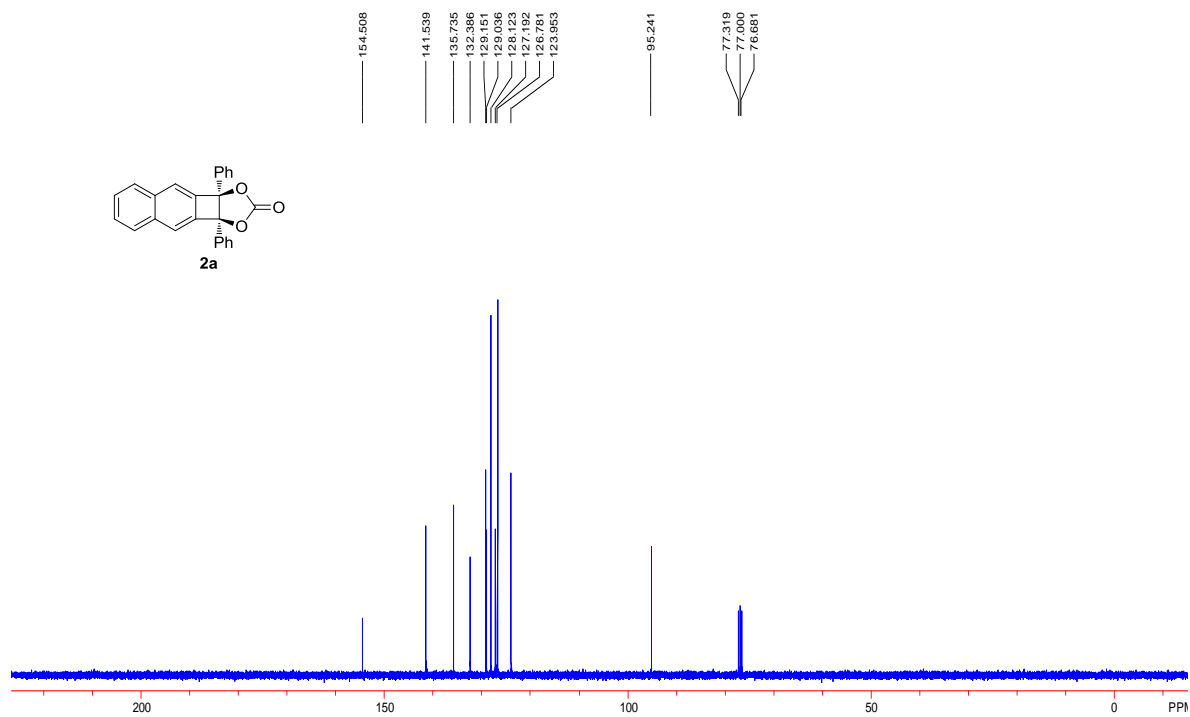

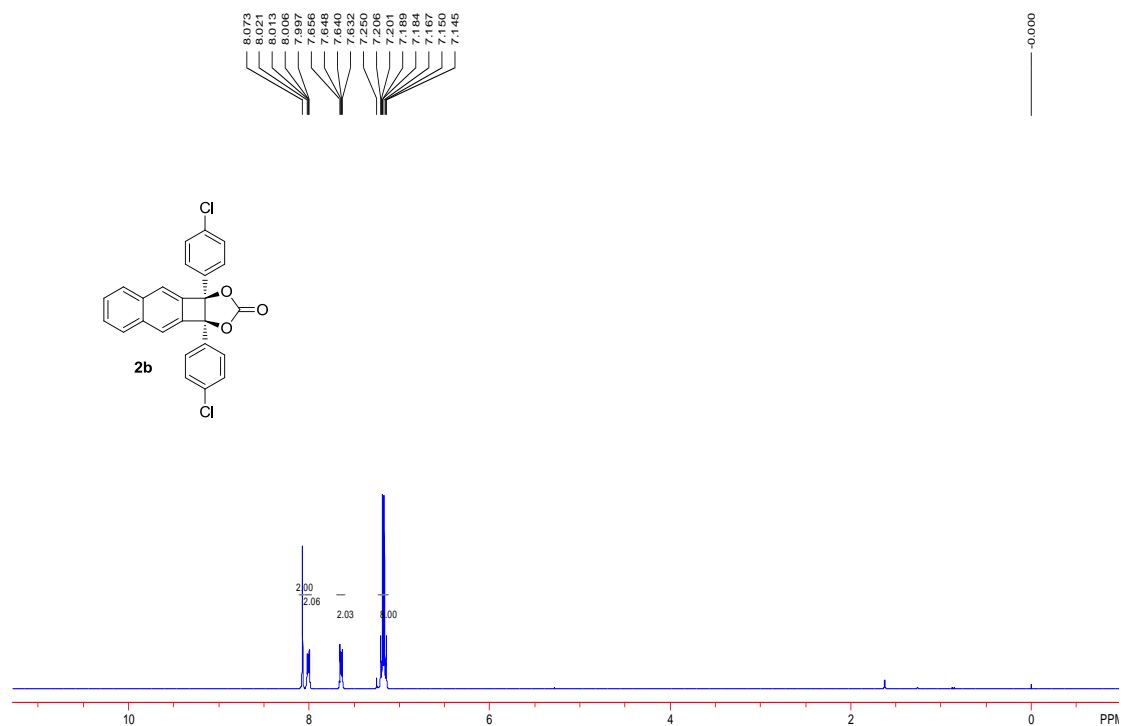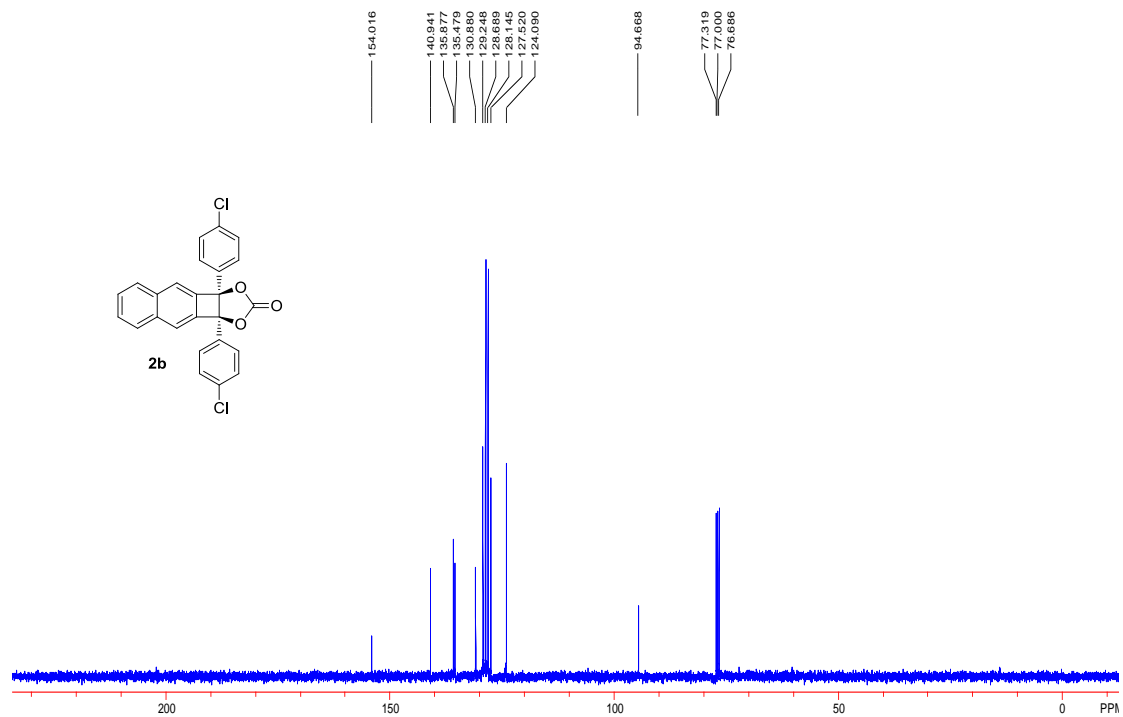

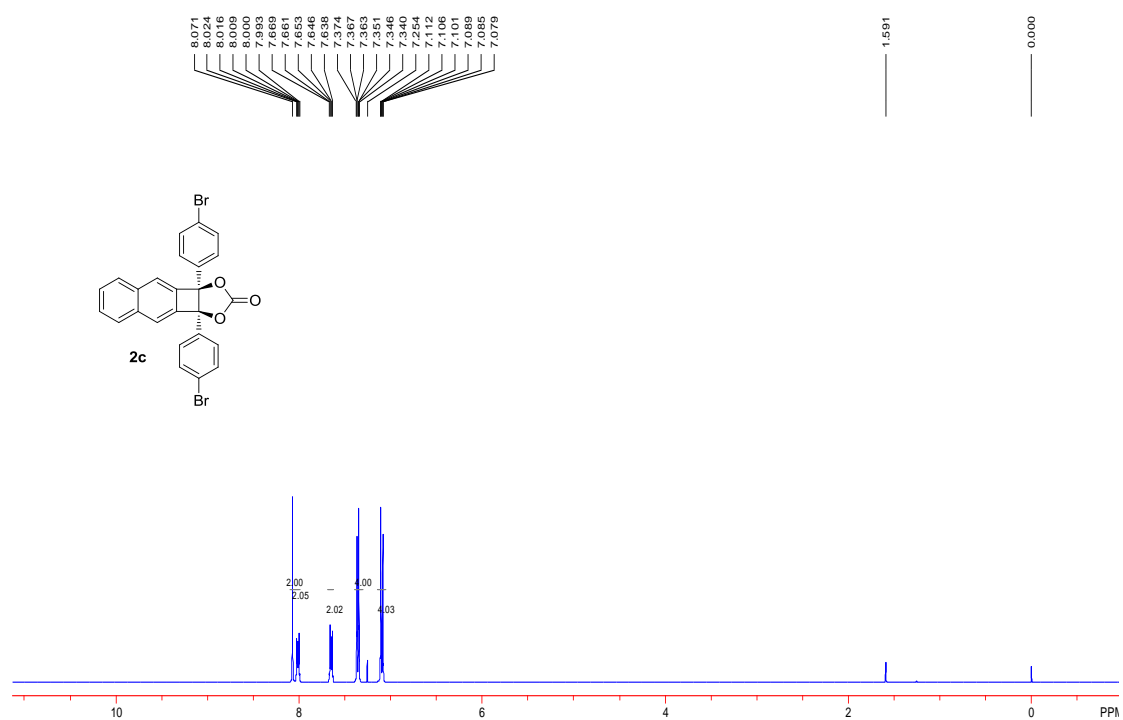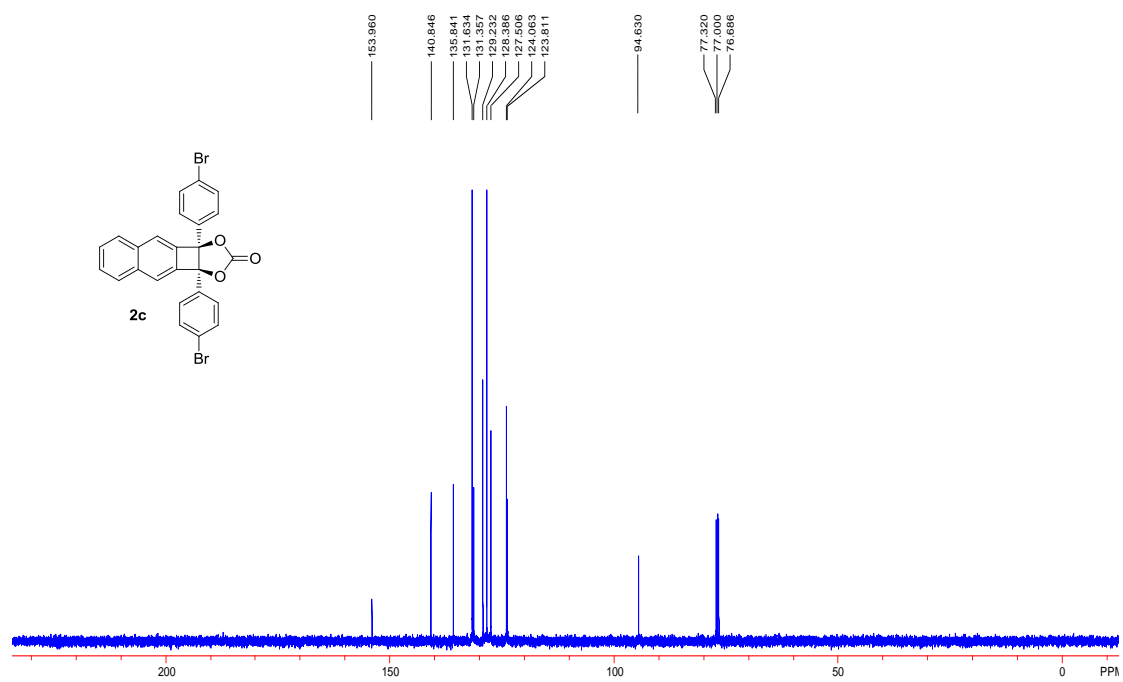

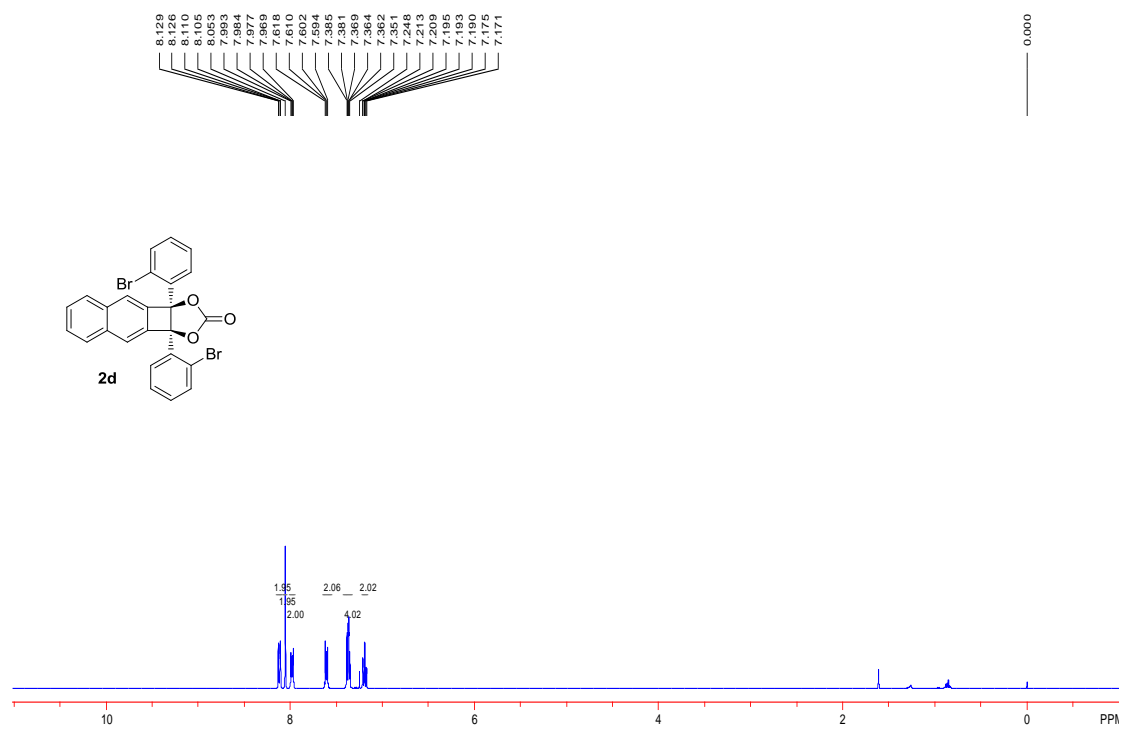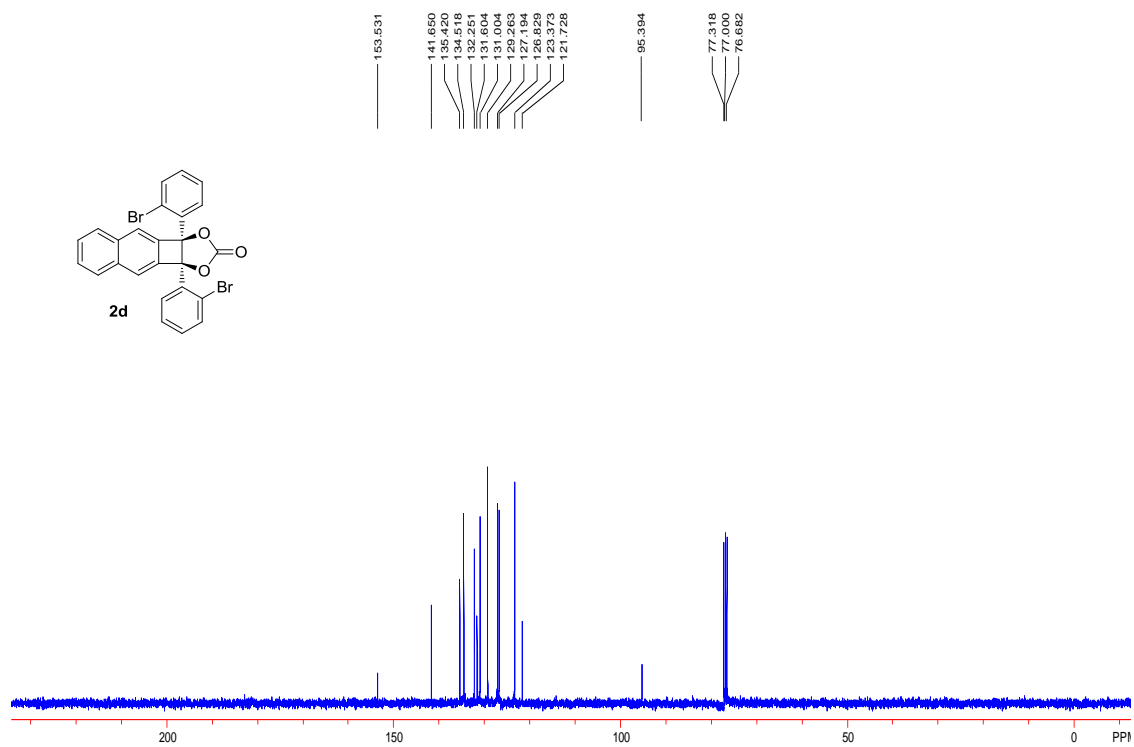

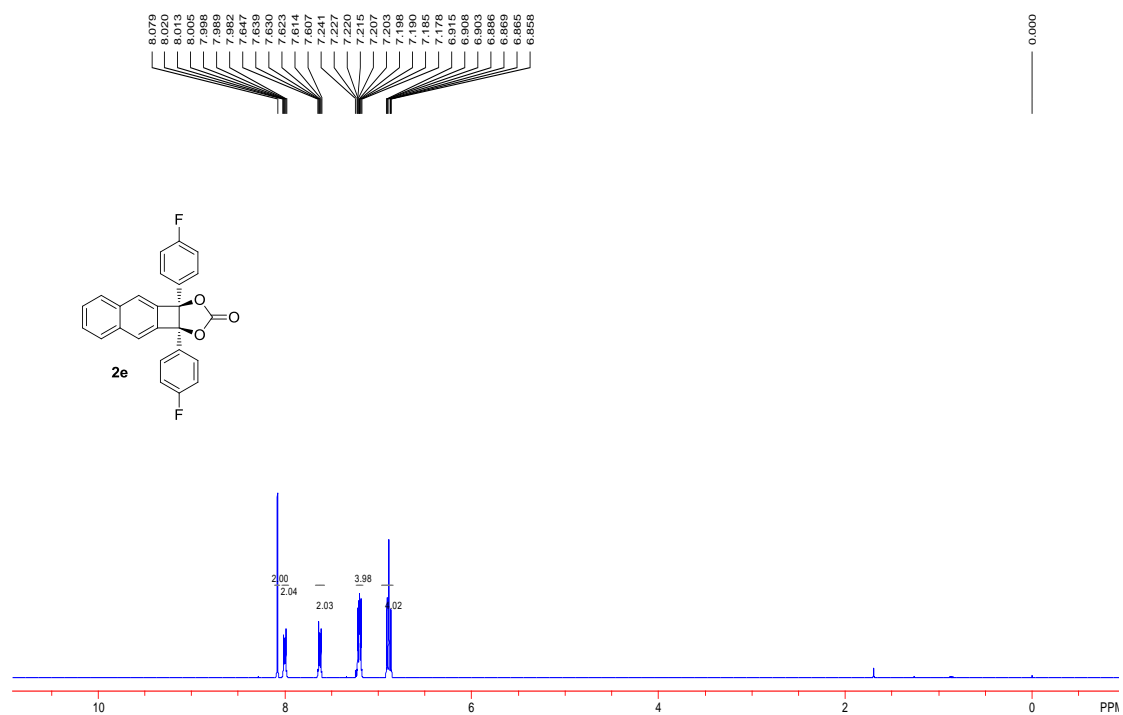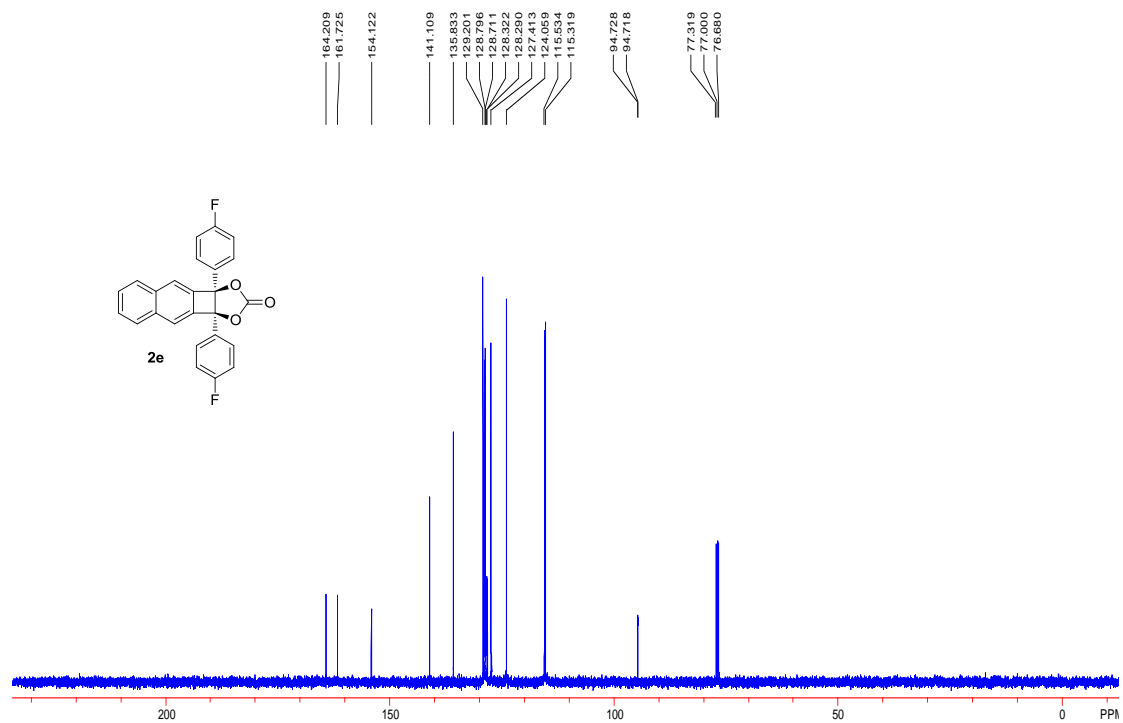

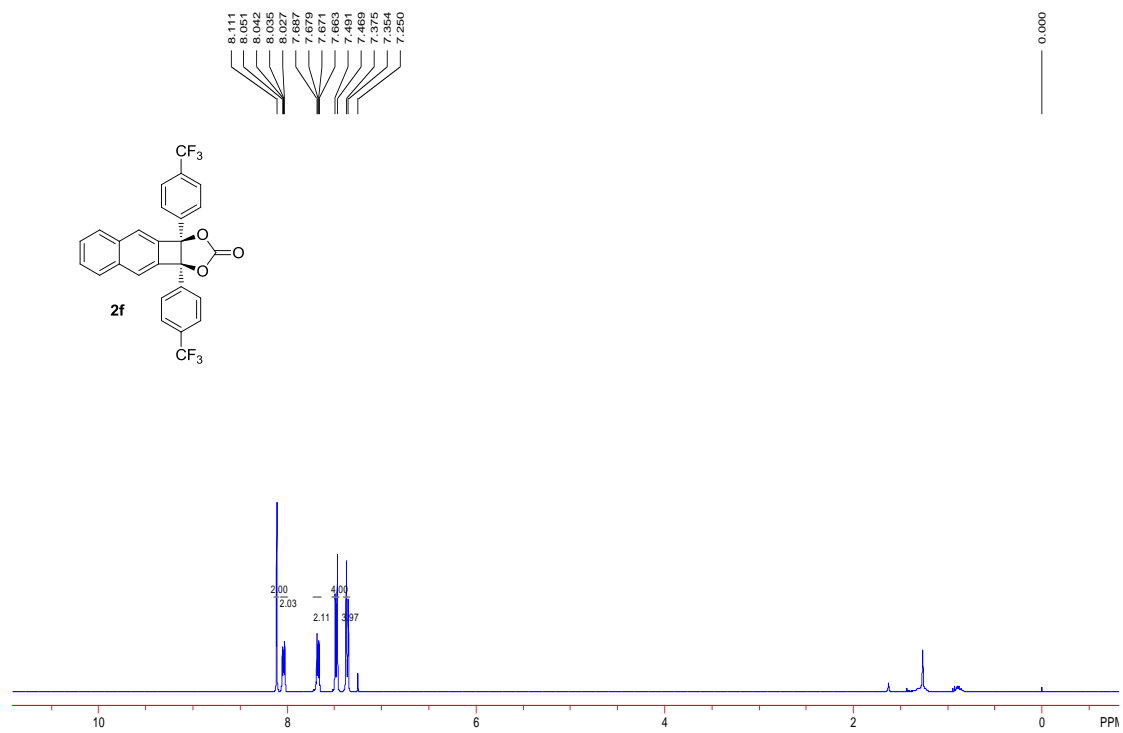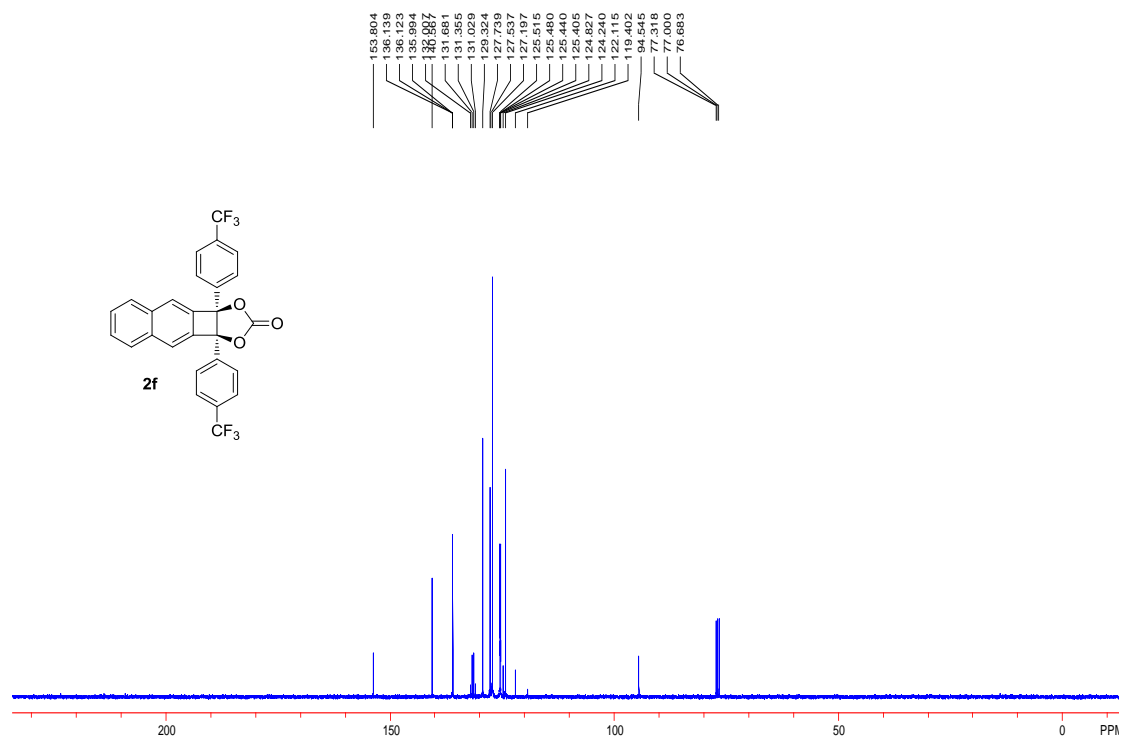



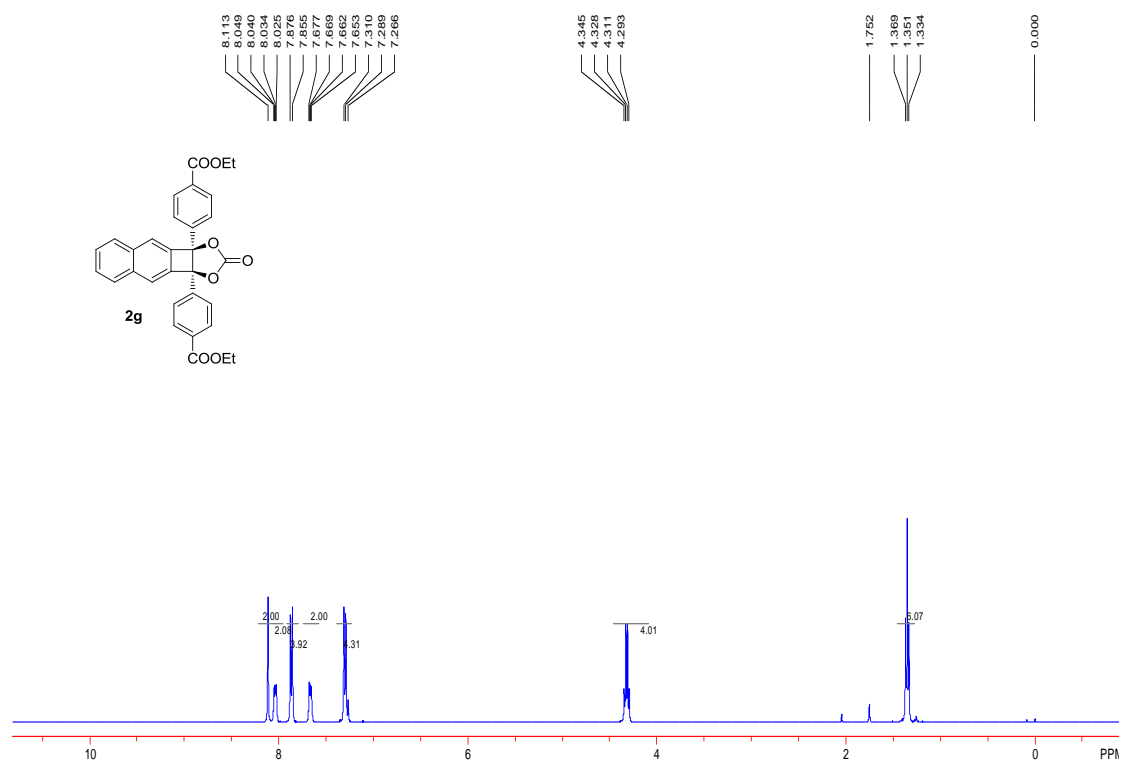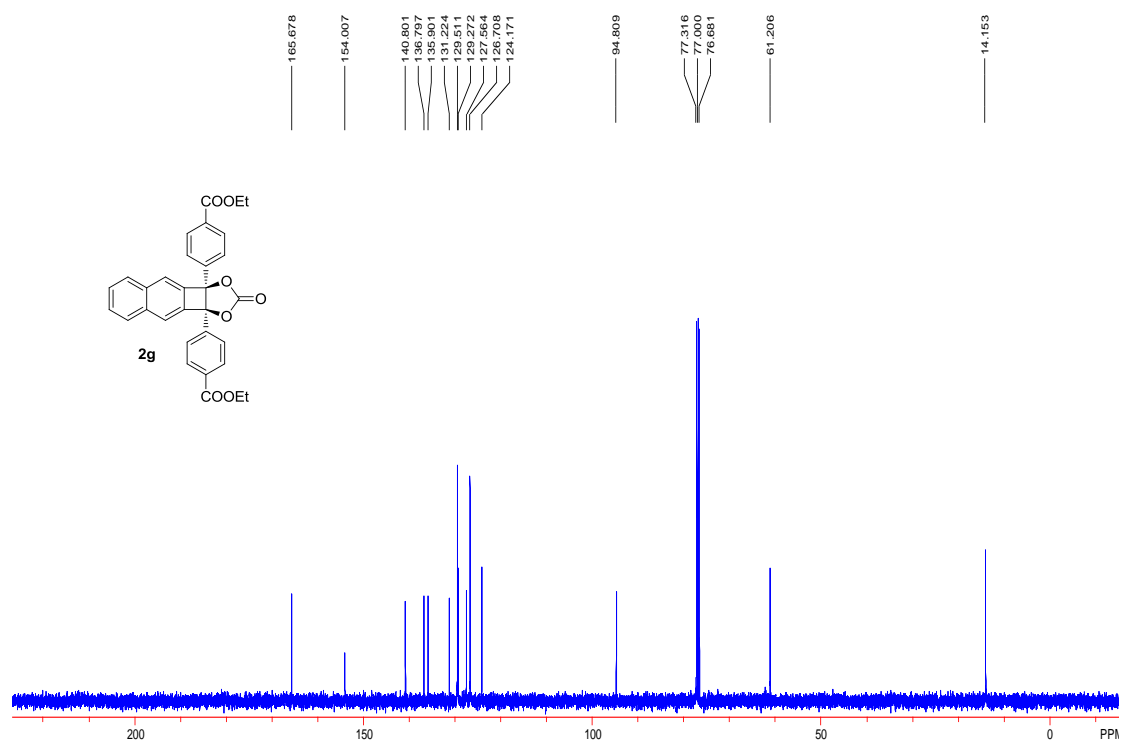

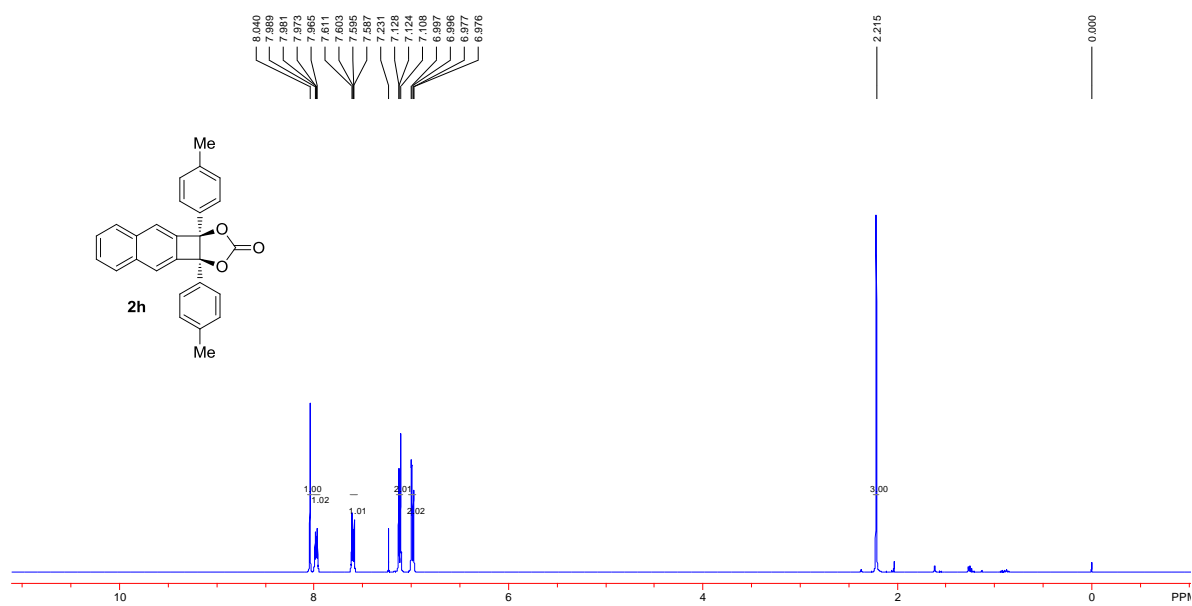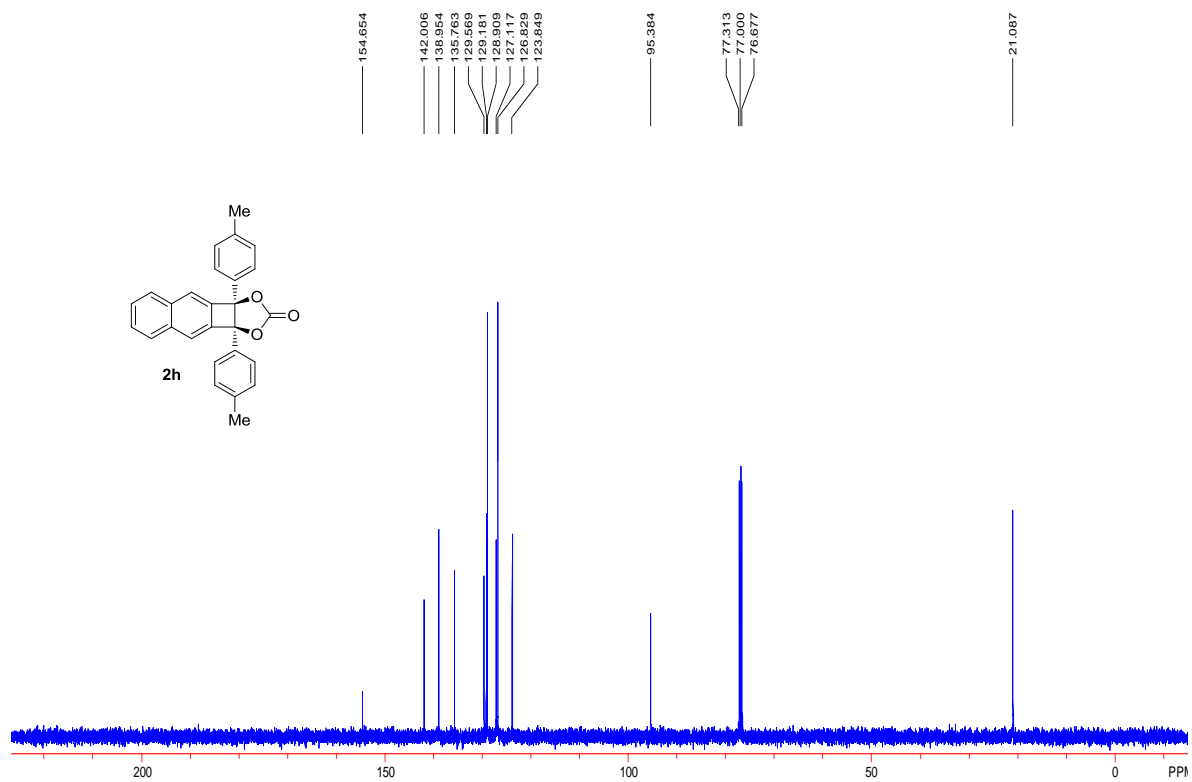

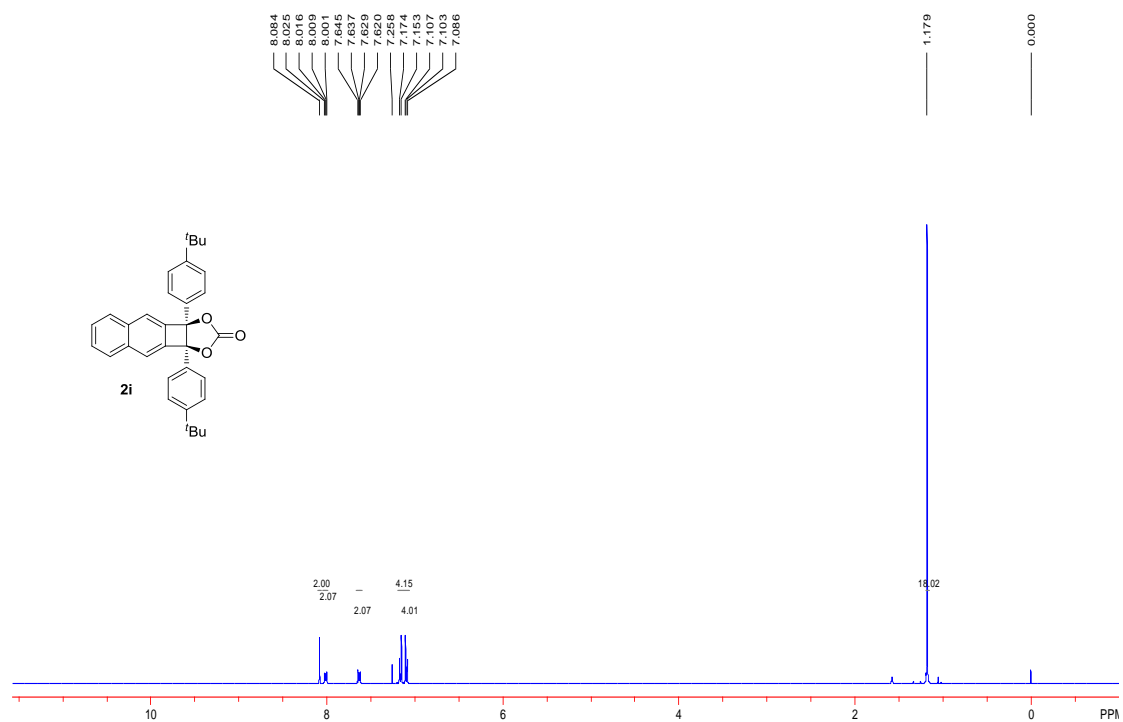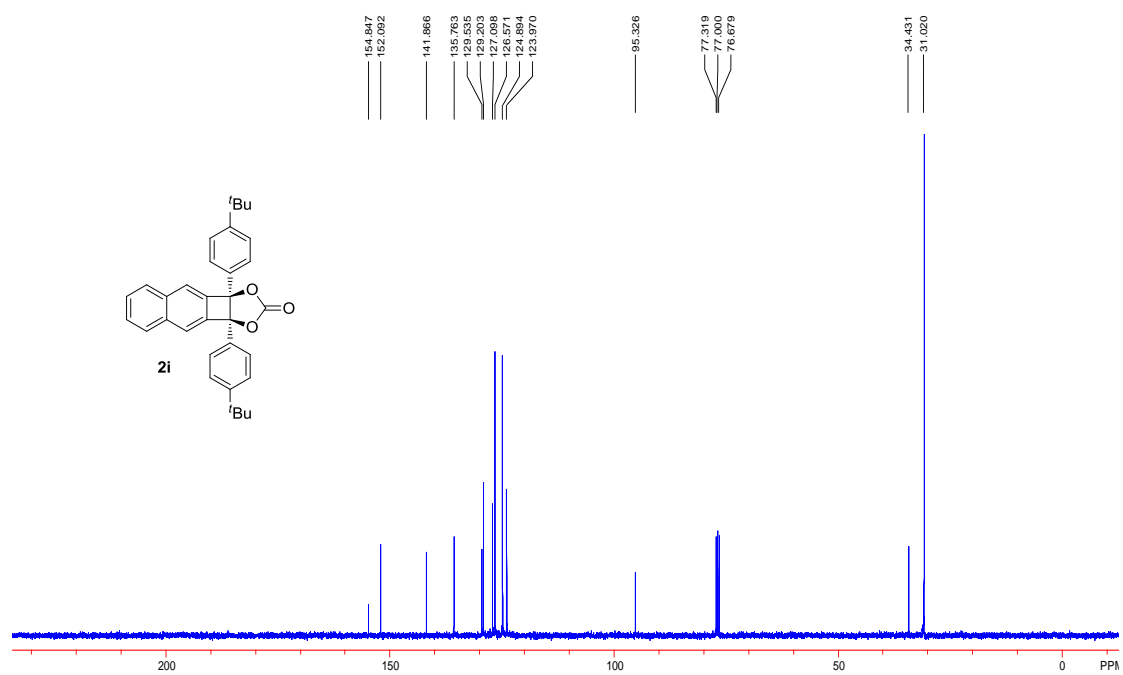

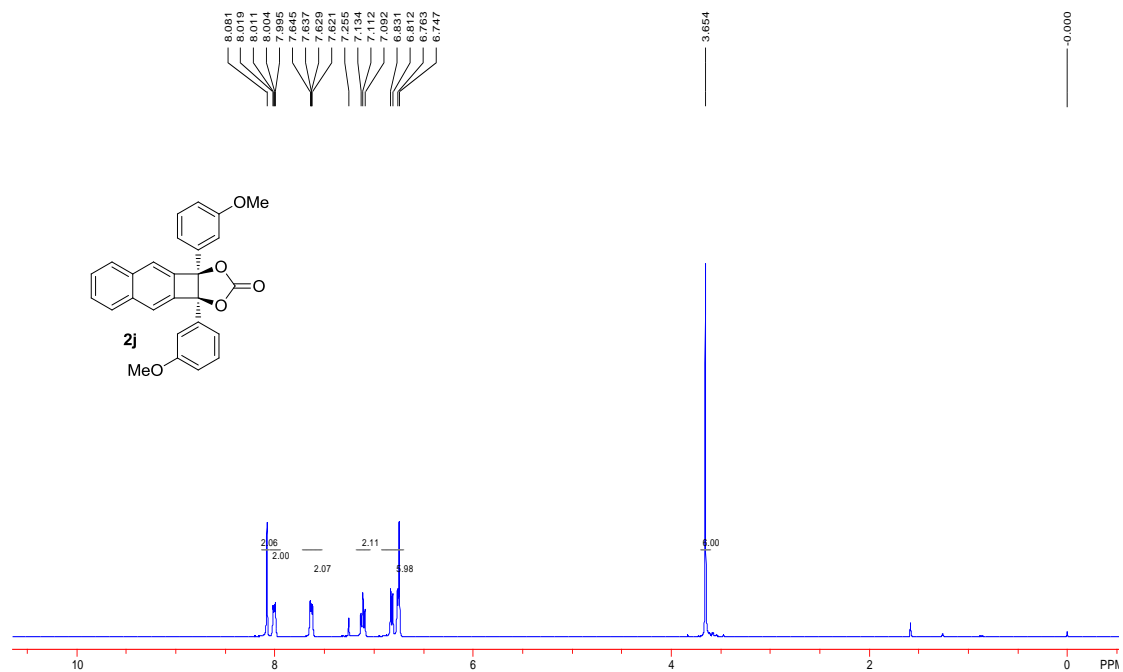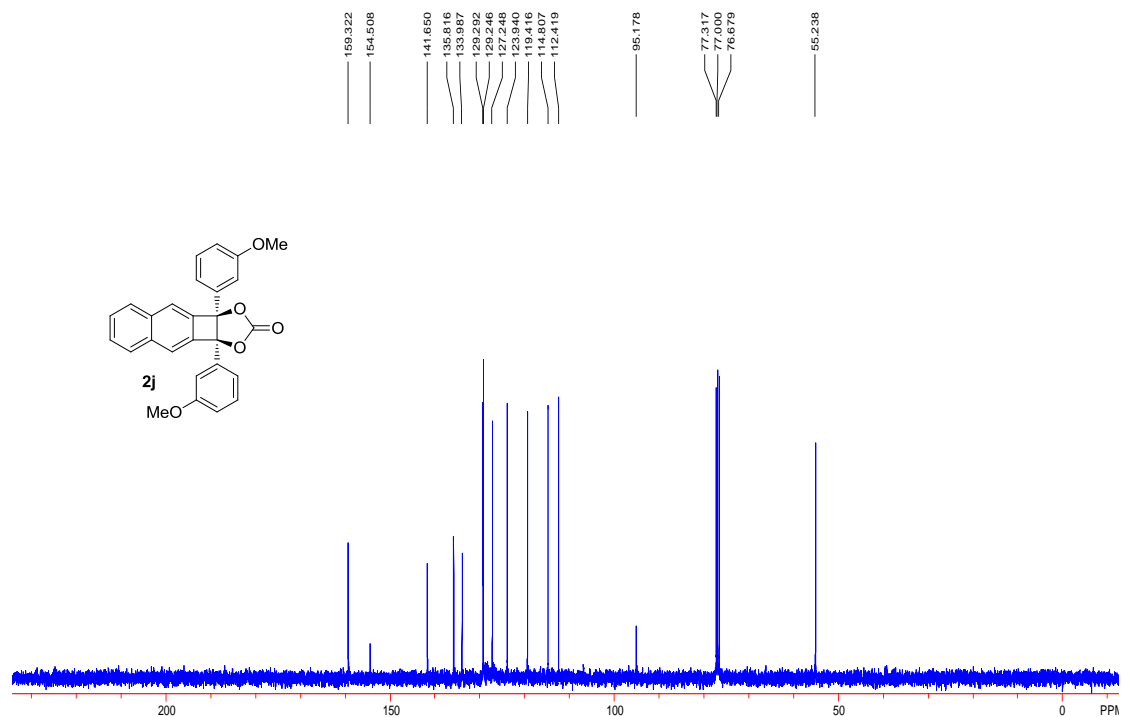

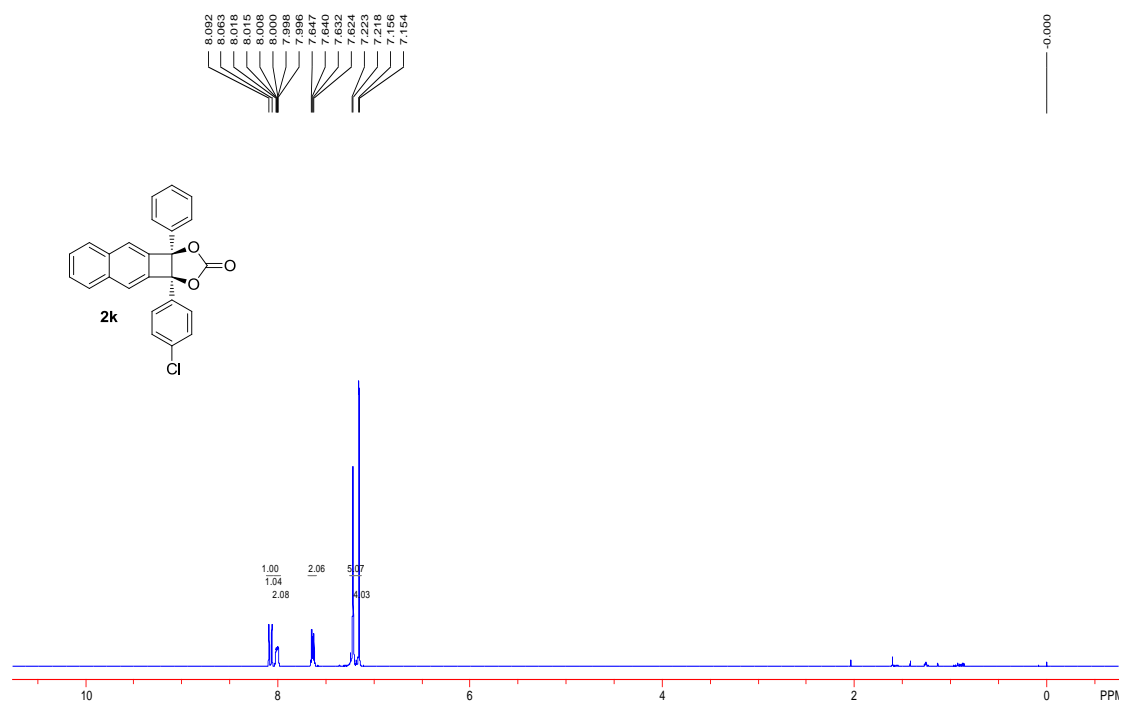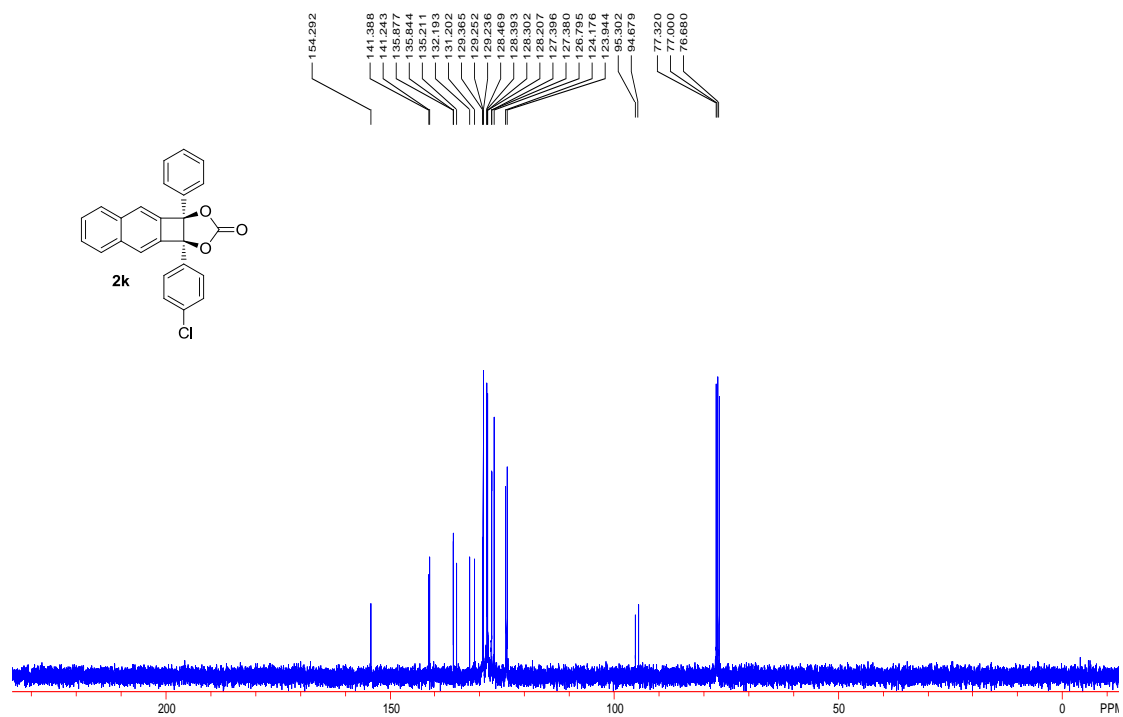

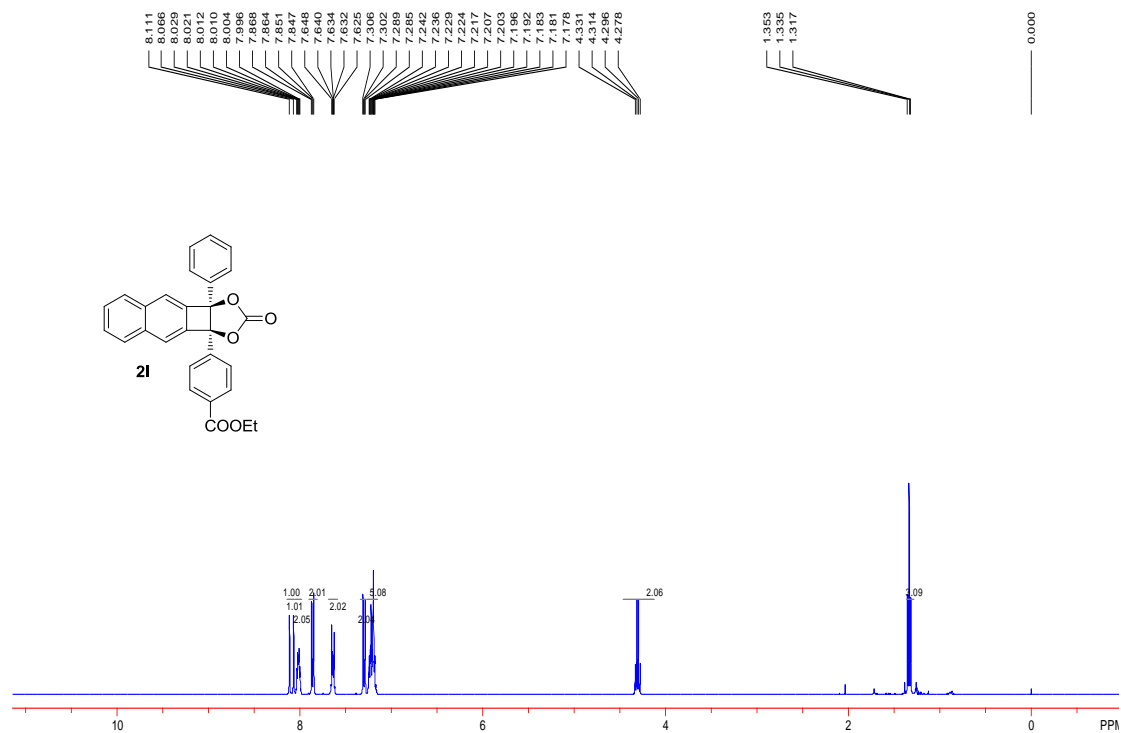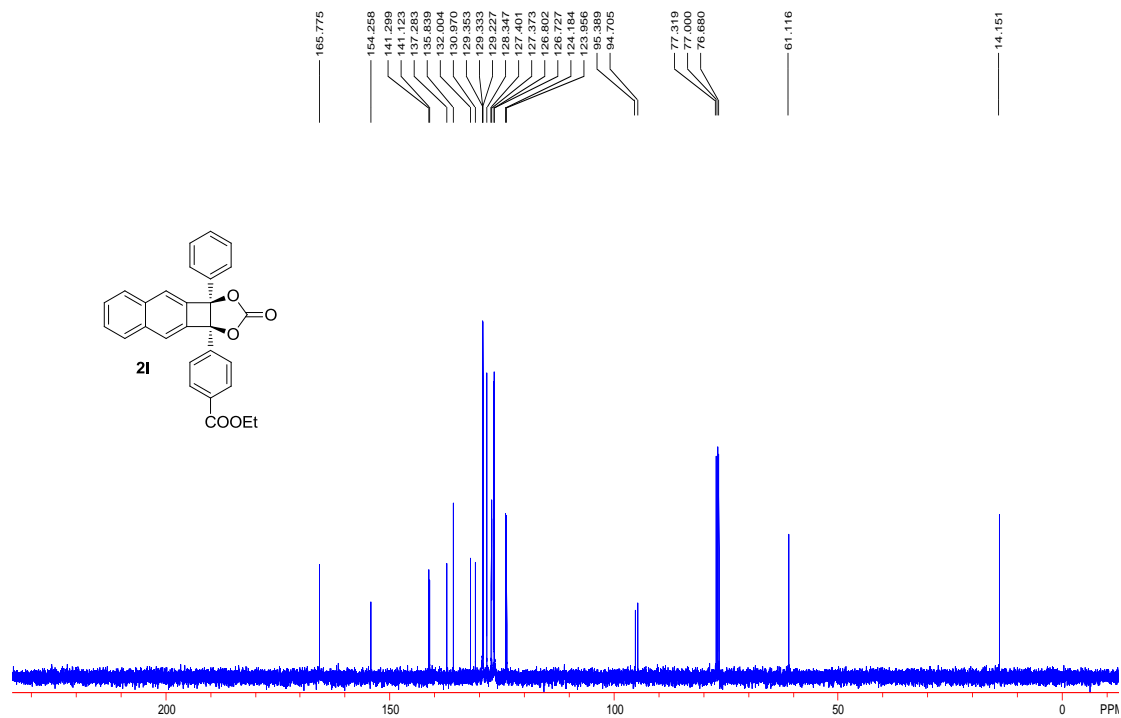

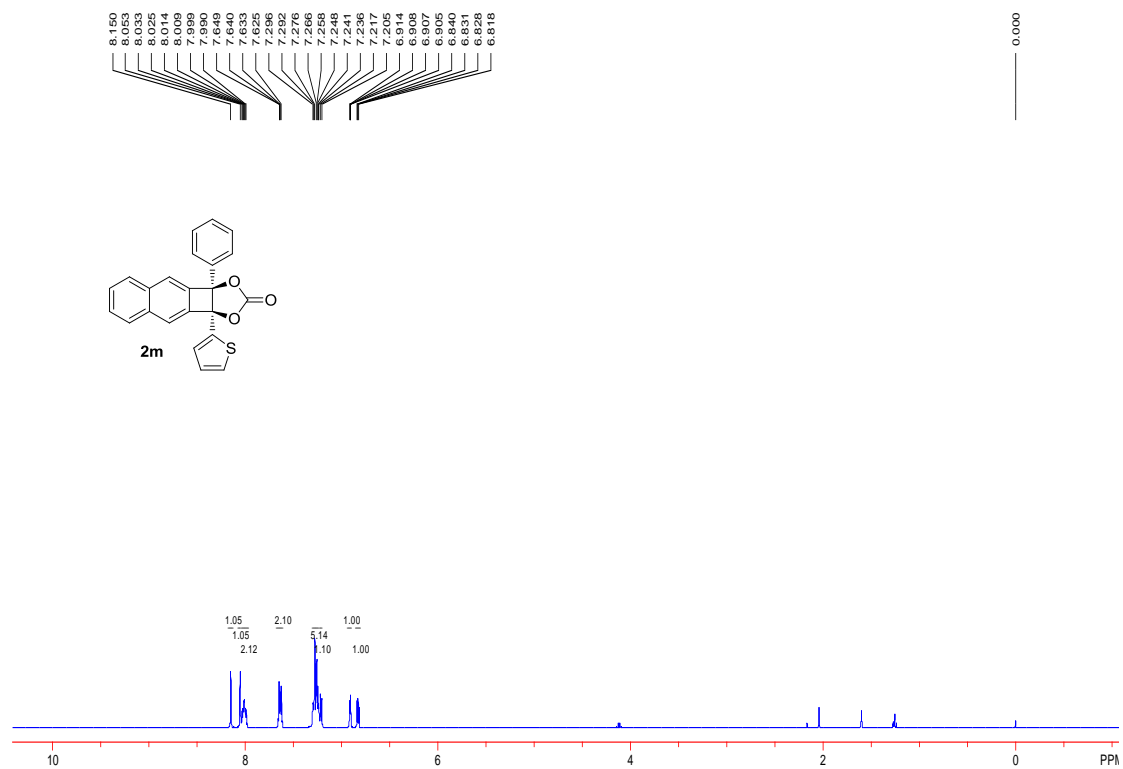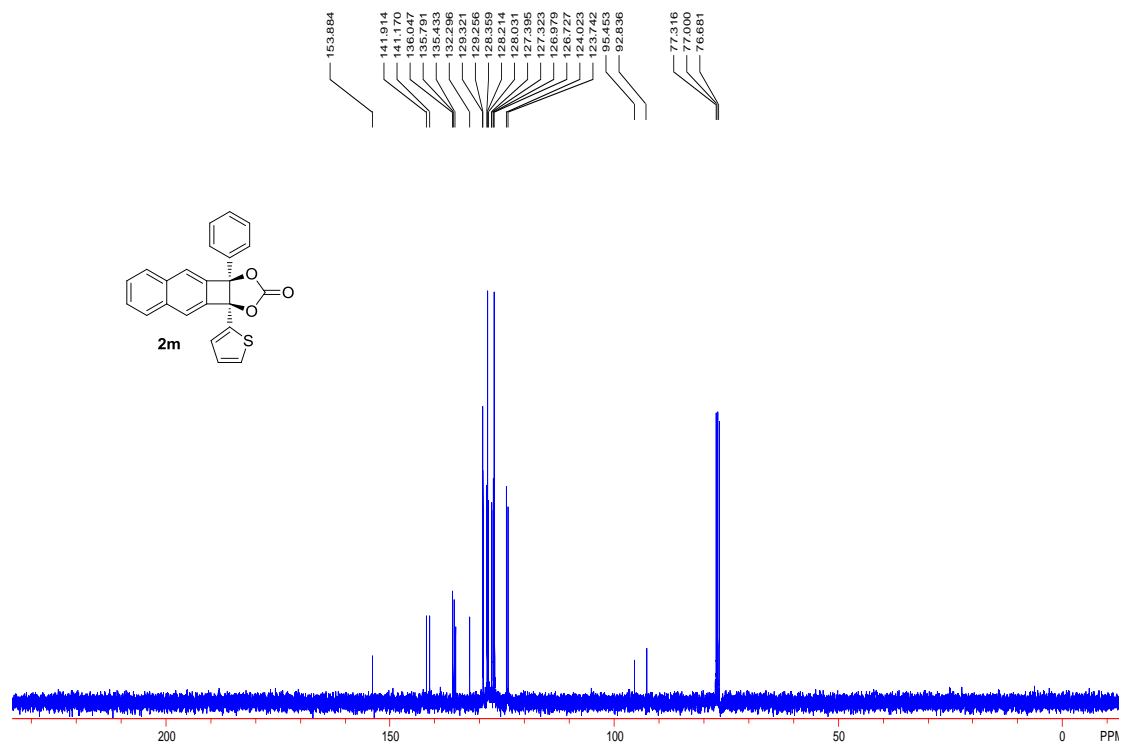

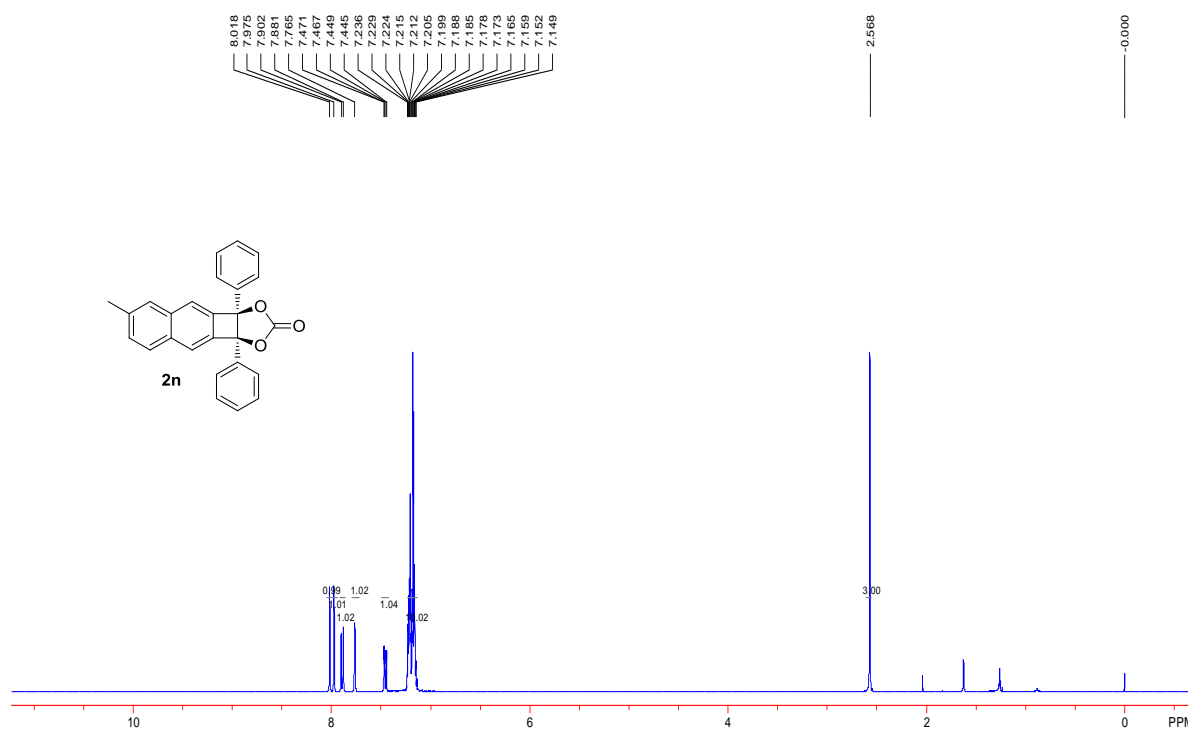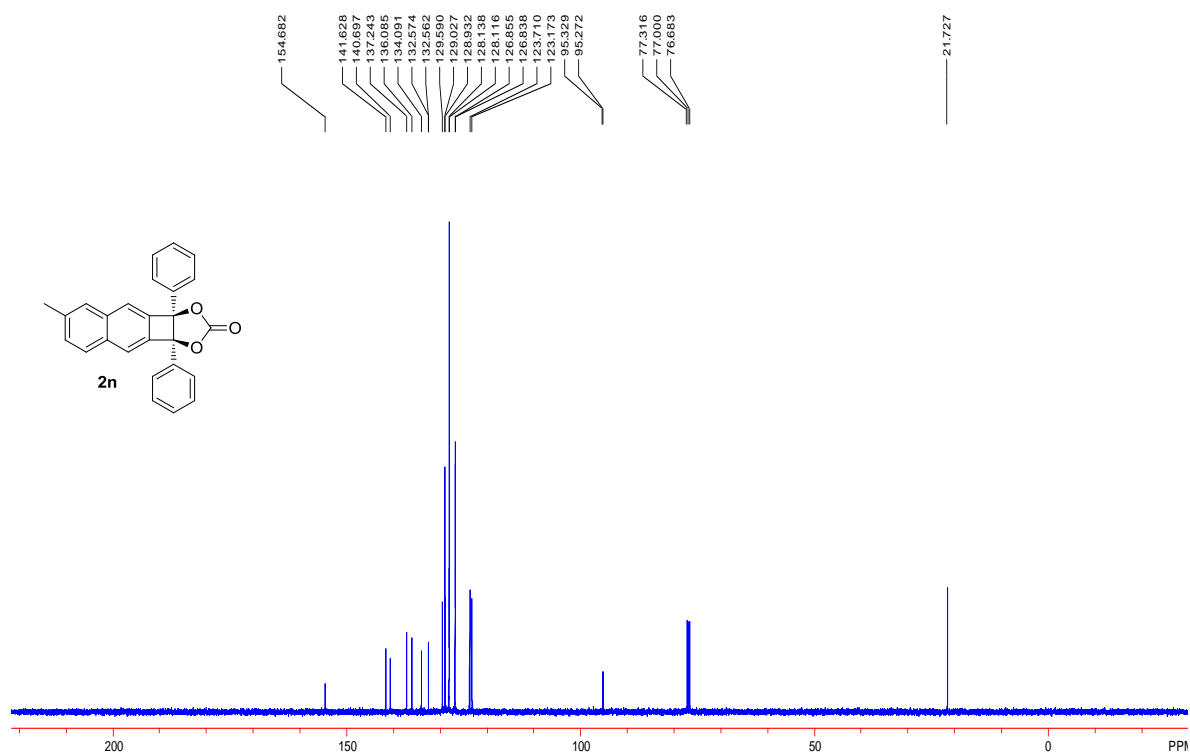



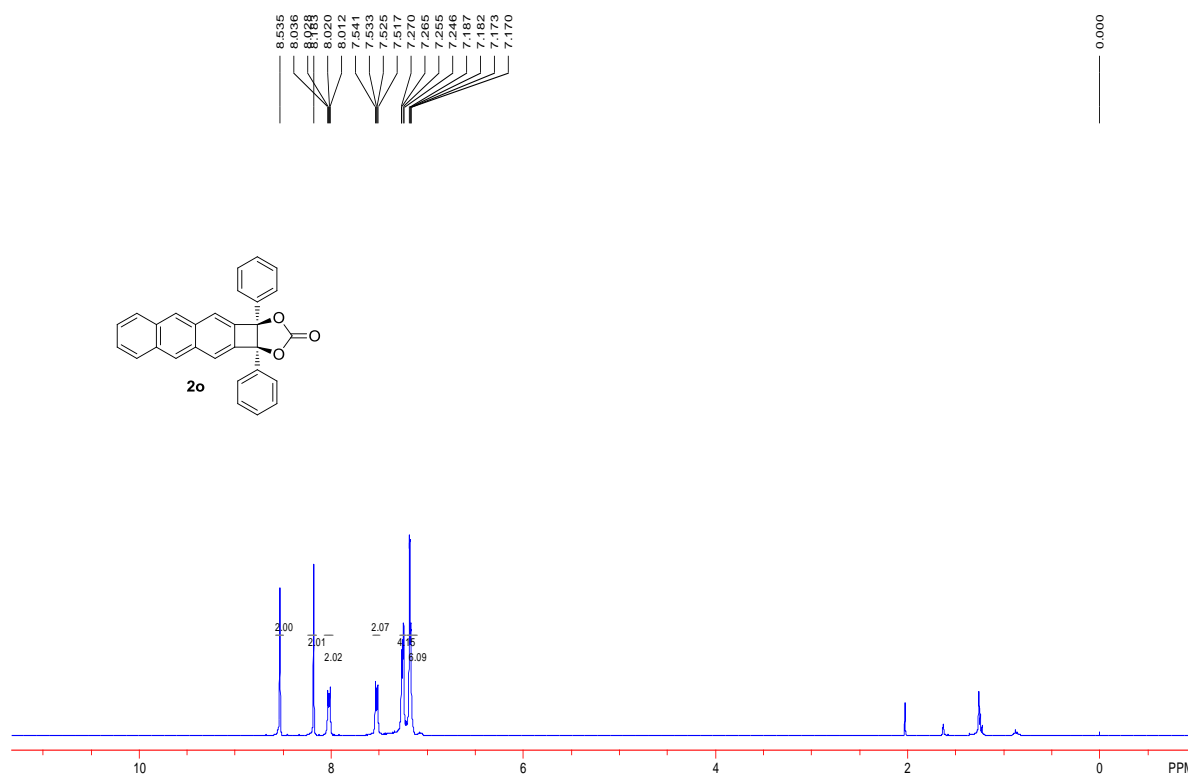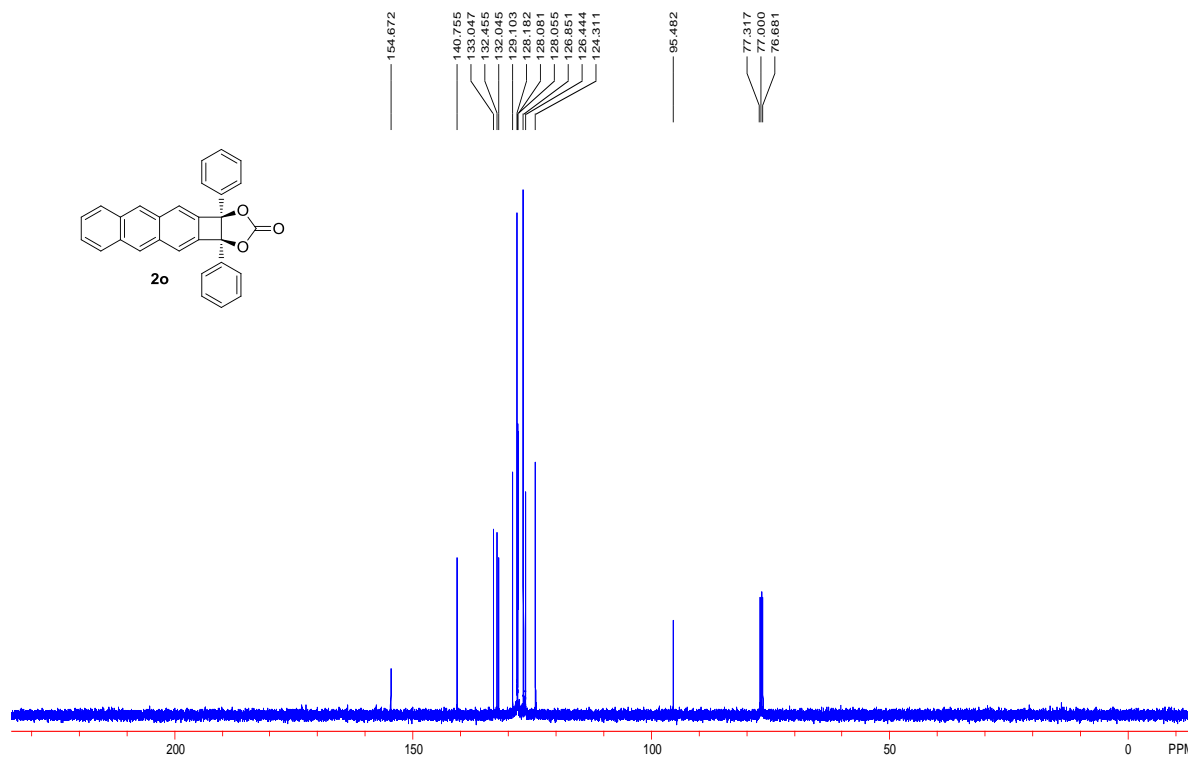

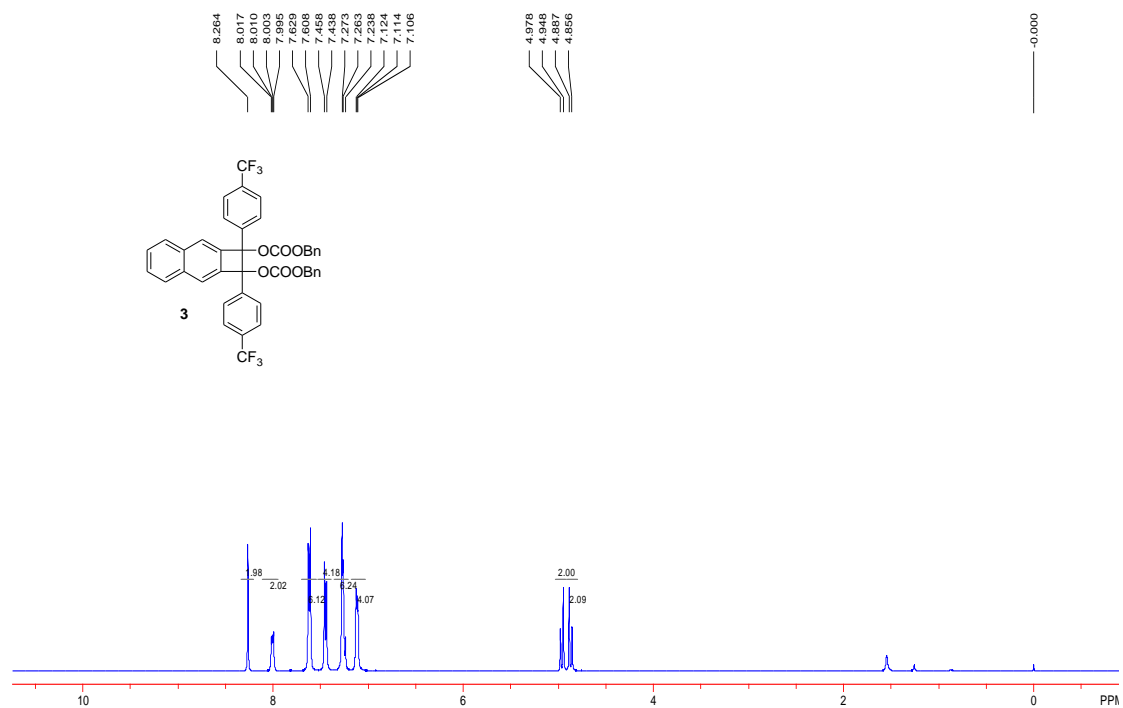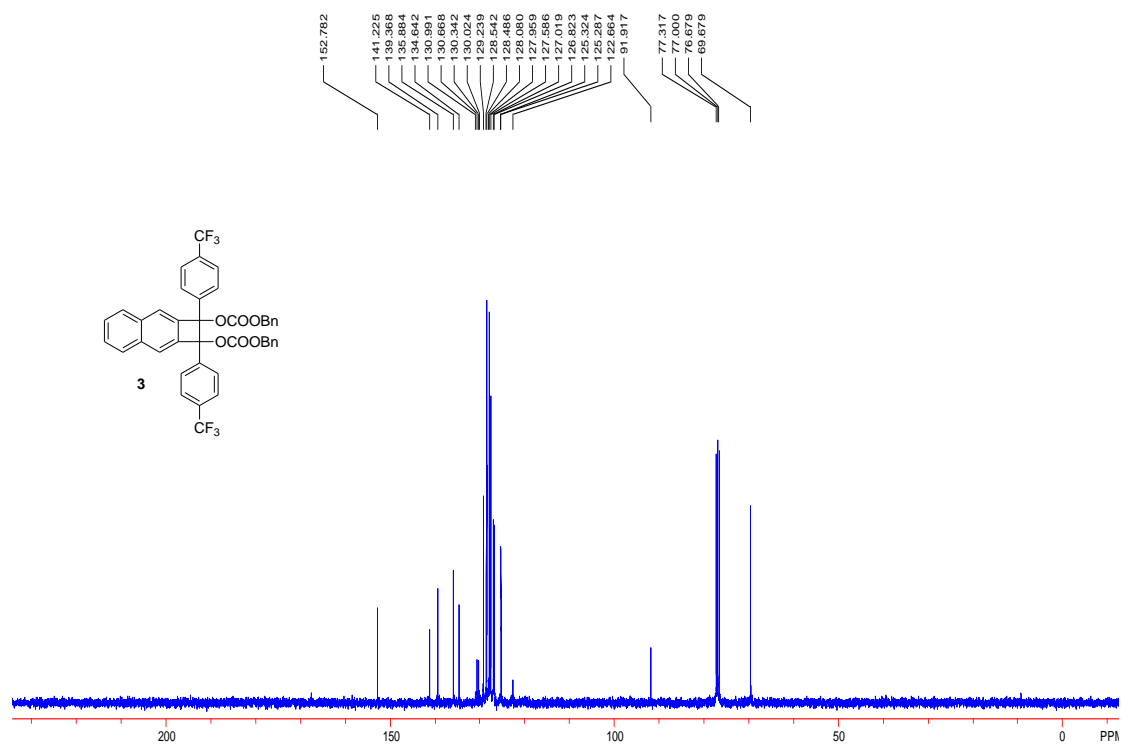

Supplement: c3cc44757j.pdf [file c3cc44757j.pdf]
